# Supplementary material for: Asthma in Adult Patients with COVID-19. Prevalence and Risk of Severe Disease
Source: PubMed Central journal article supplement — Am J Respir Crit Care Med. 2021 Apr 1;203(7):893–905. doi: 10.1164/rccm.202008-3266OC (PMC8017581; doi:10.1164/rccm.202008-3266oc), 2021-04-01
Supplement: rccm.202008-3266OC_terry_data_supplement.pdf [file rccm.202008-3266OC_terry_data_supplement.pdf]

## **Online Data Supplement**

Asthma in Adult Patients with COVID-19: Prevalence and Risk of Severe Disease

Paul D. Terry, R. Eric Heidel, and Rajiv Dhand

**Supplemental Table E1. Asthma prevalence in patients with COVID-19**

| First author, year                | Study description                                                                                                                                             | Overall prevalence of asthma | Prevalence of asthma according to COVID-19 severity      | Study limitations and comments                                                                                                                                                                                                                      |
|-----------------------------------|---------------------------------------------------------------------------------------------------------------------------------------------------------------|------------------------------|----------------------------------------------------------|-----------------------------------------------------------------------------------------------------------------------------------------------------------------------------------------------------------------------------------------------------|
| <b>North America</b>              |                                                                                                                                                               |                              |                                                          |                                                                                                                                                                                                                                                     |
| <b>New York City region, USA</b>  |                                                                                                                                                               |                              |                                                          |                                                                                                                                                                                                                                                     |
| Abrams, 2020 <sup>10</sup>        | 133 patients $\geq 18$ years who died after being admitted to one of three Columbia/NY Presbyterian hospitals with a positive test for COVID-19, 3/1 – 4/3/20 | 4.5%                         | Patients were recruited into the study only if they died | This study showed lower prevalence of asthma than the NYC adult population and most of the other studies conducted in the NYC region; these asthma data were not included in the overall pooled prevalence because surviving patients were excluded |
| Andrikopoulou, 2020 <sup>11</sup> | Case series of 158 pregnant women with laboratory-confirmed COVID-19 in New York City, 3/13 - 4/19/20                                                         | 11.4%                        | Non-severe: 8.1% (n=124)<br>Severe: 23.5% (n=34)         |                                                                                                                                                                                                                                                     |

|                                       |                                                                                                                                                                  |       |                                                                                                              |                                                                                                  |
|---------------------------------------|------------------------------------------------------------------------------------------------------------------------------------------------------------------|-------|--------------------------------------------------------------------------------------------------------------|--------------------------------------------------------------------------------------------------|
| Argenziano, 2020 <sup>12</sup>        | 1,000 PCR-confirmed patients with COVID-19 presenting at the Emergency Department at a hospital in New York City, 3/1 - 4/5/20                                   | 11.3% | Not hospitalized: 16.7% (n=150)<br>Hospitalized: 10.4% (n=850)<br>No ICU: 9.6% (n=614)<br>ICU: 12.3% (n=236) | No association between presence of asthma and need for intensive care                            |
| Clouston, 2020 <sup>13</sup>          | A retrospective cohort study of 1,387 admitted to a hospital in Long Island, NY, 3/7 – 5/15/20                                                                   | 6.3%  | Survived: 6.2% (n=1,176)<br>Died: 6.6% (n=211)                                                               | Multivariable RR of mortality for asthma = 0.90 (0.52-1.57)                                      |
| Cummings, 2020 <sup>14</sup>          | Prospective cohort of 257 critically ill patients admitted to hospitals in New York City with laboratory-confirmed COVID-19, 3/2 - 4/1/20                        | 8.2%  | All patients had severe COVID-19; mortality was not examined with respect to asthma                          |                                                                                                  |
| Gayam, 2021 <sup>15</sup>             | A retrospective cohort study of 408 African-American patients hospitalized with COVID-19 in New York City, 3/1 – 4/9/20                                          | 13.2% | Survived: 13.8% (n=276)<br>Died: 12.1% (n=132)                                                               |                                                                                                  |
| Goyal, 2020 <sup>16</sup>             | A retrospective case series among 391 adults $\geq 18$ years of age with confirmed COVID-19, admitted to hospitals in New York City in March 2020, 3/3 – 3/27/20 | 12.5% | No ventilation: 12.2% (n=263)<br>Ventilation: 13.1% (n=130)                                                  |                                                                                                  |
| Lieberman-Cribbin, 2020 <sup>17</sup> | Anonymous data from 6,245 patients with laboratory-confirmed COVID-19 within a hospital system in New York City with self-reported asthma, 2/29 – 4/24/20        | 4.4%  | In multivariable models, asthma was not associated with higher mortality in patients with COVID-19           | Asthma prevalence in patients with COVID-19 was lower than an uninfected comparison group (6.7%) |
| Lovinsky-Desir, 2020 <sup>18</sup>    | Data from 1,298 patients $\leq 65$ years of age (95.8% over age 20) with                                                                                         | 12.6% | No intubation: 12.4% (n=1,030)<br>Intubation: 13.1% (n=268)                                                  | Only 9 participants with asthma died; the observed                                               |

|                                 |                                                                                                                                                                         |       |                                                                                                                       |                                                                                                              |
|---------------------------------|-------------------------------------------------------------------------------------------------------------------------------------------------------------------------|-------|-----------------------------------------------------------------------------------------------------------------------|--------------------------------------------------------------------------------------------------------------|
|                                 | COVID-19 who were hospitalized or died in the emergency department of a New York City hospital network, 2/11 – 5/7/20                                                   |       | Survived: 13.0% (n=1,188)<br>Died: 8.2% (n=110)                                                                       | lover prevalence of asthma in those who died was observed both with and without several other co-morbidities |
| Maeda, 2020 <sup>19</sup>       | A retrospective cohort study of 224 adults hospitalized with COVID-19 in New York City, 3/13 – 3/31/20                                                                  | 10.3% | No ICU: 11.4% (n=167)<br>ICU: 7.0% (n=57)                                                                             | Only 23 participants had asthma                                                                              |
| Mikami, 2020 <sup>20</sup>      | A retrospective cohort study of 6,493 patients with laboratory-confirmed COVID-19 in New York City, 3/13 – 4/17                                                         | 4.2%  | Not hospitalized: 3.5% (n=2,785)<br>Hospitalized: 4.7% (n=3,708)<br>Survived: 4.8% (n=2,014)<br>Died: 4.5% (n=1,694)  |                                                                                                              |
| Marcello, 2020 <sup>21</sup>    | A retrospective cohort study of 10,143 people with diagnosis histories who tested positive for SARS-CoV-2 within the New York City Public Hospital System, 3/5 – 4/9/20 | 7%*   | Survived: 7.4% (n=4,363)<br>Died: 6% (n=1,717)                                                                        | Individuals testing negative for SARS-CoV-2 has 11% prevalence of asthma (n=6,464))                          |
| Palaiodimos, 2020 <sup>22</sup> | A retrospective cohort study of 200 adults admitted to a hospital in New York City with laboratory-confirmed COVID-19, 3/9 – 3/22/20                                    | 13.5% | Univariate OR of mortality for asthma was 0.51 (0.17 - 1.56)                                                          |                                                                                                              |
| Van Gerwen, 2021 <sup>23</sup>  | A retrospective cohort study of 3,703 adults with laboratory-confirmed COVID-19 in New York City, 3/1 – 4/1/20                                                          | 11.6% | Not hospitalized: 11.7% (n=1,688)<br>Hospitalized: 11.5% (n=2,015)<br>Survived: 12.2% (n=1,399)<br>Died: 9.9% (n=616) |                                                                                                              |
| Wang A, 2020 <sup>24</sup>      | A retrospective cohort study of 7,592 (mostly adult) people with laboratory-confirmed COVID-19 in                                                                       | 4.5%  |                                                                                                                       | Multivariable RR of mortality for asthma was 0.63 (0.38-1.04)                                                |

|                                |                                                                                                                                                      |       |                                                                  |                                                                    |
|--------------------------------|------------------------------------------------------------------------------------------------------------------------------------------------------|-------|------------------------------------------------------------------|--------------------------------------------------------------------|
|                                | New York City, up to 4/15/20                                                                                                                         |       |                                                                  |                                                                    |
| Paranjpe, 2020 <sup>25</sup>   | 2,199 adults with confirmed COVID-19 within the Mount Sinai medical system in New York City, 2/27 – 4/2/20                                           | 8.2%  | Survived: 8.3% (n=1,889)<br>Inpatient death: 7.4% (n=310)        |                                                                    |
| Richardson, 2020 <sup>26</sup> | 5,700 patients hospitalized with laboratory-confirmed COVID-19 in the New York City region, 3/1 – 4/4/20                                             | 9%*   | COVID-19 severity was not examined                               |                                                                    |
| Singer, 2020 <sup>27</sup>     | 1,651 people presenting to a large academic medical center emergency department, on eastern Long Island, NY, with confirmed COVID-19, 3/13 – 4/14/20 | 6%*   | Not hospitalized: 5.1% (n = 914)<br>Hospitalized: 7.1% (n = 737) | Prevalence of asthma in COVID-19-negative people was 11% (n=1,246) |
| Toussie, 2020 <sup>28</sup>    | Retrospective study of 338 adults (age 21-50) with laboratory-confirmed COVID-19 in New York City, 3/3 – 3/26/20                                     | 13.6% | Non-severe 14.4% (n=202)<br>Severe: 12.5% (n=136)                |                                                                    |
| Pujadas, 2020 <sup>157</sup>   | Prospective study of 1,145 patients hospitalized with laboratory-confirmed COVID-19 in New York City, 3/13 – 5/4/20                                  | N/A   | RR of mortality for asthma was 0.92 (0.57 – 1.49) (n=1,145)      |                                                                    |
| <b>Other Eastern USA</b>       |                                                                                                                                                      |       |                                                                  |                                                                    |
| Fox, 2020 <sup>29</sup>        | Retrospective analysis of 355 adults with COVID-19 hospitalized in                                                                                   | 7.6%  |                                                                  | Multivariable OR of morbidity for asthma among                     |

|                               |                                                                                                                                                                          |       |                                                                                                                                                                                                                    |                                                                      |
|-------------------------------|--------------------------------------------------------------------------------------------------------------------------------------------------------------------------|-------|--------------------------------------------------------------------------------------------------------------------------------------------------------------------------------------------------------------------|----------------------------------------------------------------------|
|                               | Philadelphia, PA, 3/1 – 4/24/20                                                                                                                                          |       |                                                                                                                                                                                                                    | 166 patients who also had diabetes was 0.71 (0.08 – 6.67)            |
| Salacup, 2020 <sup>30</sup>   | A retrospective study of 242 adults who were hospitalized with COVID-19 in Philadelphia, PA, 3/1 – 4/24/20                                                               | 7.4%  | Survived: 10% (n=190)<br>Died: 0% (n=52)                                                                                                                                                                           |                                                                      |
| Dashti, 2020 <sup>31</sup>    | A retrospective study of 4,140 patients with at least one positive or presumptive positive COVID-19 test results in the Partners system in Boston, MA, 12/1/19 – 4/18/20 | 12.9% | Not hospitalized: 12.2% (n=2,759)<br>Hospitalized: 14.3% (n=1,194)<br>No ICU: 14.5% (n=619)<br>ICU: 14.1% (n=575)<br>Survived: 12.9% (n=3,953)<br>Died: 13.4% (n=187)                                              |                                                                      |
| Hsu, 2020 <sup>32</sup>       | 2,729 adult outpatients and inpatients with laboratory-confirmed COVID-19 seen at a medical center in Boston, Massachusetts, 3/1 – 5/18/20                               | 13.2% | Outpatients: 11.4% (n = 1,543)<br>Inpatients: 15.5% (n=1,186)<br>Non-ICU: 15.6% (n=900)<br>ICU - no ventilation: 8.7% (n=69)<br>ICU - ventilation: 19.3% (n=119)<br>Survived: 15.5% (n=1088)<br>Died: 15.3% (n=98) |                                                                      |
| Robinson, 2020 <sup>152</sup> | Matched study of 403 patients with COVID-19 in Boston, MA, 3/8 – 4/27/20                                                                                                 | N/A   | Survived: 20.4% (n=358)<br>Died: 15.6% (n=45)                                                                                                                                                                      | Relative risk of death for patients with asthma was 0.64 (0.24-1.68) |
| Garibaldi, 2020 <sup>33</sup> | A retrospective cohort of 832 patients admitted to hospitals in Maryland and Washington DC, 3/4 – 4/24/20                                                                | 9.5%  | Not severe: 10.3% (n=523)<br>Severe: 9.4% (n=171)<br>Survived: 10.1% (n=694)<br>Died: 6.1% (n=131)                                                                                                                 |                                                                      |
| Newton, 2020 <sup>34</sup>    | A case series of 993 patients with                                                                                                                                       | 13.5% | Not hospitalized: 12.1% (n=553)                                                                                                                                                                                    |                                                                      |

|                                |                                                                                                                              |       |                                                                                                                                                             |                                                                                                                                                                                  |
|--------------------------------|------------------------------------------------------------------------------------------------------------------------------|-------|-------------------------------------------------------------------------------------------------------------------------------------------------------------|----------------------------------------------------------------------------------------------------------------------------------------------------------------------------------|
|                                | symptomatic COVID-19 presenting to an emergency department in Washington, DC, 3/12 – 8/9/20                                  |       | Hospitalized: 15.2% (n=440)<br>No ICU: 14.6% (n=370)<br>ICU: 18.6% (n=70)                                                                                   |                                                                                                                                                                                  |
| Rosenthal, 2021 <sup>151</sup> | Retrospective study of 727 with COVID-19 in Washington DC, March-May, 2020                                                   | N/A   | Not hospitalized: 14.6% (n=453)<br>Hospitalized: 14.2% (n=274)<br>No ICU: 14.3% (659)<br>ICU: 16.2% (n=68)<br>Survived: 14.3% (n=666)<br>Died: 16.4% (n=61) | Patients with other lung diseases were excluded                                                                                                                                  |
| O’Keefe, 2020 <sup>35</sup>    | A retrospective cohort study of 496 adults with laboratory-confirmed COVID-19 in Atlanta, GA, 3/24 – 5/26/20                 | 14.7% | Not hospitalized: 14.5% (n=461)<br>Hospitalized: 17.1% (n=35)                                                                                               |                                                                                                                                                                                  |
| <b>Western USA</b>             |                                                                                                                              |       |                                                                                                                                                             |                                                                                                                                                                                  |
| Arentz, 2020 <sup>36</sup>     | A series of 21 incident cases (case series) of COVID-19 admitted to the ICU at a hospital in Washington state, 2/20 – 3/5/20 | 9.1%  | All had severe disease requiring admission to ICU                                                                                                           | Only 2 participants with asthma                                                                                                                                                  |
| Azar, 2020 <sup>37</sup>       | A retrospective cohort study of 1,052 adults with confirmed COVID-19 in Northern California, 1/1 – 4/8/20                    | 11.3% | Not admitted: 9.6% (n=796)<br>Admitted: 11.3% (n=356)<br>No ICU: 15.8% (n=146)<br>ICU: 18.2% (n=110)<br>Survived: 17.1% (n=59)<br>Died: 19.6% (n=51)        | Prevalence of asthma was higher (we calculated 15.7%) among 12,984 patients who tested negative for COVID-19; values for “survived,” “no ICU,” and “not admitted” were estimated |
| Shah, 2020 <sup>38</sup>       | A retrospective cohort study of 316 adults with laboratory-confirmed                                                         | 12.1% | COVID-19 severity was not examined                                                                                                                          | The prevalence of asthma in 283 participants who tested                                                                                                                          |

|                              |                                                                                                                                                      |       |                                                              |                                                     |
|------------------------------|------------------------------------------------------------------------------------------------------------------------------------------------------|-------|--------------------------------------------------------------|-----------------------------------------------------|
|                              | COVID-19 in San Francisco, CA, 2/3 – 3/31/20                                                                                                         |       |                                                              | negative for COVID-19 was 13.4%                     |
| Yan, 2020 <sup>39</sup>      | A retrospective cohort study of 128 adults with laboratory-confirmed COVID-19 in San Diego, CA, 3/3 – 4/8/20                                         | 10.2% | Not hospitalized: 9.8% (n=102)<br>Hospitalized: 11.5% (n=26) |                                                     |
| Bhatraju, 2020 <sup>40</sup> | 24 patients from nine Seattle-area hospitals who were admitted to the ICU with confirmed COVID-19, 2/24 – 3/9/20                                     | 14%*  | All had severe disease requiring admission to ICU            | Only 3 participants with asthma                     |
| Bruckner, 2020 <sup>41</sup> | Retrospective chart review of 105 adults with laboratory-confirmed COVID-19 admitted to one of three hospitals in Seattle, Washington, 3/2 – 3/26/20 | 9.5%  | Not severe: 13.0% (n=54)<br>Severe: 5.9% (n=51)              | Only 3 participants with asthma had severe COVID-19 |
| Lokken, 2020 <sup>42</sup>   | Retrospective study of 46 pregnant patients hospitalized with a laboratory-confirmed severe acute COVID-19 in Washington State, 1/21 – 4/17/20       | 8.7%  | COVID-19 severity was not examined                           | Only 2 participants with asthma                     |
| Duanmu, 2020 <sup>43</sup>   | Retrospective study of 100 adults presenting at an emergency room (ER) in Northern California with laboratory-confirmed COVID-19, 3/4 - 3/23/20      | 10.0% | Not hospitalized: 9% (n=76)<br>Hospitalized: 13% (n=24)      | Only 10 participants had asthma                     |
| Ferguson, 2020 <sup>44</sup> | Retrospective study of 72 adults with laboratory-confirmed COVID-19 in                                                                               | 9.7%  | COVID-19 severity was not examined                           | Only 7 participants had asthma                      |



|                                |                                                                                                                                                                 |       |                                                                                                         |                                                                                                                      |
|--------------------------------|-----------------------------------------------------------------------------------------------------------------------------------------------------------------|-------|---------------------------------------------------------------------------------------------------------|----------------------------------------------------------------------------------------------------------------------|
|                                | Northern California, 3/13 – 4/11/20                                                                                                                             |       |                                                                                                         |                                                                                                                      |
| Monteiro, 2020 <sup>45</sup>   | A retrospective cohort study of 112 adults hospitalized with COVID-19 in Los Angeles, CA, 3/12 – 6/16/20                                                        | 11.6% | Not intubated: 10.7% (n=84)<br>Intubated: 14.3% (n=28)                                                  | Only 13 participants with asthma                                                                                     |
| Tartof, 2020 <sup>46</sup>     | A retrospective cohort study of 6,916 mostly adult members of Kaiser Permanente Southern California with COVID-19 diagnosis (code or laboratory), 2/13 – 5/2/20 | 18.4% | Survived: 18.3% (n=6,710)<br>Died: 21.4% (n=206)                                                        | Multivariable RR of death for asthma patients was 0.81 (0.54–1.21)                                                   |
| Dai, 2020 <sup>47</sup>        | A retrospective cohort study of 863 patients from California, Oregon, and Washington with COVID-19, 3/1 – 8/30/20                                               | 4.8%  | COVID-19 severity was not examined                                                                      | Among 305,588 people in the cohort who tested negative for COVID-19, the prevalence of asthma was approximately 7.1% |
| Broadhurst, 2020 <sup>48</sup> | 436 patients with COVID-19 admitted to a hospital in Denver, Colorado (exact dates of assessment were not specified)                                            | 12.2% | No ICU: 13.7% (n=212)<br>ICU: 10.8% (n=139)<br>Not intubated: 13.7% (n=227)<br>Intubated: 10.8% (n=111) |                                                                                                                      |
| Barasa, 2020 <sup>49</sup>     | A retrospective chart review of 117 adults with laboratory-confirmed COVID-19 in Oregon, 2/2 – 10/21/20                                                         | 12.0% | COVID-19 severity was not examined                                                                      | The prevalence of asthma in 277 participants who tested negative for COVID-19 was 13.1%                              |
| <b>Midwestern USA</b>          |                                                                                                                                                                 |       |                                                                                                         |                                                                                                                      |
| Campioli, 2020 <sup>50</sup>   | Retrospective analysis of 251 adults with laboratory-confirmed COVID-19                                                                                         | 18.3% | Not hospitalized: 18.0% (n=189)<br>Hospitalized: 19.4% (n=62)                                           |                                                                                                                      |

|                                 |                                                                                                                                               |       |                                                                                                                                                                                          |                                                                                                                                                                                                                                                                   |
|---------------------------------|-----------------------------------------------------------------------------------------------------------------------------------------------|-------|------------------------------------------------------------------------------------------------------------------------------------------------------------------------------------------|-------------------------------------------------------------------------------------------------------------------------------------------------------------------------------------------------------------------------------------------------------------------|
|                                 | in Minnesota, both ambulatory and hospitalized, who subsequently tested negative for the disease, 2/1 – 3/15/20                               |       |                                                                                                                                                                                          |                                                                                                                                                                                                                                                                   |
| Chhiba, 2020 <sup>51</sup>      | 1,526 patients with laboratory-confirmed COVID-19 in Illinois, 3/1 – 4/15/20                                                                  | 14.4% | Not Hospitalized: 15.6% (n=853)<br>Hospitalized: 13.5% (n=853)                                                                                                                           | Obesity, hypertension, coronary artery disease, COPD and GERD were co-morbid with asthma; control of these and other risk factors (age, gender, race, smoking, diabetes, sleep apnea) did not show an association between asthma and hospitalization for COVID-19 |
| Mahadavinia, 2020 <sup>52</sup> | Retrospective study of 935 patients hospitalized with laboratory-confirmed severe acute COVID-19 in Illinois, 3/12 – 4/3/20                   | 25.8% | Duration of intubation longer in patients with asthma. No statistically significant difference by asthma status in percent or duration of hospitalization, ARDS, or need for intubation. | Association with length of intubation was not observed in patients with allergic asthma                                                                                                                                                                           |
| Nguyen, 2020 <sup>53</sup>      | A retrospective analysis of data from 689 (mostly adult) patients with laboratory-confirmed COVID-19 in Chicago, Illinois, 3/16 – 4/16/20     | 17.3% | Not hospitalized: 19.3% (n=306)<br>Hospitalized: 15.2% (n=302)<br>Survived: 16.5% (n=266)<br>Died: 5.9% (n=34)                                                                           | Most participants were African-American                                                                                                                                                                                                                           |
| Jehi, 2020 <sup>54</sup>        | A retrospective cohort study of 4,536 patients hospitalized with COVID-19 in the Cleveland Clinic system in Ohio and Florida, 3/8/20 – 6/5/20 | 14.4% | Not hospitalized: 12.9% (3,578)<br>Hospitalized: 19.7% (n=958)                                                                                                                           |                                                                                                                                                                                                                                                                   |

|                              |                                                                                                                                                                                              |       |                                                                                                                   |                                                                                               |
|------------------------------|----------------------------------------------------------------------------------------------------------------------------------------------------------------------------------------------|-------|-------------------------------------------------------------------------------------------------------------------|-----------------------------------------------------------------------------------------------|
|                              |                                                                                                                                                                                              |       |                                                                                                                   |                                                                                               |
| Meyers, 2020 <sup>55</sup>   | A cohort study of 91 adults with laboratory-confirmed COVID-19 in Indianapolis, IN, 4/6 – 5/26/20                                                                                            | 5.5%  | COVID-19 severity was not examined                                                                                | Among 2,862 in the cohort who tested negative for COVID-19, the prevalence of asthma was 9.0% |
| Mendy, 2020 <sup>56</sup>    | Retrospective study of 689 adults with laboratory-confirmed COVID-19 in Ohio, Kentucky, and Indiana, 3/13 – 5/31/20                                                                          | 10.2% | Not hospitalized: 7.2% (n=473)<br>Hospitalized: 16.7% (n=216)<br>Not severe: 7.9% (n=598)<br>Severe: 25.3% (n=91) | Asthma was associated with COVID-19 severity in multivariable models                          |
| Keswani, 2020 <sup>57</sup>  | 1,043 patients with confirmed COVID-19 in Washington DC and Chicago (exact dates of assessment were not specified)                                                                           | 25.4% | Non-allergic (but not allergic) asthma was associated with increased intubation time                              | Neither mortality nor treatment regimen differed meaningfully between the two types of asthma |
| Arshad, 202 <sup>58</sup>    | A retrospective cohort study of 2,541 patients hospitalized and treated for COVID-19 in Southeast Michigan                                                                                   | 9.9%  |                                                                                                                   | Multivariable HR mortality for asthma = 0.916 (0.632 – 1.327)                                 |
| Suleyman, 2020 <sup>59</sup> | A case series of 463 consecutive patients with COVID-19 evaluated (but not all hospitalized) at several hospitals and emergency departments in metropolitan Detroit, Michigan, 3/9 – 3/27/20 | 15.8% | Discharged home: 18.5% (n=108)<br>Hospitalized: 14.8% (n=355)<br>No ICU: 15.9% (n=214)<br>ICU: 13.5% (n=141)      |                                                                                               |
| <b>Southern USA</b>          |                                                                                                                                                                                              |       |                                                                                                                   |                                                                                               |
| Gold, 2020 <sup>60</sup>     | Data were from a convenience sample of 305 hospitalized patients in metropolitan Atlanta, GA, 3/1 – 3/30/20                                                                                  | 10.5% | COVID-19 severity was not examined                                                                                | Most patients were African-American                                                           |

|                                   |                                                                                                                                                                                   |       |                                               |                                                                                                                    |
|-----------------------------------|-----------------------------------------------------------------------------------------------------------------------------------------------------------------------------------|-------|-----------------------------------------------|--------------------------------------------------------------------------------------------------------------------|
| Hussein, 2020 <sup>61</sup>       | Data from 495 patients with COVID-19 hospitalized in various locations in Louisiana, 3/15 – 6/9/20                                                                                | 14.5% | Survived: 15.1% (n=431)<br>Died: 10.9% (n=64) |                                                                                                                    |
| Price-Haywood, 2020 <sup>62</sup> | Retrospective cohort study of 3,481 adults with laboratory-confirmed COVID-19; 39.7% of the total sample were hospitalized with COVID-19 in New Orleans, Louisiana, 3/1 – 4/11/20 | 4.1%  | COVID-19 severity was not examined            |                                                                                                                    |
| Silver, 2020 <sup>63</sup>        | Retrospective study of 249 patients admitted to a hospital in New Orleans, Louisiana, with a positive test for COVID-19, 3/9 – 3/31/20                                            | 19.7% | COVID-19 severity was not examined            | Most patients were African-American                                                                                |
| <b>Other USA</b>                  |                                                                                                                                                                                   |       |                                               |                                                                                                                    |
| Bajaj, 2020 <sup>64</sup>         | A multicenter study of inpatients with COVID-19, including 108 patients without cirrhosis at various centers in the U.S. and Toronto, Canada, 3/23 – 5/21/20                      | 8.3%  | COVID-19 severity was not examined            | Only 9 participants had asthma in the “non-cirrhosis” category                                                     |
| Bramante, 2020 <sup>65</sup>      | A retrospective analysis of 6,256 individuals’ claims data from UnitedHealth Group’s Clinical Discovery Database, 1/1 – 6/7/20                                                    | 4.2%  | COVID-19 severity was not examined            |                                                                                                                    |
| Cates, 2020 <sup>66</sup>         | Electronic health records of 3,948 patients in the national Veterans Health Administration hospitalized with COVID-19, 3/1 – 5/31/20                                              | 6.9%  | COVID-19 severity was not examined            | The prevalence of asthma in patients with COVID-19 was significantly lower than that in patients hospitalized with |

|                           |                                                                                                                                                                                                                |       |                                                                                      |                                                                                       |
|---------------------------|----------------------------------------------------------------------------------------------------------------------------------------------------------------------------------------------------------------|-------|--------------------------------------------------------------------------------------|---------------------------------------------------------------------------------------|
|                           |                                                                                                                                                                                                                |       |                                                                                      | influenza (p<0.001)                                                                   |
| Garg, 2020 <sup>5</sup>   | COVID-NET database of laboratory-confirmed COVID-19–associated hospitalizations of 159 adults ≥ 18 years old in 14 U.S. states                                                                                 | 17.0% | COVID-19 severity was not examined                                                   | Prevalence of asthma higher than in the general U.S. population of 7.7% for asthma    |
| Gupta, 2020 <sup>67</sup> | Multicenter cohort study assessed 2,215 adults with laboratory-confirmed COVID-19 admitted to ICUs at 65 hospitals across the U.S. 3/4 – 4/4/20                                                                | 11.6% | Survived: 13.1% (n=1,431)<br>Died: 8.9% (n=784)                                      | All patients had severe COVID-19                                                      |
| Kim L, 2020 <sup>68</sup> | COVID-NET database of laboratory-confirmed COVID-19–associated hospitalizations of 2,484 adults ≥ 18 years old in 14 U.S. states, 3/1 – 5/2/20                                                                 | 12.6% | COVID-19 severity was not examined                                                   | 13.7% of patients with asthma were discharged with a diagnosis of asthma exacerbation |
| Ko, 2020 <sup>69</sup>    | Data from 5,416 people in the COVID-NET database, an all-age population-based surveillance system of laboratory-confirmed COVID-19-associated hospitalizations in various locations in the U.S., 3/1 – 6/23/20 | 13.0% | Asthma was associated with COVID-19-related hospitalization in a multivariable model |                                                                                       |
| Burn, 2020 <sup>70</sup>  | International study with 3,105 patients hospitalized with COVID-19 at various locations in the U.S., 3/1 – 4/20/20                                                                                             | 12.6% | COVID-19 severity was not examined                                                   |                                                                                       |
| Burn, 2020 <sup>71</sup>  | A cohort study 240,392 patients                                                                                                                                                                                | 13.5% | COVID-19 severity was not                                                            | There may be small overlap                                                            |

|                                    |                                                                                                                                                                                                                                         |       |                                                                                                                                               |                                                                                                                                                                                                |
|------------------------------------|-----------------------------------------------------------------------------------------------------------------------------------------------------------------------------------------------------------------------------------------|-------|-----------------------------------------------------------------------------------------------------------------------------------------------|------------------------------------------------------------------------------------------------------------------------------------------------------------------------------------------------|
|                                    | hospitalized with COVID-19 in six databases in the U.S.: HealthVerity, Premier, IQVIA Open Claims, Optum EHR, and Optum SES, up to 10/1/2020                                                                                            |       | examined                                                                                                                                      | of this study population with that of Burn et al <sup>70</sup> above.                                                                                                                          |
| <b>Canada</b>                      |                                                                                                                                                                                                                                         |       |                                                                                                                                               |                                                                                                                                                                                                |
| Sundaram, 2020 <sup>126</sup>      | An observational study of 25,030 adults with laboratory-confirmed COVID-19 using population-based laboratory and health administrative databases from Ontario, Canada, 3/1 – 6/20/20                                                    | 15.5% | COVID-19 severity was not examined                                                                                                            | The prevalence of asthma among 733,661 people who tested negative for COVID-19 was 18.6%                                                                                                       |
| <b>Mexico</b>                      |                                                                                                                                                                                                                                         |       |                                                                                                                                               |                                                                                                                                                                                                |
| Bello-Chavolla, 2020 <sup>72</sup> | Data from 101,238 individuals in the General Directorate of Epidemiology of the Mexican Ministry of Health, an open-source data set (prior to 6/3/20 - exact dates of assessment were not specified)                                    | 2.9%  | COVID-19 severity was not examined                                                                                                            |                                                                                                                                                                                                |
| Giannouchos, 2020 <sup>73</sup>    | Retrospective case of 89,756 individuals (97.9% were adults) with confirmed COVID-19 in a publicly available nation-level dataset from the Mexican Ministry of Health (prior to 5/31/20 - exact dates of assessment were not specified) | 2.9%  | Not hospitalized: 3.2% (n=58,485)<br>Hospitalized: 2.4% (n=31,271)<br>No adverse outcome: 3.0% (n=78,050)<br>Adverse outcome: 2.3% (n=11,706) | Differences between prevalence of asthma in all comparisons shown were statistically significant; asthma was inversely associated with COVID-19 diagnosis and severity in multivariable models |

|                                        |                                                                                                                                                                                                     |      |                                                                                                                                                                                                                                        |                                                                                                                                                           |
|----------------------------------------|-----------------------------------------------------------------------------------------------------------------------------------------------------------------------------------------------------|------|----------------------------------------------------------------------------------------------------------------------------------------------------------------------------------------------------------------------------------------|-----------------------------------------------------------------------------------------------------------------------------------------------------------|
| Hernandez-Galdamez, 2020 <sup>74</sup> | Cross-sectional study of 211,003 people with laboratory-confirmed COVID-19 reported by the Mexican Ministry of Health (prior to 6/27/20 - exact dates of assessment were not specified)             | 2.8% | Ambulatory: 3.0% (n=145,508)<br>Hospitalized: 2.3% (n=65,495)<br>No ICU: 2.3% (n=59,987)<br>ICU: 2.6% (n=5,508)<br>No Intubation: 2.3% (n=59,346)<br>Intubation: 1.9% (n=6,149)<br>Survived: 2.9% (n=185,075)<br>Died: 2.1% (n=25,928) | In multivariable models, asthma was a statistically significant protective factor for hospitalization (OR 0.83), intubation (OR 0.73) and death (OR 0.82) |
| Murillo-Zamora, 2020 <sup>156</sup>    | A nationwide retrospective cohort study of 66,123 adults with laboratory-confirmed COVID-19 in a web-based system for the epidemiological surveillance of viral respiratory diseases, 3/4 – 8/15/20 | N/A  | N/A                                                                                                                                                                                                                                    | Relative risk of death for asthma was 0.92 (0.85-0.99)                                                                                                    |
| Ortiz-Brizuela 2020 <sup>75</sup>      | Prospective cohort study of 309 patients with laboratory-confirmed COVID-19 in a tertiary care center in Mexico City, Mexico, 2/26 – 4/11/20                                                        | 2.9% | Outpatients: 4.1% (n=169)<br>Inpatients: 1.4% (n=140)<br>No ICU: 1.8% (n=111)<br>ICU: 0% (n=29)                                                                                                                                        | Only 9 participants had asthma                                                                                                                            |
| Solis, 2020 <sup>76</sup>              | Retrospective study of 7,497 who sought medical attention and tested positive for COVID-19 in Mexico (prior to 4/18/20 - exact dates of assessment were not specified)                              | 3.6% | Asthma was inversely associated with COVID-19 mortality in multivariable analyses (not statistically significant)                                                                                                                      |                                                                                                                                                           |
| <b>South America</b>                   |                                                                                                                                                                                                     |      |                                                                                                                                                                                                                                        |                                                                                                                                                           |
| Bisso, 2020 <sup>153</sup>             | Retrospective analysis of data from                                                                                                                                                                 | N/A  | Survived: 6.6% (n=122)                                                                                                                                                                                                                 | Only 9 participants had                                                                                                                                   |

|                               |                                                                                                                                                                             |      |                                                                     |                                                                                 |
|-------------------------------|-----------------------------------------------------------------------------------------------------------------------------------------------------------------------------|------|---------------------------------------------------------------------|---------------------------------------------------------------------------------|
|                               | 168 adults in the ICU with COVID-19 in Buenos Aries, Argentina, 3/15 – 9/15/20                                                                                              |      | Died: 2.2% (n=46)                                                   | asthma                                                                          |
| Baqui, 2020 <sup>154</sup>    | A cross-sectional study of COVID-19 hospital mortality using data from 7,371 patients in the SIVEP-Gripe dataset in Brazil, 2/27 – 5/4/20                                   | N/A  | Survived: 4.5% (n=4,043)<br>Died: 3.0% (n=3,328)                    |                                                                                 |
| de Souza, 2020 <sup>127</sup> | A retrospective analysis of data from 63,873 people with COVID-19 and information on asthma in the Brazilian Ministry of Health Database, 2/26 – 8/10/20                    | 7.2% | N/A                                                                 | Multivariate RR of mortality for asthma was 0.82 (0.76-0.88)                    |
| Porto, 2020 <sup>128</sup>    | 410 in Brazil, 3/18 – 4/8/20                                                                                                                                                | 6.3% | COVID-19 severity was not examined                                  | Asthma prevalence among 763 participants testing negative for COVID-19 was 8.9% |
| Sardinha, 2020 <sup>129</sup> | A cross-sectional study of 1,207 people of indigenous ethnicity with confirmed COVID-19 in Brazil, 1/1 - 8/31/20                                                            | 1.9% | Survived: 1.8% (n=737)<br>Died: 2.1% (n=470)                        |                                                                                 |
| Santos, 2020 <sup>158</sup>   | A retrospective, multicenter cohort study of 46,285 hospitalized patients with COVID-19 in the public national epidemiological surveillance system in Brazil, 2/20 – 6/2/20 | N/A  | Asthma prevalence by category of COVID-19 severity was not provided | Multivariable OR of mortality for asthma was 0.66 (0.61-0.73)                   |
|                               |                                                                                                                                                                             |      |                                                                     |                                                                                 |



|                               |                                                                                                                                             |       |                                                               |                                                                                                                                                     |
|-------------------------------|---------------------------------------------------------------------------------------------------------------------------------------------|-------|---------------------------------------------------------------|-----------------------------------------------------------------------------------------------------------------------------------------------------|
| <b>Europe</b>                 |                                                                                                                                             |       |                                                               |                                                                                                                                                     |
| <b>UK / Ireland</b>           |                                                                                                                                             |       |                                                               |                                                                                                                                                     |
| Alkundi, 2020 <sup>77</sup>   | A retrospective cross-sectional study of 232 patients hospitalized in Ashford, UK, 3/10 – 5/10/20 with laboratory-confirmed severe COVID-19 | 2.6%  | Survived: 3.2% (n=63)<br>Died: 0% (n=24)                      | Only 6 cases with asthma; severity analyses included only patients with diabetes                                                                    |
| Atkins, 2020 <sup>155</sup>   | 507 adults > 65 hospitalized with confirmed COVID-19 in the UK Biobank cohort, 3/16 – 4/26/20                                               | N/A   | Multivariable RR of mortality for asthma was 0.59 (0.33–1.04) | This study used data from the same underlying study population as Chudasama et al <sup>79</sup> (below)                                             |
| Cavallaro, 2020 <sup>78</sup> | A cohort study of 13,954 patients hospitalized with laboratory-confirmed COVID-19 in the UK, dates of testing unclear                       | 8.4%  |                                                               | Adjusted OR of mortality for asthma was 0.87 (0.75 – 1.01)                                                                                          |
| Chudasama, 2020 <sup>79</sup> | A prospective cohort study of 1,706 adult participants in the UK Biobank Study with confirmed COVID-19, 3/16 – 7/26/20                      | 13.2% | COVID-19 severity was not examined                            | Among 358,577 UK Biobank participants, either testing negative or untested (presumed mostly negative for COVID-19), the asthma prevalence was 11.5% |
| Goodacre, 2020 <sup>80</sup>  | A retrospective cohort of 5,768 patients seen at emergency departments in UK who tested positive for COVID-19, 3/26 – 5/28/20               | 13.3% | COVID-19 severity was not examined                            | Among 8,229 patients who tested negative for COVID-19 or who were not tested, the prevalence of asthma was 15.5%                                    |

|                                    |                                                                                                                                       |       |                                                                                                          |                                                                                                                       |
|------------------------------------|---------------------------------------------------------------------------------------------------------------------------------------|-------|----------------------------------------------------------------------------------------------------------|-----------------------------------------------------------------------------------------------------------------------|
| Sapey, 2020 <sup>81</sup>          | A retrospective cohort study of 2,217 patients with laboratory-confirmed COVID-19 in the UK, 3/10 – 4/17/20                           | 19.8% | Survived: 20.4% (n=1,448)<br>Died: 18.6% (n=769)                                                         |                                                                                                                       |
| Thompson, 2020 <sup>82</sup>       | A retrospective cohort study of 470 adults admitted with laboratory-confirmed COVID-19 in the UK, 3/12 – 5/19/20                      | 10.0% | Survived: 12.0% (n=301)<br>Died: 6.5% (n=169)                                                            | Multivariable RR of mortality for asthma was 0.51 (0.25 – 1.04)                                                       |
| Docherty, 2020 <sup>83</sup>       | Data from a prospective observational cohort of 16,749 adults hospitalized in the UK, 2/6 – 4/18/20                                   | 14%*  | Asthma not associated with inpatient death from COVID-19                                                 | 3.1% were under the age of 18                                                                                         |
| Butler, 2020 <sup>84</sup>         | Retrospective analysis of 193 consecutive hospital admissions with COVID-19 in Ireland (exact dates of assessment were not specified) | 8.8%  | COVID-19 severity was not examined                                                                       | Most had a “milder clinical course” and none required mechanical ventilation. There was one death related to COVID-19 |
| <b>Spain</b>                       |                                                                                                                                       |       |                                                                                                          |                                                                                                                       |
| Berenguer, 2020 <sup>85</sup>      | A retrospective cohort study of 4,000 patients admitted to hospitals across Spain with laboratory-confirmed COVID-19, through 3/17/20 | 7.5%  | Survived: 8.0% (n=2,884)<br>Died: 6.2% (n=1,116)                                                         |                                                                                                                       |
| Bermejo-Martin, 2020 <sup>86</sup> | A prospective study of 250 adults with laboratory-confirmed COVID-19 in Spain, 3/16 – 4/15/20                                         | 4.8%  | Not hospitalized: 8.0% (n=50)<br>Hospitalized: 4.0% (n=200)<br>No ICU: 6.0% (n=100)<br>ICU: 2.0% (n=100) |                                                                                                                       |

|                                     |                                                                                                                                           |       |                                                                                                                                                                               |                                                                                                      |
|-------------------------------------|-------------------------------------------------------------------------------------------------------------------------------------------|-------|-------------------------------------------------------------------------------------------------------------------------------------------------------------------------------|------------------------------------------------------------------------------------------------------|
| Soria, 2020 <sup>87</sup>           | A retrospective cohort of 448 people with laboratory-confirmed COVID-19 in Spain; the time period of data collection was not clear        | 6.5%  | Not severe: 7.8% (n=102)<br>Severe: 6.1% (n=346)                                                                                                                              |                                                                                                      |
| Borobia, 2020 <sup>88</sup>         | A cohort of 2,226 hospitalized adults with confirmed COVID-19 in Madrid, Spain, 2/25 – 4/19/20                                            | 5.2%  | Survived: 5.5% (n=1,766)<br>Died: 3.7% (n=460)                                                                                                                                |                                                                                                      |
| Garcia-Pachon, 2020 <sup>89</sup>   | Retrospective study of 376 people over age 14 with laboratory-confirmed COVID-19 in Spain, 3/3 – 4/12/20                                  | 2.7%  | Not hospitalized: 2.8% (n=218)<br>Hospitalized: 2.5% (n=158)                                                                                                                  | A total of 10 participants with asthma; COVID-19 did not appear to be related to asthma exacerbation |
| Poblador-Plou, 2020 <sup>90</sup>   | Retrospective cohort study of 771 people with laboratory-confirmed infection by SARS-CoV-2 in the Spanish region of Aragon, 3/4 – 4/17/20 | 3.2%  | Multivariable analyses showed asthma was associated with a statistically non-significant 55% and 32% decreased risk of mortality from COVID-19 in men and women, respectively | Only 25 participants with asthma                                                                     |
| Prieto-Alhambra, 2020 <sup>91</sup> | 121,263 people $\geq$ 15 years with confirmed COVID-19 obtained from population-based registries in Catalonia, Spain, 3/15 – 4/24/20      | 6.8%  | COVID-19 severity was not examined                                                                                                                                            |                                                                                                      |
| San-Juan, 2020 <sup>92</sup>        | Retrospective study of 32 pregnant women with COVID-19 in Madrid, Spain, 3/5 – 4/5/20                                                     | 12.4% | COVID-19 severity was not examined                                                                                                                                            | Only 4 participants with asthma                                                                      |
| Burn, 2020 <sup>70</sup>            | International study with 18,425 patients hospitalized with COVID-19 in Spain, 3/1 – 4/20/20                                               | 6.6%  | COVID-19 severity was not examined                                                                                                                                            |                                                                                                      |

|                                  |                                                                                                                      |       |                                              |                                                                                                                                                                      |
|----------------------------------|----------------------------------------------------------------------------------------------------------------------|-------|----------------------------------------------|----------------------------------------------------------------------------------------------------------------------------------------------------------------------|
|                                  |                                                                                                                      |       |                                              |                                                                                                                                                                      |
| <b>France</b>                    |                                                                                                                      |       |                                              |                                                                                                                                                                      |
| Beurneir, 2020 <sup>93</sup>     | 768 adults hospitalized with COVID-19 pneumonia in Paris, France, 3/15 – 4/15/20                                     | 4.8%  | COVID-19 severity was not examined           | Patients with asthma were slightly younger and had fewer comorbidities than patients without asthma                                                                  |
| Grandbastien, 2020 <sup>94</sup> | 114 patients hospitalized with pneumonia related to COVID-19 in eastern France, 3/4 – 4/6/20                         | 21.7% | COVID-19 severity was not examined           | Co-morbidities (obesity, diabetes, heart disease, sleep apnea, not associated with asthma); SARS-CoV-2 pneumonia did not appear to induce severe asthma exacerbation |
| <b>Italy</b>                     |                                                                                                                      |       |                                              |                                                                                                                                                                      |
| Barroso, 2020 <sup>95</sup>      | A retrospective study of 189 adults hospitalized with laboratory-confirmed COVID-19 in Northern Italy, 3/1 – 3/21/20 | 5.8%  | COVID-19 severity was not examined           |                                                                                                                                                                      |
| Caminati, 2020 <sup>96</sup>     | Data from 1,348 people hospitalized with COVID-19 in Verona and Brescia in northeast Italy, 3/1 – 4/30/20            | 1.9%  | COVID-19 severity was not examined           | The prevalence of asthma in the region's general population is 6%                                                                                                    |
| Lombardi, 2020 <sup>97</sup>     | Retrospective study of 1,043 patients hospitalized with COVID-19 in Brescia, Italy, 2/20 – 4/20/20                   | 1.9%  | Survived: 2.2% (n=810)<br>Died: 0.9% (n=233) | Only 20 participants with asthma; patients with asthma had a lower risk of mortality from COVID-19 than those without asthma (10.0% vs. 22.6%)                       |

| <b>Other Europe</b>            |                                                                                                                                                                                             |       |                                                                                           |                                                                                                 |
|--------------------------------|---------------------------------------------------------------------------------------------------------------------------------------------------------------------------------------------|-------|-------------------------------------------------------------------------------------------|-------------------------------------------------------------------------------------------------|
| Calmes, 2020 <sup>98</sup>     | Data from the medical records of 595 adult patients hospitalized in Liege, Belgium, with COVID-19, 3/18 – 4/17/20                                                                           | 9.6%  | No ICU: 9.3% (n=508)<br>ICU: 11.4% (n=88)<br>Survived: 10.4% (n=509)<br>Died: 4.6% (n=87) | Relative risk of death for asthma patients was 0.74 (0.24 – 2.3)                                |
| Gregoriano, 2020 <sup>99</sup> | A retrospective cohort study of 99 adults admitted to hospital with COVID-19 in Switzerland, 2/26 – 4/30/20                                                                                 | 16.2% | Not severe: 17.2% (n=64)<br>Severe: 14.3% (n=35)                                          |                                                                                                 |
| Regina, 2020 <sup>100</sup>    | Retrospective observational study of 200 adult patients hospitalized in western Switzerland with confirmed COVID-19 3/1 – 3/25/20                                                           | 4.0%  | No ventilation: 4.3% (n=163)<br>Ventilation: 2.7% (n=37)                                  | Only 8 people with asthma                                                                       |
| Avdeev, 2020 <sup>101</sup>    | A retrospective study assessing the prevalence of asthma among 1,307 ICU patients with COVID-19 in Russia who required mechanical ventilation; exact dates of assessment were not specified | 1.8%  | All had severe disease requiring mechanical ventilation                                   | The prevalence of asthma in this study population did not exceed that in the general population |
| Meyer, 2020 <sup>102</sup>     | Retrospective study of 101 patients with COVID-19 admitted to a Danish hospital (February and March, but exact dates of assessment were not specified)                                      | 14.9% | No ICU: 14.8% (n=81)<br>ICU: 15.0% (n=20)<br>Survived: 16.9% (n=71)<br>Died: 10.0% (n=30) | Only 3 participants with asthma died                                                            |
| Myrstad, 2020 <sup>103</sup>   | A prospective cohort study of 66 patients with laboratory-confirmed                                                                                                                         | 10.6% | Not severe: 13.7% (n=51)<br>Severe: 0% (n=15)                                             | Only 7 participants with asthma                                                                 |

|                                 |                                                                                                                                  |       |                                                                                     |                                                                 |
|---------------------------------|----------------------------------------------------------------------------------------------------------------------------------|-------|-------------------------------------------------------------------------------------|-----------------------------------------------------------------|
|                                 | COVID-19 in eastern Norway, 3/9 – 4/27/20                                                                                        |       |                                                                                     |                                                                 |
| Ottenhoff, 2020 <sup>104</sup>  | A retrospective cohort study of 2,218 adults with laboratory-confirmed COVID-19 admitted to a hospital in Holland, 2/27 – 6/8/20 | 10.4% | Favorable (not severe): 11.0%<br>(n=1,703)<br>Unfavorable (severe): 8.3%<br>(n=516) |                                                                 |
| Peixoto, 2020 <sup>105</sup>    | A retrospective cohort study of 20,293 (mostly adult) people with laboratory-confirmed COVID-19 in Portugal, up to 4/28/20       | 1.4%  | Survived: 1.4% (n=19,768)<br>Died: 0.6% (n=502)                                     | Multivariable RR of mortality for asthma was 0.73 [0.24 - 2.23] |
| Giannoglou, 2020 <sup>106</sup> | A retrospective analysis of data from 512 people admitted to hospitals in the Attica region of Greece, 2/21 – 6/30/20            | 13.9% | Survived: 14.2% (n=431)<br>Died: 12.3% (n=81)                                       |                                                                 |
| <b>Asia</b>                     |                                                                                                                                  |       |                                                                                     |                                                                 |
| <b>China</b>                    |                                                                                                                                  |       |                                                                                     |                                                                 |
| Guan, 2020 <sup>107</sup>       | Data from 1,099 hospitalized patients with laboratory-confirmed COVID-19 in China, 12/11/19 – 1/29/20                            | 0%    | COVID-19 severity was not examined                                                  | No participants with asthma                                     |
| Huang C, 2020 <sup>108</sup>    | 41 patients hospitalized with laboratory-confirmed COVID-19 in Wuhan, China, 12/16/19 – 1/2/20                                   | 0%    | COVID-19 severity was not examined                                                  | No participants with asthma                                     |

|                              |                                                                                                                                     |       |                                                  |                                                                                           |
|------------------------------|-------------------------------------------------------------------------------------------------------------------------------------|-------|--------------------------------------------------|-------------------------------------------------------------------------------------------|
| Huang Y, 2020 <sup>109</sup> | Retrospective analysis of data from 34 patients hospitalized with laboratory-confirmed COVID-19 in Wuhan, China, 12/21/19 – 1/28/20 | 0%    | COVID-19 severity was not examined               | No participants with asthma                                                               |
| Li, 2020 <sup>110</sup>      | 548 patients diagnosed with COVID-19 admitted to a hospital in Wuhan, China, 1/26 – 2/5/20                                          | 0.9%  | Not severe: 0.7% (n=279)<br>Severe: 1.1% (n=269) | Only 5 participants with asthma                                                           |
| Song, 2020 <sup>111</sup>    | Retrospective study of 961 adults hospitalized with laboratory-confirmed COVID-19 in Wuhan, China, 2/1 – 3/6/20                     | 2.3%  | Not severe: 2.9% (n=719)<br>Severe: 0.4% (n=242) |                                                                                           |
| Shi, 2020 <sup>112</sup>     | Medical records from 65 patients with laboratory-confirmed COVID-19 at a hospital in Wuhan, China, 2/1 – 3/8/20                     | 3.1%  | COVID-19 severity was not examined               |                                                                                           |
| Wang W, 2020 <sup>113</sup>  | Retrospective study of 123 patients hospitalized in the ICU with laboratory-confirmed COVID-19 in Wuhan, China, 2/10 – 3/27/20      | 0.8%  | Not critical: 1.4% (n=73)<br>Critical: 9% (n=50) | Only one participant with asthma                                                          |
| Wang J, 2020 <sup>114</sup>  | A retrospective case study of 562 patients with COVID -19 in several provinces in China, 1/28 – 2/25/20                             | 12.1% | Non severe: 9.0% (n=509)<br>Severe: 41.5% (n=53) | Covid-19 diagnosis used various methods, with potential for false positives and negatives |
| Yang S, 2020 <sup>115</sup>  | A retrospective cohort study of 463 adults hospitalized with laboratory-confirmed COVID-19 in Wuhan, China, 2/13 – 3/14/20          | 1.5%  | Not severe: 1.5% (n=397)<br>Severe: 1.5% (n=66)  | Only 7 participants had asthma; the prevalence of asthma was relatively low               |

|                               |                                                                                                                                                                                                                              |      |                                                  |                                                                                                                             |
|-------------------------------|------------------------------------------------------------------------------------------------------------------------------------------------------------------------------------------------------------------------------|------|--------------------------------------------------|-----------------------------------------------------------------------------------------------------------------------------|
|                               |                                                                                                                                                                                                                              |      |                                                  |                                                                                                                             |
| Wei, 2020 <sup>116</sup>      | A cluster of 14 infected health care workers from a hospital in Wuhan, China, 12/25/19 – 1/31/20                                                                                                                             | 7.1% | COVID-19 severity was not examined               | Only one participant with asthma                                                                                            |
| Zhang, 2020 <sup>117</sup>    | 140 patients in hospital with laboratory confirmed COVID-19 In China, 1/16 – 2/3/20                                                                                                                                          | 0%   | COVID-19 severity was not examined               | No participant with asthma                                                                                                  |
| <b>South Korea</b>            |                                                                                                                                                                                                                              |      |                                                  |                                                                                                                             |
| Choi, YJ, 2020 <sup>118</sup> | 7,590 patients with laboratory-confirmed COVID-19 in the Ministry of Health and Welfare of Korea nationwide patient medical claims database in South Korea (prior to 5/15/20 - exact dates of assessment were not specified) | 2.9% | Survived: 2.7% (n = 7363)<br>Died: 7.5% (n=277)  | Asthma was not a statistically significant risk factor for increased mortality in COVID-19 patients in multivariable models |
| Choi HG, 2020 <sup>119</sup>  | Data from 4,057 hospitalized patients across South Korea with COVID-19 collected by the Korea Centers for Disease Control and Prevention (dates of data collection were not specified)                                       | 2.4% | Survived: 3.0% (n=3,931)<br>Died: 6.3% (n=126)   | Relative risk of death for asthma patients was 2.20 (95% CI = 1.02-4.76)                                                    |
| Lee S, 2020 <sup>120</sup>    | A retrospective evaluation of 303 symptomatic and asymptomatic patients with SARS-CoV-2 infection in South Korea, 3/6-3/26-2020                                                                                              | 0.3% | Not enough cases with asthma to analyze severity | Only 1 participant with asthma                                                                                              |
| Lee SC, 2020 <sup>121</sup>   | A retrospective cohort study using                                                                                                                                                                                           | 9.4% | Not admitted: 9.5% (n=461)                       |                                                                                                                             |



|                             |                                                                                                                                                                                         |       |                                                                                                                                    |                                                                                           |
|-----------------------------|-----------------------------------------------------------------------------------------------------------------------------------------------------------------------------------------|-------|------------------------------------------------------------------------------------------------------------------------------------|-------------------------------------------------------------------------------------------|
|                             | data from 7,272 adults with confirmed COVID-19 in a nationwide administrative claims database, 1/20 – 5/27/20                                                                           |       | Admitted: 9.4% (n=6,811)<br>Not severe: 9.0% (n=6,901)<br>Severe: 17.0% (n=371)<br>Survived: 9.1% (n=7,045)<br>Died: 19.4% (n=227) |                                                                                           |
| Kim D, 2020 <sup>122</sup>  | 9,149 people in the South Korean Centers for Disease Control and Prevention database with confirmed COVID-19 in Korea (prior to 3/26/20 - exact dates of assessment were not specified) | 16.9% | COVID-19 severity was not examined                                                                                                 |                                                                                           |
| Kim ES, 2020 <sup>123</sup> | The first 28 patients enrolled in a nationwide retrospective cohort study of hospitalized individuals in South Korea, 1/19 – 2/17/20                                                    | 3.6%  | COVID-19 severity was not examined                                                                                                 | Only 1 participant with asthma                                                            |
| Kim S, 2020 <sup>124</sup>  | 2,200 adults hospitalized in Daegu, Korea, with COVID-19, 2/20 – 3/20                                                                                                                   | 3.2%  | Asthma was not a risk factor for mortality from COVID-19 in multivariable analyses                                                 | The OR of death for asthma was 1.66 (0.62 – 4.40)                                         |
| Yang, 2020 <sup>125</sup>   | Data from 7,340 people with a diagnosis of COVID-19 in the South Korean national health insurance claims-based database, 1/1 – 5/15/20                                                  | 9.9%  | Non-allergic asthma increased COVID-19 severity in multivariable models, but not allergic asthma                                   | The prevalence of asthma in people in the cohort who tested negative was 15.1% (n=32,120) |
| Burn, 2020 <sup>70</sup>    | International study with 7,341 patients hospitalized with COVID-19 in South Korea, 3/1 – 4/20/20                                                                                        | 12.0% | COVID-19 severity was not examined                                                                                                 |                                                                                           |

| <b>Other Asia</b>             |                                                                                                                                                   |       |                                                                 |                                  |
|-------------------------------|---------------------------------------------------------------------------------------------------------------------------------------------------|-------|-----------------------------------------------------------------|----------------------------------|
| Aggarwal, 2020 <sup>130</sup> | 32 adults with COVID-19 admitted to a hospital in New Delhi, India, 4/10 – 4/30/20                                                                | 6.3%  | Non-severe pneumonia: 0% (n=8)<br>Severe pneumonia: 8.3% (n=24) | Only 2 participants with asthma  |
| Goel, 2020 <sup>131</sup>     | A retrospective study of 35 patients with COVID-19 admitted to a hospital in New Delhi, 5/8 – 7/3/20                                              | 11.4% | COVID-19 severity was not examined                              | Only 4 participants with asthma  |
| Morshed, 2020 <sup>132</sup>  | A cross-sectional study of 103 patients with laboratory-confirmed COVID-19 in Bangladesh, 7/5 – 7/18/20                                           | 5.8%  | Mild and Moderate: 5.7% (n=87)<br>Severe: 6.3% (n=16)           | Only 6 participants with asthma  |
| Saha, 2020 <sup>133</sup>     | A retrospective cohort study of 168 (mostly adult) patients with laboratory-confirmed COVID-19 admitted to a hospital in Bangladesh, 4/1 – 8/7/20 | 8.9%  | Survived: 16.4% (n=73)<br>Died: 3.2% (n=95)                     | Only 18 participants with asthma |
| Haw, 2020 <sup>134</sup>      | A retrospective study of data from 8,212 (mostly adult) patient with laboratory-confirmed COVID-19 in the Philippines, up to 4/29/20              | 3.2%  | Survived: 4.9% (n=2,988)<br>Died: 2.9% (n=768)                  |                                  |
| Higuchi, 2020 <sup>135</sup>  | A retrospective cohort study of 57 adults hospitalized with laboratory-confirmed COVID-19 in Japan, 2/20 – 6/10/20                                | 14.0% | Not severe: 16.0% (n=50)<br>Severe: 0% (n=7)                    | Only 8 participants had asthma   |
| Uchida, 2020 <sup>136</sup>   | A retrospective cohort study of 35 adults hospitalized with laboratory-                                                                           | 2.9%  | Not severe: 0% (n=27)<br>Severe: 12.5% (n=8)                    | Only 1 participant with asthma   |

|                                |                                                                                                                         |            |                                                                |                                 |
|--------------------------------|-------------------------------------------------------------------------------------------------------------------------|------------|----------------------------------------------------------------|---------------------------------|
|                                | confirmed COVID-19 in Moroyama, Japan, March – June, 2020                                                               |            |                                                                |                                 |
| <b>Africa</b>                  |                                                                                                                         |            |                                                                |                                 |
| Ashinyo, 2020 <sup>137</sup>   | A retrospective review of data from 307 discharged COVID-19 patients in Ghana, 3/23 – 6/29/20                           | 2.0%       | COVID-19 severity was not examined                             | Only 6 participants with asthma |
| Ombajo, 2020 <sup>138</sup>    | A multicenter cohort study of 787 patients hospitalized with laboratory-confirmed COVID-19 in Kenya, 3/14 – 9/17/20     | N/A        | Univariate OR of time to death for asthma was 1.06 (0.26-4.26) |                                 |
| Otuonye, 2020 <sup>139</sup>   | A case series of 154 patients with laboratory-confirmed COVID-19 in Nigeria, 6/1 – 8/30/20                              | 2.6%       | COVID-19 severity was not examined                             | Only 4 participants had asthma  |
| Leulseged, 2020 <sup>140</sup> | A prospective cohort study of 1,345 patients hospitalized with laboratory-confirmed COVID-19 in Ethiopia, 7/1 – 9/30/20 | 4.1%       | COVID-19 severity was not examined                             |                                 |
| <b>Middle East</b>             |                                                                                                                         |            |                                                                |                                 |
| Alizadehsani,                  | A prospective study of 319 patients                                                                                     | C-19+ 1.6% | Survived: 1.9% (n=108)                                         | No laboratory confirmation      |

|                                   |                                                                                                                                                                                             |            |                                                                                                |                                                                                    |
|-----------------------------------|---------------------------------------------------------------------------------------------------------------------------------------------------------------------------------------------|------------|------------------------------------------------------------------------------------------------|------------------------------------------------------------------------------------|
| 2020 <sup>141</sup>               | in Iran with flu-like symptoms referred to a tertiary hospital in Iran; COVID-19 was diagnosed through CT imaging only. 123 were considered to have COVID-19 and 196 were not. 3/3 – 4/8/20 | C-19- 3.1% | Died: 0% (n=15)                                                                                | of COVID-19 diagnosis                                                              |
| Shahriaridad, 2020 <sup>142</sup> | A retrospective cohort study of 113 adults with laboratory-confirmed COVID-19 in Iran, 2/20 – 3/20/20                                                                                       | 6.2%       | Not severe: 5.9% (n=102)<br>Severe: 9.1% (n=11)<br>Survived: 5.8% (n=104)<br>Died: 11.1% (n=9) | Only 9 participants died                                                           |
| Almazeedi, 2020 <sup>143</sup>    | 1,096 patients with laboratory-confirmed COVID-19 admitted to a hospital in Kuwait, 2/24 – 4/20/20                                                                                          | 3.9%       | No ICU: 3.5% (n=1,054)<br>ICU: 14.3% (n=42)<br>Survived: 3.6% (n=1,077)<br>Died: 21.1% (n=19)  | Multivariable OR of mortality for asthma was 4.92 (1.03-23.44)                     |
| Caliskan, 2020 <sup>144</sup>     | A retrospective study of 565 patients hospitalized with COVID-19 in Istanbul, Turkey, 3/15 – 5/10/20                                                                                        | 3.7%       | No ICU: 3.6% (n=474)<br>ICU: 4.4% (n=91)<br>Survived: 3.5% (n=490)<br>Died: 5.3% (n=75)        | The prevalence of asthma in 248 patients hospitalized with other diseases was 3.2% |
| Satici, 2020 <sup>145</sup>       | A retrospective cohort study of 681 adults hospitalized with laboratory-confirmed COVID-19 in Istanbul, Turkey, 4/2 – 5/1/20                                                                | 6.3%       | Survived: 6.7% (n=626)<br>Died: 1.8% (n=55)                                                    |                                                                                    |
| Trabulus, 2020 <sup>146</sup>     | A retrospective cohort study of 336 adults with laboratory-confirmed COVID-19 in Istanbul, Turkey, 3/15 – 5/1/20                                                                            | 6.0%       | Survived: 6.5% (n=293)<br>Died: 2.3 (n=43)                                                     | Only 20 participants with asthma                                                   |
| Green, 2020 <sup>147</sup>        | A retrospective cross-sectional                                                                                                                                                             | 6.8%       | Not hospitalized: 6.6% (n=2,076)                                                               |                                                                                    |

|                                  |                                                                                                                                                                                        |      |                                                                    |                                                                                                      |
|----------------------------------|----------------------------------------------------------------------------------------------------------------------------------------------------------------------------------------|------|--------------------------------------------------------------------|------------------------------------------------------------------------------------------------------|
|                                  | study of 2,266 people with COVID-19 and 35,203 people who tested negative: data from a nationwide HMO in Israel, 2/1 – 6/20/20                                                         |      | Hospitalized: 8.9% (n=190)                                         |                                                                                                      |
| Israel, 2020 <sup>148</sup>      | A study of 26,959 adults hospitalized with COVID-19 in Israel, up to 10/10/20                                                                                                          | 6.4% | Not hospitalized: 6.1% (n=30,010)<br>Hospitalized: 6.2% (n=13,121) | Among 31,010 untested controls (presumed mostly without COVID-19), the prevalence of asthma was 6.1% |
| Israel, 2020 <sup>149</sup>      | A retrospective cohort study of 4,151 adult members of a large health provider in Israel with laboratory-confirmed COVID-19 from the beginning of the disease outbreak until 5/16/2020 | 4.7% |                                                                    | The prevalence of asthma in 20,755 cohort members who tested negative for COVID-19 was 6.2%          |
| Shabrawishi, 2020 <sup>150</sup> | Retrospective case series of 150 patients hospitalized with laboratory-confirmed COVID-19 in Saudi Arabia, 3/12 – 3/31/20                                                              | 2.7% | Not severe: 2.2% (n=134)<br>Severe/ICU: 7.7% (n=16)                | Only 4 participants with asthma                                                                      |

\* Prevalence was presented in whole numbers

## SUPPLEMENTAL TABLE E2

Pooled Prevalence per country/city

South Korea prevalence

| Study                  | Sample size | Proportion (%) | 95% CI           | Weight (%) |        |
|------------------------|-------------|----------------|------------------|------------|--------|
|                        |             |                |                  | Fixed      | Random |
| Choi, 2020             | 7590        | 2.899          | 2.533 to 3.301   | 20.00      | 13.28  |
| Choi, 2020             | 4057        | 2.391          | 1.943 to 2.909   | 10.69      | 13.25  |
| Kim, 2020              | 9148        | 16.898         | 16.135 to 17.682 | 24.11      | 13.28  |
| Kim, 2020              | 28          | 3.571          | 0.0904 to 18.348 | 0.076      | 7.94   |
| Kim, 2020              | 2200        | 3.182          | 2.489 to 4.003   | 5.80       | 13.19  |
| Lee, 2020              | 303         | 0.330          | 0.00836 to 1.825 | 0.80       | 12.50  |
| Lee, 2020              | 7272        | 9.406          | 8.745 to 10.100  | 19.17      | 13.28  |
| Yang, 2020             | 7340        | 9.905          | 9.230 to 10.611  | 19.35      | 13.28  |
| Total (fixed effects)  | 37938       | 7.956          | 7.686 to 8.233   | 100.00     | 100.00 |
| Total (random effects) | 37938       | 5.373          | 2.328 to 9.579   | 100.00     | 100.00 |

### Test for heterogeneity

|                                |                |
|--------------------------------|----------------|
| Q                              | 1579.6982      |
| DF                             | 7              |
| Significance level             | P < 0.0001     |
| I <sup>2</sup> (inconsistency) | 99.56%         |
| 95% CI for I <sup>2</sup>      | 99.46 to 99.64 |

Prevalence – 5.37% (2.33% - 9.58%).

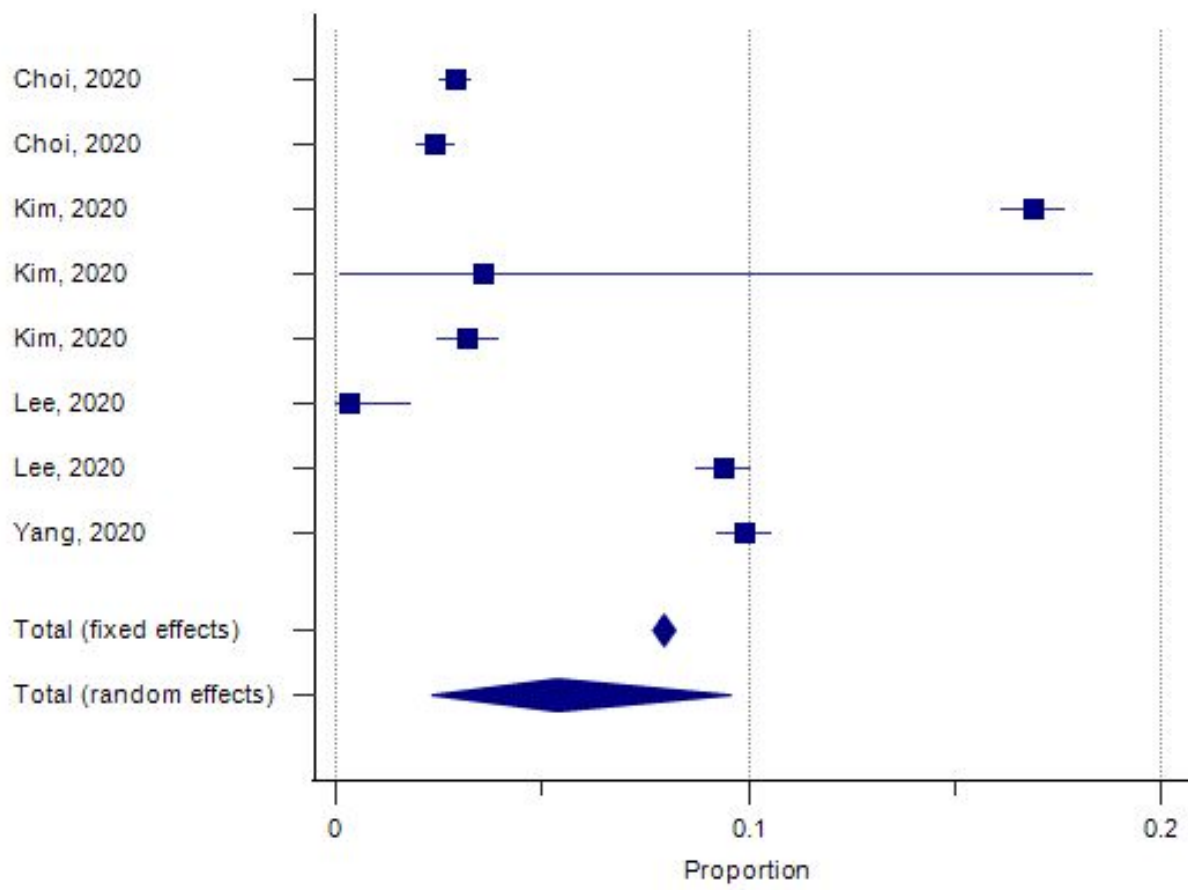

## China Prevalence

| Study                  | Sample size | Proportion (%) | 95% CI          | Weight (%) |        |
|------------------------|-------------|----------------|-----------------|------------|--------|
|                        |             |                |                 | Fixed      | Random |
| Guan, 2020             | 1099        | 0.000          | 0.000 to 0.335  | 27.09      | 10.72  |
| Huang, 2020            | 41          | 0.000          | 0.000 to 8.604  | 1.03       | 7.53   |
| Huang, 2020            | 34          | 0.000          | 0.000 to 10.282 | 0.86       | 7.09   |
| Li, 2020               | 548         | 0.912          | 0.297 to 2.116  | 13.52      | 10.54  |
| Shi, 2020              | 65          | 3.077          | 0.375 to 10.677 | 1.63       | 8.48   |
| Song, 2020             | 961         | 2.289          | 1.440 to 3.446  | 23.69      | 10.70  |
| Wang, 2020             | 123         | 0.813          | 0.0206 to 4.446 | 3.05       | 9.47   |
| Wang, 2020             | 562         | 12.100         | 9.520 to 15.086 | 13.86      | 10.55  |
| Wei, 2020              | 14          | 7.143          | 0.181 to 33.868 | 0.37       | 4.83   |
| Yang, 2020             | 463         | 1.512          | 0.610 to 3.090  | 11.43      | 10.48  |
| Zhang, 2020            | 140         | 0.000          | 0.000 to 2.601  | 3.47       | 9.62   |
| Total (fixed effects)  | 4050        | 1.645          | 1.276 to 2.085  | 100.00     | 100.00 |
| Total (random effects) | 4050        | 1.881          | 0.397 to 4.433  | 100.00     | 100.00 |

## Test for heterogeneity

|                                |                |
|--------------------------------|----------------|
| Q                              | 186.0550       |
| DF                             | 10             |
| Significance level             | P < 0.0001     |
| I <sup>2</sup> (inconsistency) | 94.63%         |
| 95% CI for I <sup>2</sup>      | 92.11 to 96.34 |

Prevalence – 1.88 (95% CI 0.40 – 4.43). Significant heterogeneity, p < 0.0001.



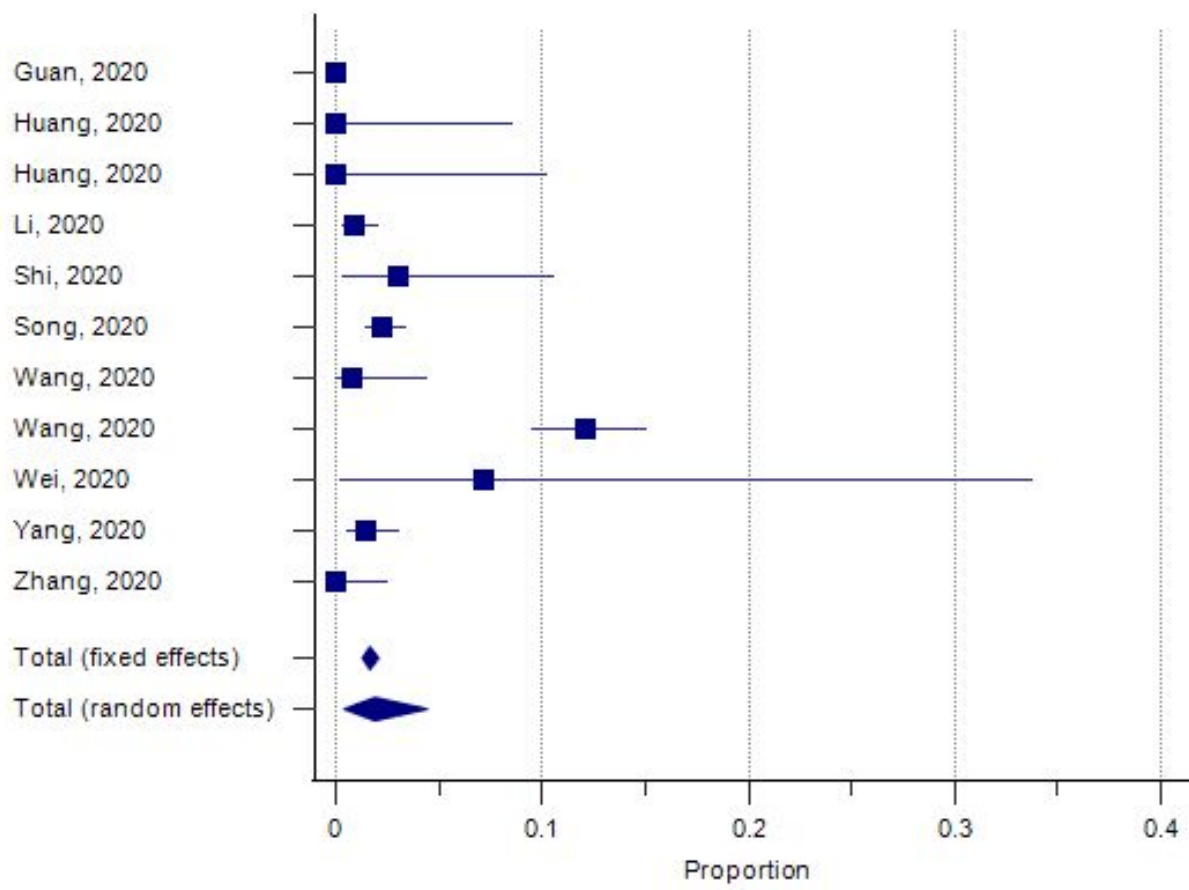

## Europe Prevalence

| Study                  | Sample size | Proportion (%) | 95% CI           | Weight (%) |        |
|------------------------|-------------|----------------|------------------|------------|--------|
|                        |             |                |                  | Fixed      | Random |
| Alkundi, 2020          | 232         | 2.586          | 0.955 to 5.544   | 0.11       | 3.22   |
| Avdeev, 2020           | 1307        | 1.836          | 1.180 to 2.720   | 0.64       | 3.59   |
| Barroso, 2020          | 189         | 5.820          | 2.941 to 10.175  | 0.093      | 3.13   |
| Berenguer, 2020        | 4000        | 7.500          | 6.703 to 8.360   | 1.96       | 3.65   |
| Bermejo-Martin, 2020   | 250         | 4.800          | 2.504 to 8.234   | 0.12       | 3.25   |
| Beurneir, 2020         | 768         | 4.818          | 3.414 to 6.580   | 0.38       | 3.53   |
| Borobia, 2020          | 2226        | 5.211          | 4.325 to 6.217   | 1.09       | 3.63   |
| Burn, 2020             | 18425       | 6.600          | 6.245 to 6.968   | 9.03       | 3.67   |
| Butler, 2020           | 193         | 8.808          | 5.215 to 13.728  | 0.095      | 3.14   |
| Calmes, 2020           | 595         | 9.580          | 7.337 to 12.234  | 0.29       | 3.48   |
| Caminati, 2020         | 1348        | 1.929          | 1.264 to 2.813   | 0.66       | 3.59   |
| Chudasama, 2020        | 1706        | 13.189         | 11.618 to 14.887 | 0.84       | 3.61   |
| Docherty, 2020         | 16749       | 14.001         | 13.479 to 14.536 | 8.21       | 3.67   |
| Garcia-Pachon, 2020    | 376         | 2.660          | 1.283 to 4.837   | 0.18       | 3.38   |
| Giannoglou, 2020       | 512         | 13.867         | 10.992 to 17.167 | 0.25       | 3.45   |
| Goodacre, 2020         | 5768        | 13.298         | 12.431 to 14.201 | 2.83       | 3.66   |
| Grandbastien, 2020     | 114         | 21.930         | 14.723 to 30.648 | 0.056      | 2.85   |
| Gregoriano, 2020       | 99          | 16.162         | 9.529 to 24.915  | 0.049      | 2.75   |
| Lombardi, 2020         | 1043        | 1.918          | 1.175 to 2.946   | 0.51       | 3.57   |
| Meyer, 2020            | 101         | 14.851         | 8.557 to 23.310  | 0.050      | 2.77   |
| Myrstad, 2020          | 66          | 10.606         | 4.372 to 20.639  | 0.033      | 2.45   |
| Ottenhoff, 2020        | 2218        | 10.415         | 9.174 to 11.761  | 1.09       | 3.63   |
| Peixoto, 2020          | 20293       | 1.399          | 1.242 to 1.571   | 9.95       | 3.67   |
| Poblador-Plou, 2020    | 771         | 3.243          | 2.109 to 4.750   | 0.38       | 3.53   |
| Prieto-Alhambra, 2020  | 121262      | 6.810          | 6.669 to 6.953   | 59.44      | 3.68   |
| Regina, 2020           | 200         | 4.000          | 1.742 to 7.729   | 0.099      | 3.15   |
| San-Juan, 2020         | 32          | 12.500         | 3.513 to 28.995  | 0.016      | 1.82   |
| Sapey, 2020            | 2217        | 19.802         | 18.161 to 21.522 | 1.09       | 3.63   |
| Soria, 2020            | 448         | 6.473          | 4.378 to 9.165   | 0.22       | 3.42   |
| Thompson, 2020         | 470         | 10.000         | 7.440 to 13.076  | 0.23       | 3.44   |
| Total (fixed effects)  | 203978      | 6.787          | 6.678 to 6.897   | 100.00     | 100.00 |
| Total (random effects) | 203978      | 7.610          | 5.980 to 9.418   | 100.00     | 100.00 |

## Test for heterogeneity

|                                |                |
|--------------------------------|----------------|
| Q                              | 3793.5701      |
| DF                             | 29             |
| Significance level             | P < 0.0001     |
| I <sup>2</sup> (inconsistency) | 99.24%         |
| 95% CI for I <sup>2</sup>      | 99.14 to 99.32 |

Prevalence 7.61 (5.98 – 9.42). Significant heterogeneity,  $p < 0.0001$ .

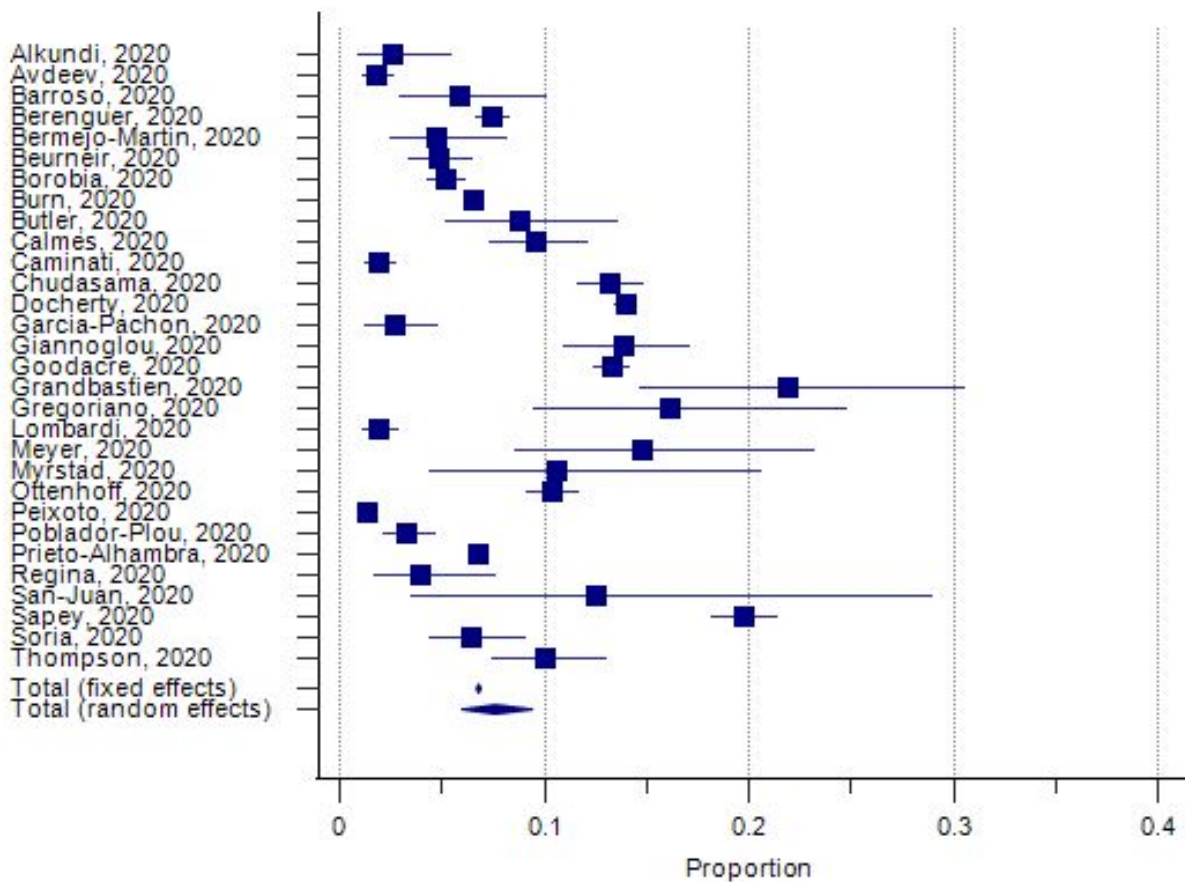

USA Prevalence

| Study                   | Sample size | Proportion (%) | 95% CI           | Weight (%) |        |
|-------------------------|-------------|----------------|------------------|------------|--------|
|                         |             |                |                  | Fixed      | Random |
| Abrams, 2020            | 133         | 4.511          | 1.673 to 9.560   | 0.038      | 1.36   |
| Andrikopoulou, 2020     | 158         | 11.392         | 6.893 to 17.406  | 0.045      | 1.42   |
| Arentz, 2020            | 21          | 9.524          | 1.175 to 30.377  | 0.0063     | 0.61   |
| Argenziano, 2020        | 1000        | 11.300         | 9.404 to 13.427  | 0.28       | 1.73   |
| Arshad, 2020            | 2541        | 9.917          | 8.782 to 11.146  | 0.72       | 1.77   |
| Azar, 2020              | 1052        | 11.312         | 9.461 to 13.382  | 0.30       | 1.73   |
| Bajaj, 2020             | 108         | 8.333          | 3.881 to 15.230  | 0.031      | 1.29   |
| Barasa                  | 117         | 11.966         | 6.699 to 19.261  | 0.034      | 1.32   |
| Bhatraju, 2020          | 24          | 12.500         | 2.656 to 32.361  | 0.0071     | 0.66   |
| Bramante, 2020          | 6256        | 4.204          | 3.720 to 4.731   | 1.78       | 1.79   |
| Broadhurst, 2020        | 436         | 12.156         | 9.240 to 15.597  | 0.12       | 1.64   |
| Bruckner, 2020          | 105         | 9.524          | 4.662 to 16.818  | 0.030      | 1.28   |
| Burn, 2020              | 240392      | 13.500         | 13.364 to 13.637 | 68.33      | 1.80   |
| Burn, 2020              | 3105        | 12.593         | 11.445 to 13.811 | 0.88       | 1.78   |
| Campoli, 2020           | 251         | 18.327         | 13.741 to 23.678 | 0.072      | 1.54   |
| Cates, 2020             | 3948        | 6.890          | 6.119 to 7.725   | 1.12       | 1.78   |
| Chhiba, 2020            | 1526        | 14.417         | 12.691 to 16.280 | 0.43       | 1.75   |
| Clouston, 2020          | 1387        | 6.273          | 5.054 to 7.680   | 0.39       | 1.75   |
| Cummings, 2020          | 257         | 8.171          | 5.129 to 12.219  | 0.073      | 1.54   |
| Dai, 2020               | 863         | 4.751          | 3.431 to 6.390   | 0.25       | 1.72   |
| Dashti, 2020            | 4140        | 12.899         | 11.892 to 13.958 | 1.18       | 1.78   |
| Duanmu, 2020            | 100         | 10.000         | 4.900 to 17.622  | 0.029      | 1.26   |
| Ferguson, 2020          | 72          | 9.722          | 3.999 to 19.011  | 0.021      | 1.13   |
| Fox, 2020               | 355         | 7.606          | 5.072 to 10.873  | 0.10       | 1.61   |
| Garg, 2020              | 159         | 16.981         | 11.499 to 23.737 | 0.045      | 1.42   |
| Garibaldi, 2020         | 832         | 9.495          | 7.590 to 11.693  | 0.24       | 1.71   |
| Gayam, 2020             | 408         | 13.235         | 10.101 to 16.914 | 0.12       | 1.63   |
| Gold, 2020              | 305         | 10.492         | 7.288 to 14.488  | 0.087      | 1.58   |
| Goyal, 2020             | 391         | 12.532         | 9.417 to 16.228  | 0.11       | 1.62   |
| Gupta, 2020             | 2215        | 11.603         | 10.298 to 13.010 | 0.63       | 1.77   |
| Hsu, 2020               | 2729        | 13.192         | 11.944 to 14.519 | 0.78       | 1.77   |
| Hussein, 2020           | 495         | 14.545         | 11.558 to 17.964 | 0.14       | 1.66   |
| Jehi, 2020              | 4536        | 14.396         | 13.386 to 15.451 | 1.29       | 1.78   |
| Keswani, 2020           | 1043        | 25.407         | 22.790 to 28.165 | 0.30       | 1.73   |
| Kim, 2020               | 2484        | 12.601         | 11.320 to 13.970 | 0.71       | 1.77   |
| Ko, 2020                | 5416        | 12.999         | 12.114 to 13.923 | 1.54       | 1.79   |
| Lieberman-Cribbin, 2020 | 6245        | 4.404          | 3.908 to 4.942   | 1.78       | 1.79   |
| Lokken, 2020            | 46          | 8.696          | 2.420 to 20.792  | 0.013      | 0.94   |
| Lovinsky-Desir, 2020    | 1298        | 12.635         | 10.875 to 14.566 | 0.37       | 1.74   |
| Maeda, 2020             | 224         | 10.268         | 6.621 to 15.008  | 0.064      | 1.51   |
| Mahadavinia, 2020       | 935         | 25.775         | 22.998 to 28.706 | 0.27       | 1.72   |
| Marcello, 2020          | 10142       | 7.000          | 6.511 to 7.514   | 2.88       | 1.79   |
| Mendy, 2020             | 689         | 10.160         | 8.006 to 12.661  | 0.20       | 1.69   |

|                        |        |        |                  |        |        |
|------------------------|--------|--------|------------------|--------|--------|
| Meyers, 2020           | 91     | 5.495  | 1.808 to 12.358  | 0.026  | 1.22   |
| Mikami, 2020           | 6493   | 4.205  | 3.729 to 4.721   | 1.85   | 1.79   |
| Monteiro, 2020         | 112    | 11.607 | 6.327 to 19.030  | 0.032  | 1.30   |
| Newton, 2020           | 993    | 13.494 | 11.430 to 15.778 | 0.28   | 1.73   |
| Nguyen, 2020           | 689    | 17.271 | 14.521 to 20.305 | 0.20   | 1.69   |
| O'Keefe, 2020          | 496    | 14.718 | 11.717 to 18.146 | 0.14   | 1.66   |
| Palaiodimos, 2020      | 200    | 13.500 | 9.089 to 19.031  | 0.057  | 1.48   |
| Paranjpe, 2020         | 2199   | 8.186  | 7.073 to 9.411   | 0.63   | 1.77   |
| Price-Haywood, 2020    | 3481   | 4.108  | 3.473 to 4.821   | 0.99   | 1.78   |
| Richardson, 2020       | 5700   | 9.000  | 8.269 to 9.773   | 1.62   | 1.79   |
| Salacup, 2020          | 242    | 7.025  | 4.145 to 11.009  | 0.069  | 1.53   |
| Shah, 2020             | 316    | 12.025 | 8.652 to 16.130  | 0.090  | 1.58   |
| Silver, 2020           | 249    | 19.679 | 14.927 to 25.168 | 0.071  | 1.53   |
| Singer, 2020           | 2388   | 6.281  | 5.341 to 7.330   | 0.68   | 1.77   |
| Suleyman, 2020         | 463    | 15.767 | 12.567 to 19.411 | 0.13   | 1.65   |
| Tartof, 2020           | 6916   | 18.407 | 17.499 to 19.340 | 1.97   | 1.79   |
| Toussie, 2020          | 338    | 13.609 | 10.139 to 17.733 | 0.096  | 1.60   |
| Van Gerwen, 2020       | 3703   | 11.612 | 10.597 to 12.688 | 1.05   | 1.78   |
| Wang, 2020             | 7592   | 4.505  | 4.049 to 4.996   | 2.16   | 1.79   |
| Yan, 2020              | 128    | 10.156 | 5.520 to 16.741  | 0.037  | 1.35   |
| Total (fixed effects)  | 351728 | 12.054 | 11.947 to 12.162 | 100.00 | 100.00 |
| Total (random effects) | 351728 | 11.002 | 9.784 to 12.283  | 100.00 | 100.00 |

11.00 (9.78 – 12.28)

Mexico prevalence

| Study                    | Sample size | Proportion (%) | 95% CI         | Weight (%) |        |
|--------------------------|-------------|----------------|----------------|------------|--------|
|                          |             |                |                | Fixed      | Random |
| Bello-Chavolla, 2020     | 101237      | 2.899          | 2.797 to 3.004 | 24.70      | 29.21  |
| Giannouchos, 2020        | 89756       | 2.900          | 2.791 to 3.012 | 21.90      | 28.63  |
| Hernandez-Galdamez, 2020 | 211002      | 2.800          | 2.730 to 2.871 | 51.49      | 31.86  |
| Ortiz-Brizuela, 2020     | 309         | 2.913          | 1.340 to 5.457 | 0.076      | 0.55   |
| Solis, 2020              | 7496        | 3.601          | 3.191 to 4.048 | 1.83       | 9.75   |
| Total (fixed effects)    | 409800      | 2.861          | 2.810 to 2.912 | 100.00     | 100.00 |
| Total (random effects)   | 409800      | 2.934          | 2.795 to 3.077 | 100.00     | 100.00 |

2.93 (2.80 – 3.08)

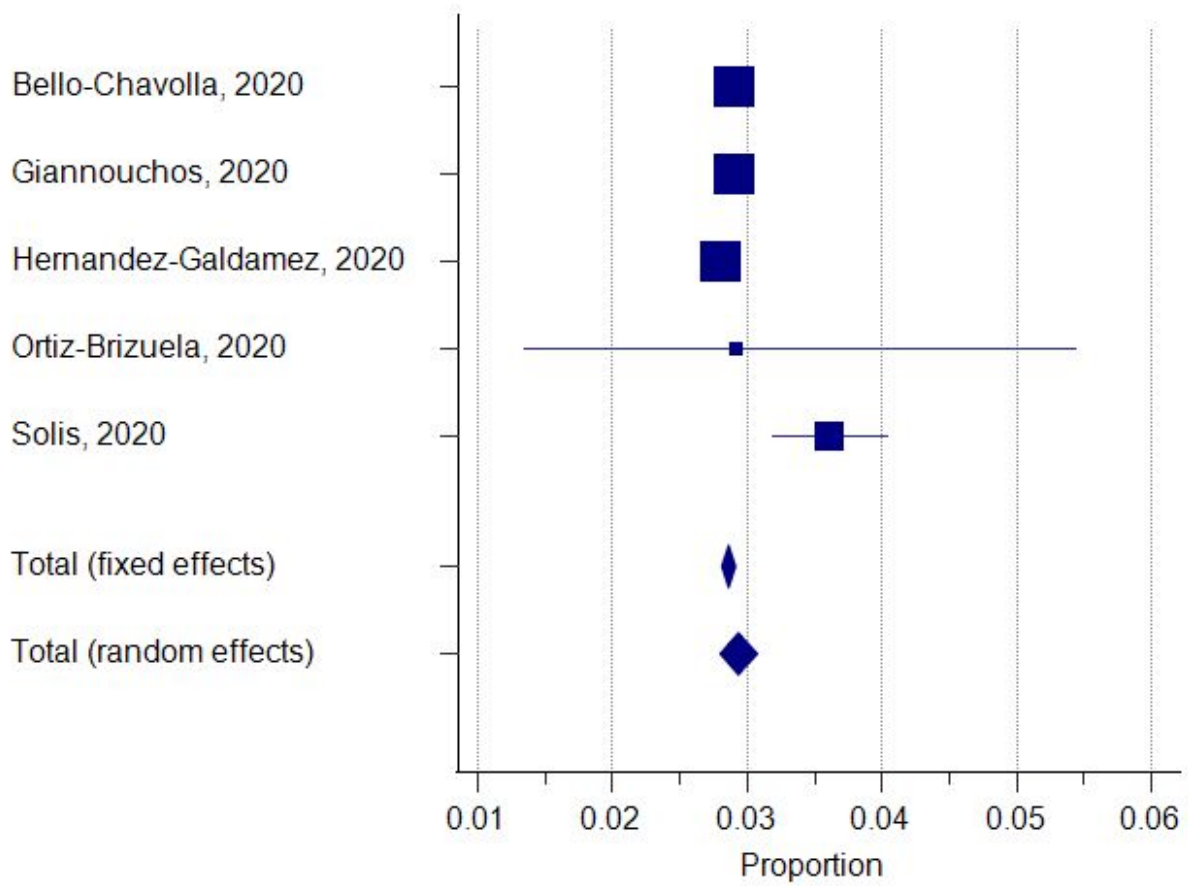

## New York City prevalence

| Study                   | Sample size | Proportion (%) | 95% CI           | Weight (%) |        |
|-------------------------|-------------|----------------|------------------|------------|--------|
|                         |             |                |                  | Fixed      | Random |
| Abrams, 2020            | 133         | 4.511          | 1.673 to 9.560   | 0.27       | 3.68   |
| Andrikopoulou, 2020     | 158         | 11.392         | 6.893 to 17.406  | 0.32       | 3.93   |
| Argenziano, 2020        | 1000        | 11.300         | 9.404 to 13.427  | 1.99       | 5.57   |
| Clouston, 2020          | 1387        | 6.273          | 5.054 to 7.680   | 2.76       | 5.70   |
| Cummings, 2020          | 257         | 8.171          | 5.129 to 12.219  | 0.51       | 4.54   |
| Gayam, 2020             | 408         | 13.235         | 10.101 to 16.914 | 0.81       | 5.00   |
| Goyal, 2020             | 391         | 12.532         | 9.417 to 16.228  | 0.78       | 4.96   |
| Lieberman-Cribbin, 2020 | 6245        | 4.404          | 3.908 to 4.942   | 12.42      | 5.97   |
| Lovinsky-Desir, 2020    | 1298        | 12.635         | 10.875 to 14.566 | 2.58       | 5.68   |
| Maeda, 2020             | 224         | 10.268         | 6.621 to 15.008  | 0.45       | 4.38   |
| Marcello, 2020          | 10142       | 7.000          | 6.511 to 7.514   | 20.18      | 6.00   |
| Mikami, 2020            | 6493        | 4.205          | 3.729 to 4.721   | 12.92      | 5.98   |
| Palaiodimos, 2020       | 200         | 13.500         | 9.089 to 19.031  | 0.40       | 4.24   |
| Paranjpe, 2020          | 2199        | 8.186          | 7.073 to 9.411   | 4.38       | 5.83   |
| Richardson, 2020        | 5700        | 9.000          | 8.269 to 9.773   | 11.34      | 5.97   |
| Singer, 2020            | 2388        | 6.281          | 5.341 to 7.330   | 4.75       | 5.84   |
| Toussie, 2020           | 338         | 13.609         | 10.139 to 17.733 | 0.67       | 4.83   |
| Van Gerwen, 2020        | 3703        | 11.612         | 10.597 to 12.688 | 7.37       | 5.92   |
| Wang, 2020              | 7592        | 4.505          | 4.049 to 4.996   | 15.10      | 5.99   |
| Total (fixed effects)   | 50256       | 6.717          | 6.500 to 6.940   | 100.00     | 100.00 |
| Total (random effects)  | 50256       | 8.693          | 7.287 to 10.211  | 100.00     | 100.00 |

### Test for heterogeneity

|                                |                |
|--------------------------------|----------------|
| Q                              | 530.7536       |
| DF                             | 18             |
| Significance level             | P < 0.0001     |
| I <sup>2</sup> (inconsistency) | 96.61%         |
| 95% CI for I <sup>2</sup>      | 95.65 to 97.36 |

Prevalence 8.69 (7.29 – 10.21). Significant heterogeneity,  $p < 0.0001$ .



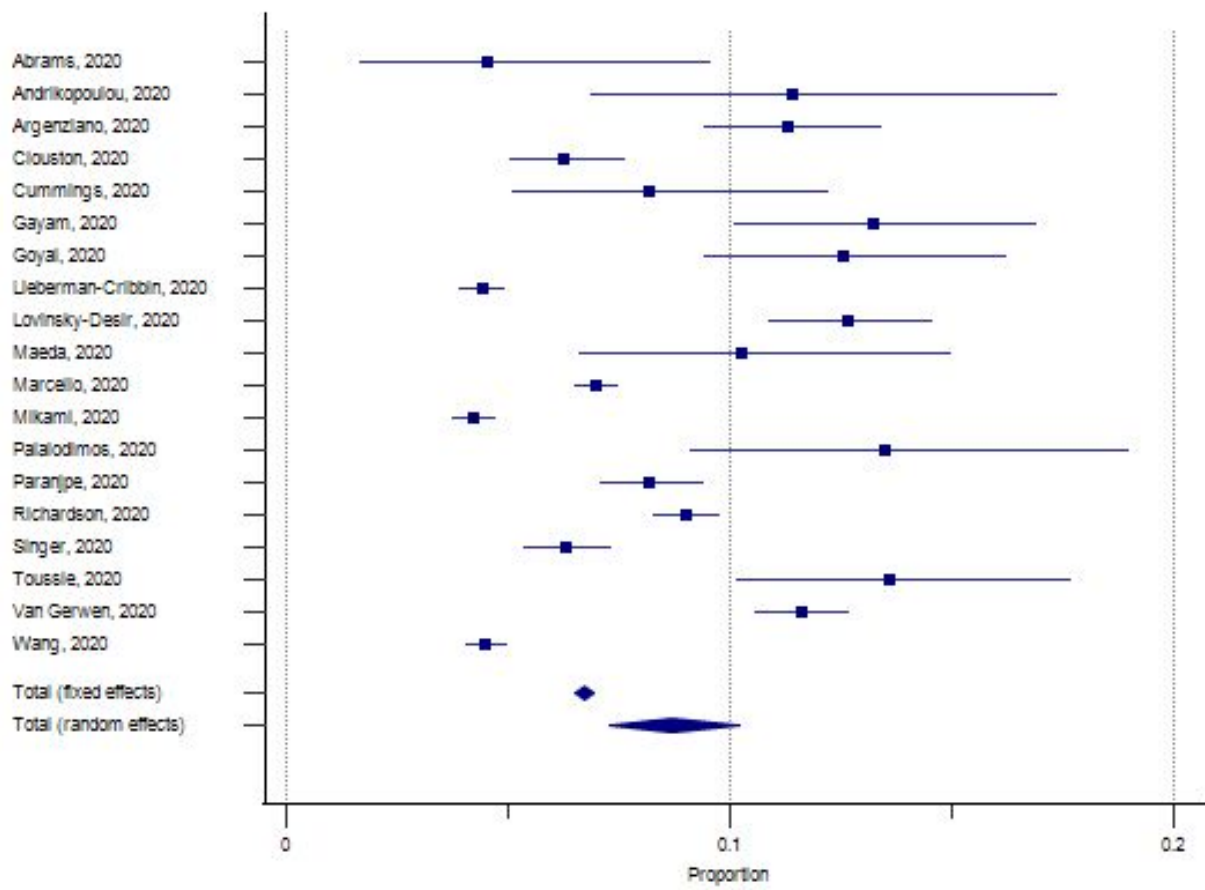

## Mexico prevalence

| Study                    | Sample size | Proportion (%) | 95% CI         | Weight (%) |        |
|--------------------------|-------------|----------------|----------------|------------|--------|
|                          |             |                |                | Fixed      | Random |
| Bello-Chavolla, 2020     | 101237      | 2.899          | 2.797 to 3.004 | 14.37      | 17.67  |
| Dominguez-Ramirez, 2020  | 294744      | 5.600          | 5.517 to 5.684 | 41.83      | 17.69  |
| Giannouchos, 2020        | 89756       | 2.900          | 2.791 to 3.012 | 12.74      | 17.67  |
| Hernandez-Galdamez, 2020 | 211002      | 2.800          | 2.730 to 2.871 | 29.95      | 17.69  |
| Ortiz-Brizuela, 2020     | 309         | 2.913          | 1.340 to 5.457 | 0.044      | 11.92  |
| Solis, 2020              | 7496        | 3.601          | 3.191 to 4.048 | 1.06       | 17.35  |
| Total (fixed effects)    | 704544      | 3.900          | 3.855 to 3.946 | 100.00     | 100.00 |
| Total (random effects)   | 704544      | 3.443          | 2.323 to 4.773 | 100.00     | 100.00 |

## Test for heterogeneity

|                                |                |
|--------------------------------|----------------|
| Q                              | 3278.5893      |
| DF                             | 5              |
| Significance level             | P < 0.0001     |
| I <sup>2</sup> (inconsistency) | 99.85%         |
| 95% CI for I <sup>2</sup>      | 99.82 to 99.87 |

Prevalence 3.44 (2.32 – 4.77). Significant heterogeneity,  $p < 0.0001$

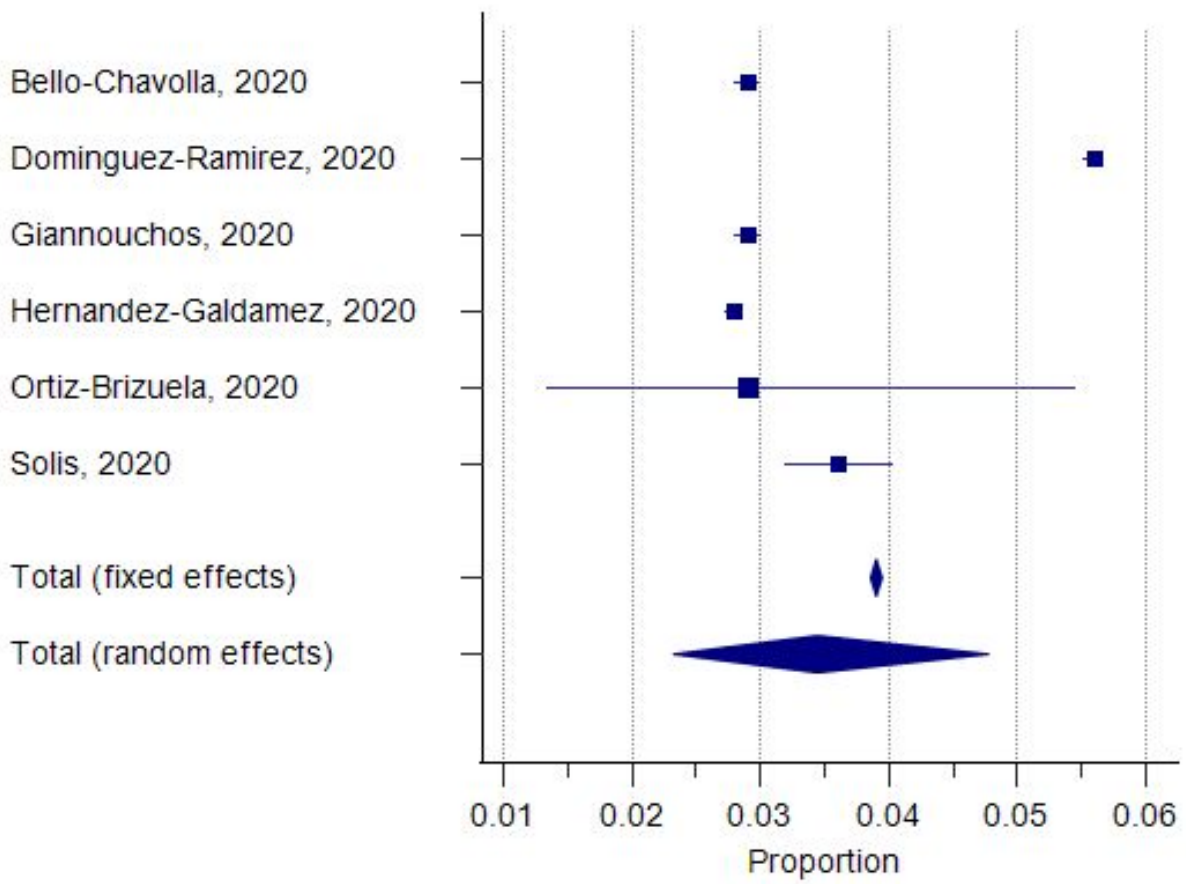

## New York City prevalence

| Study                   | Sample size | Proportion (%) | 95% CI           | Weight (%) |        |
|-------------------------|-------------|----------------|------------------|------------|--------|
|                         |             |                |                  | Fixed      | Random |
| Abrams, 2020            | 133         | 4.511          | 1.673 to 9.560   | 0.27       | 3.68   |
| Andrikopoulou, 2020     | 158         | 11.392         | 6.893 to 17.406  | 0.32       | 3.93   |
| Argenziano, 2020        | 1000        | 11.300         | 9.404 to 13.427  | 1.99       | 5.57   |
| Clouston, 2020          | 1387        | 6.273          | 5.054 to 7.680   | 2.76       | 5.70   |
| Cummings, 2020          | 257         | 8.171          | 5.129 to 12.219  | 0.51       | 4.54   |
| Gayam, 2020             | 408         | 13.235         | 10.101 to 16.914 | 0.81       | 5.00   |
| Goyal, 2020             | 391         | 12.532         | 9.417 to 16.228  | 0.78       | 4.96   |
| Lieberman-Cribbin, 2020 | 6245        | 4.404          | 3.908 to 4.942   | 12.42      | 5.97   |
| Lovinsky-Desir, 2020    | 1298        | 12.635         | 10.875 to 14.566 | 2.58       | 5.68   |
| Maeda, 2020             | 224         | 10.268         | 6.621 to 15.008  | 0.45       | 4.38   |
| Marcello, 2020          | 10142       | 7.000          | 6.511 to 7.514   | 20.18      | 6.00   |
| Mikami, 2020            | 6493        | 4.205          | 3.729 to 4.721   | 12.92      | 5.98   |
| Palaiodimos, 2020       | 200         | 13.500         | 9.089 to 19.031  | 0.40       | 4.24   |
| Paranjpe, 2020          | 2199        | 8.186          | 7.073 to 9.411   | 4.38       | 5.83   |
| Richardson, 2020        | 5700        | 9.000          | 8.269 to 9.773   | 11.34      | 5.97   |
| Singer, 2020            | 2388        | 6.281          | 5.341 to 7.330   | 4.75       | 5.84   |
| Toussie, 2020           | 338         | 13.609         | 10.139 to 17.733 | 0.67       | 4.83   |
| Van Gerwen, 2020        | 3703        | 11.612         | 10.597 to 12.688 | 7.37       | 5.92   |
| Wang, 2020              | 7592        | 4.505          | 4.049 to 4.996   | 15.10      | 5.99   |
| Total (fixed effects)   | 50256       | 6.717          | 6.500 to 6.940   | 100.00     | 100.00 |
| Total (random effects)  | 50256       | 8.693          | 7.287 to 10.211  | 100.00     | 100.00 |

### Test for heterogeneity

|                                |                |
|--------------------------------|----------------|
| Q                              | 530.7536       |
| DF                             | 18             |
| Significance level             | P < 0.0001     |
| I <sup>2</sup> (inconsistency) | 96.61%         |
| 95% CI for I <sup>2</sup>      | 95.65 to 97.36 |

Prevalence 8.69 (7.29 – 10.21). Significant heterogeneity,  $p < 0.0001$ .



Mexico prevalence

| Study                    | Sample size | Proportion (%) | 95% CI         | Weight (%) |        |
|--------------------------|-------------|----------------|----------------|------------|--------|
|                          |             |                |                | Fixed      | Random |
| Bello-Chavolla, 2020     | 101237      | 2.899          | 2.797 to 3.004 | 24.70      | 29.21  |
| Giannouchos, 2020        | 89756       | 2.900          | 2.791 to 3.012 | 21.90      | 28.63  |
| Hernandez-Galdamez, 2020 | 211002      | 2.800          | 2.730 to 2.871 | 51.49      | 31.86  |
| Ortiz-Brizuela, 2020     | 309         | 2.913          | 1.340 to 5.457 | 0.076      | 0.55   |
| Solis, 2020              | 7496        | 3.601          | 3.191 to 4.048 | 1.83       | 9.75   |
| Total (fixed effects)    | 409800      | 2.861          | 2.810 to 2.912 | 100.00     | 100.00 |
| Total (random effects)   | 409800      | 2.934          | 2.795 to 3.077 | 100.00     | 100.00 |

2.93 (2.80 – 3.08)

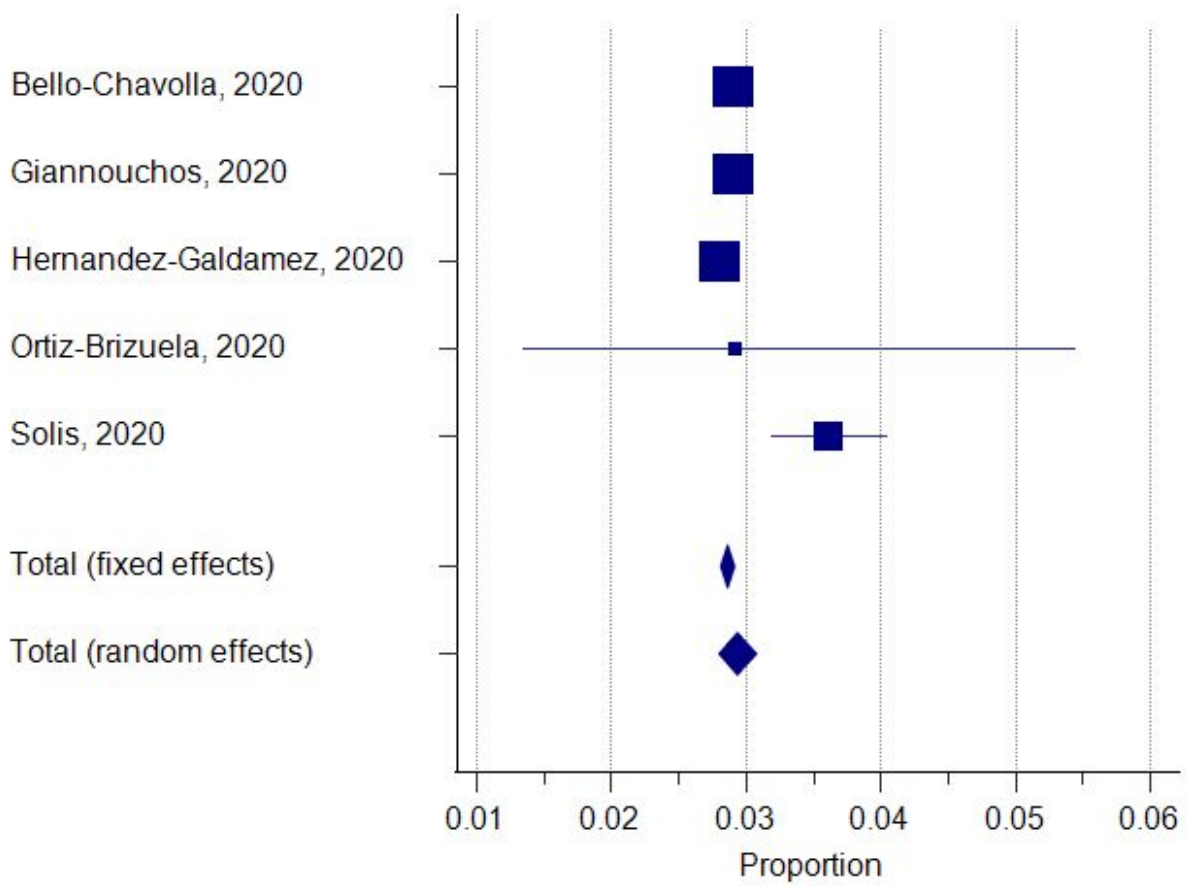

USA Prevalence

| Study                   | Sample size | Proportion (%) | 95% CI           | Weight (%) |        |
|-------------------------|-------------|----------------|------------------|------------|--------|
|                         |             |                |                  | Fixed      | Random |
| Abrams, 2020            | 133         | 4.511          | 1.673 to 9.560   | 0.038      | 1.36   |
| Andrikopoulou, 2020     | 158         | 11.392         | 6.893 to 17.406  | 0.045      | 1.42   |
| Arentz, 2020            | 21          | 9.524          | 1.175 to 30.377  | 0.0063     | 0.61   |
| Argenziano, 2020        | 1000        | 11.300         | 9.404 to 13.427  | 0.28       | 1.73   |
| Arshad, 2020            | 2541        | 9.917          | 8.782 to 11.146  | 0.72       | 1.77   |
| Azar, 2020              | 1052        | 11.312         | 9.461 to 13.382  | 0.30       | 1.73   |
| Bajaj, 2020             | 108         | 8.333          | 3.881 to 15.230  | 0.031      | 1.29   |
| Barasa                  | 117         | 11.966         | 6.699 to 19.261  | 0.034      | 1.32   |
| Bhatraju, 2020          | 24          | 12.500         | 2.656 to 32.361  | 0.0071     | 0.66   |
| Bramante, 2020          | 6256        | 4.204          | 3.720 to 4.731   | 1.78       | 1.79   |
| Broadhurst, 2020        | 436         | 12.156         | 9.240 to 15.597  | 0.12       | 1.64   |
| Bruckner, 2020          | 105         | 9.524          | 4.662 to 16.818  | 0.030      | 1.28   |
| Burn, 2020              | 240392      | 13.500         | 13.364 to 13.637 | 68.33      | 1.80   |
| Burn, 2020              | 3105        | 12.593         | 11.445 to 13.811 | 0.88       | 1.78   |
| Campoli, 2020           | 251         | 18.327         | 13.741 to 23.678 | 0.072      | 1.54   |
| Cates, 2020             | 3948        | 6.890          | 6.119 to 7.725   | 1.12       | 1.78   |
| Chhiba, 2020            | 1526        | 14.417         | 12.691 to 16.280 | 0.43       | 1.75   |
| Clouston, 2020          | 1387        | 6.273          | 5.054 to 7.680   | 0.39       | 1.75   |
| Cummings, 2020          | 257         | 8.171          | 5.129 to 12.219  | 0.073      | 1.54   |
| Dai, 2020               | 863         | 4.751          | 3.431 to 6.390   | 0.25       | 1.72   |
| Dashti, 2020            | 4140        | 12.899         | 11.892 to 13.958 | 1.18       | 1.78   |
| Duanmu, 2020            | 100         | 10.000         | 4.900 to 17.622  | 0.029      | 1.26   |
| Ferguson, 2020          | 72          | 9.722          | 3.999 to 19.011  | 0.021      | 1.13   |
| Fox, 2020               | 355         | 7.606          | 5.072 to 10.873  | 0.10       | 1.61   |
| Garg, 2020              | 159         | 16.981         | 11.499 to 23.737 | 0.045      | 1.42   |
| Garibaldi, 2020         | 832         | 9.495          | 7.590 to 11.693  | 0.24       | 1.71   |
| Gayam, 2020             | 408         | 13.235         | 10.101 to 16.914 | 0.12       | 1.63   |
| Gold, 2020              | 305         | 10.492         | 7.288 to 14.488  | 0.087      | 1.58   |
| Goyal, 2020             | 391         | 12.532         | 9.417 to 16.228  | 0.11       | 1.62   |
| Gupta, 2020             | 2215        | 11.603         | 10.298 to 13.010 | 0.63       | 1.77   |
| Hsu, 2020               | 2729        | 13.192         | 11.944 to 14.519 | 0.78       | 1.77   |
| Hussein, 2020           | 495         | 14.545         | 11.558 to 17.964 | 0.14       | 1.66   |
| Jehi, 2020              | 4536        | 14.396         | 13.386 to 15.451 | 1.29       | 1.78   |
| Keswani, 2020           | 1043        | 25.407         | 22.790 to 28.165 | 0.30       | 1.73   |
| Kim, 2020               | 2484        | 12.601         | 11.320 to 13.970 | 0.71       | 1.77   |
| Ko, 2020                | 5416        | 12.999         | 12.114 to 13.923 | 1.54       | 1.79   |
| Lieberman-Cribbin, 2020 | 6245        | 4.404          | 3.908 to 4.942   | 1.78       | 1.79   |
| Lokken, 2020            | 46          | 8.696          | 2.420 to 20.792  | 0.013      | 0.94   |
| Lovinsky-Desir, 2020    | 1298        | 12.635         | 10.875 to 14.566 | 0.37       | 1.74   |
| Maeda, 2020             | 224         | 10.268         | 6.621 to 15.008  | 0.064      | 1.51   |
| Mahadavinia, 2020       | 935         | 25.775         | 22.998 to 28.706 | 0.27       | 1.72   |
| Marcello, 2020          | 10142       | 7.000          | 6.511 to 7.514   | 2.88       | 1.79   |
| Mendy, 2020             | 689         | 10.160         | 8.006 to 12.661  | 0.20       | 1.69   |

|                        |        |        |                  |        |        |
|------------------------|--------|--------|------------------|--------|--------|
| Meyers, 2020           | 91     | 5.495  | 1.808 to 12.358  | 0.026  | 1.22   |
| Mikami, 2020           | 6493   | 4.205  | 3.729 to 4.721   | 1.85   | 1.79   |
| Monteiro, 2020         | 112    | 11.607 | 6.327 to 19.030  | 0.032  | 1.30   |
| Newton, 2020           | 993    | 13.494 | 11.430 to 15.778 | 0.28   | 1.73   |
| Nguyen, 2020           | 689    | 17.271 | 14.521 to 20.305 | 0.20   | 1.69   |
| O'Keefe, 2020          | 496    | 14.718 | 11.717 to 18.146 | 0.14   | 1.66   |
| Palaiodimos, 2020      | 200    | 13.500 | 9.089 to 19.031  | 0.057  | 1.48   |
| Paranjpe, 2020         | 2199   | 8.186  | 7.073 to 9.411   | 0.63   | 1.77   |
| Price-Haywood, 2020    | 3481   | 4.108  | 3.473 to 4.821   | 0.99   | 1.78   |
| Richardson, 2020       | 5700   | 9.000  | 8.269 to 9.773   | 1.62   | 1.79   |
| Salacup, 2020          | 242    | 7.025  | 4.145 to 11.009  | 0.069  | 1.53   |
| Shah, 2020             | 316    | 12.025 | 8.652 to 16.130  | 0.090  | 1.58   |
| Silver, 2020           | 249    | 19.679 | 14.927 to 25.168 | 0.071  | 1.53   |
| Singer, 2020           | 2388   | 6.281  | 5.341 to 7.330   | 0.68   | 1.77   |
| Suleyman, 2020         | 463    | 15.767 | 12.567 to 19.411 | 0.13   | 1.65   |
| Tartof, 2020           | 6916   | 18.407 | 17.499 to 19.340 | 1.97   | 1.79   |
| Toussie, 2020          | 338    | 13.609 | 10.139 to 17.733 | 0.096  | 1.60   |
| Van Gerwen, 2020       | 3703   | 11.612 | 10.597 to 12.688 | 1.05   | 1.78   |
| Wang, 2020             | 7592   | 4.505  | 4.049 to 4.996   | 2.16   | 1.79   |
| Yan, 2020              | 128    | 10.156 | 5.520 to 16.741  | 0.037  | 1.35   |
| Total (fixed effects)  | 351728 | 12.054 | 11.947 to 12.162 | 100.00 | 100.00 |
| Total (random effects) | 351728 | 11.002 | 9.784 to 12.283  | 100.00 | 100.00 |

11.00 (9.78 – 12.28)



## Severity

| Study                    | Intervention | Controls   | Relative risk | 95% CI           | z | P | Weight (%) |        |
|--------------------------|--------------|------------|---------------|------------------|---|---|------------|--------|
|                          |              |            |               |                  |   |   | Fixed      | Random |
| Aggarwal, 2020           | 2/24         | 0/8        | 1.800         | 0.0952 to 34.024 |   |   | 0.054      | 0.36   |
| Almazeedi, 2020          | 6/42         | 37/1054    | 4.069         | 1.818 to 9.108   |   |   | 0.72       | 2.53   |
| Andrikopoulou, 2020      | 8/34         | 10/124     | 2.918         | 1.249 to 6.818   |   |   | 0.65       | 2.40   |
| Argenziano, 2020         | 29/236       | 59/614     | 1.279         | 0.842 to 1.943   |   |   | 2.68       | 3.93   |
| Azar, 2020               | 20/110       | 23/146     | 1.154         | 0.669 to 1.992   |   |   | 1.58       | 3.44   |
| Bermejo-Martin, 2020     | 2/100        | 6/100      | 0.333         | 0.0689 to 1.612  |   |   | 0.19       | 1.06   |
| Broadhurst, 2020         | 15/139       | 29/212     | 0.789         | 0.439 to 1.417   |   |   | 1.37       | 3.29   |
| Bruckner, 2020           | 3/51         | 7/54       | 0.454         | 0.124 to 1.660   |   |   | 0.28       | 1.42   |
| Caliskan, 2020           | 4/91         | 17/474     | 1.226         | 0.422 to 3.558   |   |   | 0.41       | 1.85   |
| Calmes, 2020             | 10/88        | 47/508     | 1.228         | 0.645 to 2.339   |   |   | 1.13       | 3.07   |
| Dashti, 2020             | 90/619       | 81/575     | 1.032         | 0.782 to 1.363   |   |   | 6.08       | 4.44   |
| Garibaldi, 2020          | 16/171       | 54/523     | 0.906         | 0.533 to 1.540   |   |   | 1.67       | 3.50   |
| Giannouchos, 2020        | 269/11705    | 2341/78049 | 0.766         | 0.676 to 0.868   |   |   | 30.21      | 4.83   |
| Goyal, 2020              | 17/130       | 32/263     | 1.075         | 0.620 to 1.862   |   |   | 1.56       | 3.42   |
| Gregoriano, 2020         | 5/35         | 11/64      | 0.831         | 0.314 to 2.200   |   |   | 0.50       | 2.07   |
| Hernandez-Galdamez, 2020 | 143/5508     | 1379/59987 | 1.129         | 0.953 to 1.339   |   |   | 16.26      | 4.74   |

|                      |        |          |       |                        |  |       |      |
|----------------------|--------|----------|-------|------------------------|--|-------|------|
| Higuchi, 2020        | 0/7    | 8/50     | 0.375 | 0.0239<br>to<br>5.884  |  | 0.062 | 0.41 |
| Hsu, 2020            | 29/188 | 140/900  | 0.992 | 0.687<br>to<br>1.432   |  | 3.47  | 4.12 |
| Lee, 2020            | 63/371 | 621/6901 | 1.887 | 1.489<br>to<br>2.392   |  | 8.35  | 4.56 |
| Li, 2020             | 3/269  | 2/279    | 1.556 | 0.262<br>to<br>9.238   |  | 0.15  | 0.87 |
| Lovinsky-Desir, 2020 | 35/268 | 128/1030 | 1.051 | 0.741<br>to<br>1.490   |  | 3.86  | 4.19 |
| Maeda, 2020          | 4/57   | 19/167   | 0.617 | 0.219<br>to<br>1.737   |  | 0.44  | 1.92 |
| Mendy, 2020          | 23/91  | 47/598   | 3.216 | 2.056<br>to<br>5.030   |  | 2.35  | 3.82 |
| Meyer, 2020          | 3/20   | 12/81    | 1.012 | 0.315<br>to<br>3.251   |  | 0.35  | 1.65 |
| Monteiro, 2020       | 4/28   | 9/84     | 1.333 | 0.445<br>to<br>3.995   |  | 0.39  | 1.79 |
| Morshed, 2020        | 1/16   | 5/87     | 1.087 | 0.136<br>to<br>8.703   |  | 0.11  | 0.67 |
| Myrstad, 2020        | 0/15   | 7/51     | 0.217 | 0.0131<br>to<br>3.589  |  | 0.060 | 0.39 |
| Newton, 2020         | 13/70  | 54/370   | 1.272 | 0.735<br>to<br>2.203   |  | 1.56  | 3.43 |
| Ortiz-Birzuela, 2020 | 0/29   | 2/111    | 0.747 | 0.0368<br>to<br>15.141 |  | 0.052 | 0.35 |
| Ottenhoff, 2020      | 43/516 | 187/1703 | 0.759 | 0.553<br>to<br>1.041   |  | 4.69  | 4.31 |
| Regina, 2020         | 1/37   | 11/263   | 0.646 | 0.0859<br>to<br>4.862  |  | 0.12  | 0.71 |
| Rosenthal, 2020      | 11/68  | 94/659   | 1.134 | 0.640<br>to<br>2.010   |  | 1.43  | 3.34 |
| Shabwarishi, 2000    | 1/16   | 3/134    | 2.792 | 0.308<br>to<br>25.271  |  | 0.097 | 0.61 |

|                        |           |                 |       |                            |                 |           |            |        |
|------------------------|-----------|-----------------|-------|----------------------------|-----------------|-----------|------------|--------|
| Shahriaridad, 2020     | 1/11      | 6/102           | 1.545 | 0.204<br>to<br>11.692      |                 |           | 0.11       | 0.71   |
| Song, 2020             | 1/242     | 21/719          | 0.141 | 0.0191<br>to<br>1.046      |                 |           | 0.12       | 0.72   |
| Soria, 2020            | 21/346    | 8/102           | 0.774 | 0.353<br>to<br>1.695       |                 |           | 0.76       | 2.60   |
| Suleyman, 2020         | 19/141    | 34/214          | 0.848 | 0.504<br>to<br>1.426       |                 |           | 1.74       | 3.54   |
| Toussie, 2020          | 17/136    | 29/202          | 0.871 | 0.498<br>to<br>1.521       |                 |           | 1.51       | 3.39   |
| Uchida, 2020           | 1/8       | 0/27            | 9.333 | 0.416<br>to<br>209.53<br>6 |                 |           | 0.049      | 0.33   |
| Wang, 2020             | 5/50      | 1/73            | 7.300 | 0.879<br>to<br>60.618      |                 |           | 0.10       | 0.65   |
| Wang, 2020             | 22/53     | 46/509          | 4.593 | 3.012<br>to<br>7.005       |                 |           | 2.64       | 3.92   |
| Yang, 2020             | 1/66      | 6/397           | 1.003 | 0.123<br>to<br>8.195       |                 |           | 0.11       | 0.66   |
| Total (fixed effects)  | 961/22202 | 5633/15856<br>8 | 0.997 | 0.931<br>to<br>1.068       | -<br>0.074<br>0 | 0.94<br>1 | 100.0<br>0 | 100.00 |
| Total (random effects) | 961/22202 | 5633/15856<br>8 | 1.182 | 0.984<br>to<br>1.420       | 1.785           | 0.07<br>4 | 100.0<br>0 | 100.00 |

1.18 (0.98 – 1.42),  $p = 0.07$

## Severity prevalence

| Study                    | Sample size | Proportion (%) | 95% CI           | Weight (%) |        |
|--------------------------|-------------|----------------|------------------|------------|--------|
|                          |             |                |                  | Fixed      | Random |
| Aggarwal, 2020           | 24          | 8.333          | 1.026 to 26.997  | 0.11       | 1.73   |
| Almazeedi, 2020          | 42          | 14.286         | 5.428 to 28.539  | 0.19       | 2.15   |
| Andrikopoulou, 2020      | 34          | 23.529         | 10.746 to 41.171 | 0.16       | 2.00   |
| Argenziano, 2020         | 236         | 12.288         | 8.386 to 17.169  | 1.07       | 2.97   |
| Azar, 2020               | 110         | 18.182         | 11.474 to 26.674 | 0.50       | 2.71   |
| Bermejo-Martin, 2020     | 100         | 2.000          | 0.243 to 7.038   | 0.45       | 2.67   |
| Broadhurst, 2020         | 139         | 10.791         | 6.167 to 17.174  | 0.63       | 2.80   |
| Bruckner, 2020           | 51          | 5.882          | 1.230 to 16.242  | 0.23       | 2.28   |
| Caliskan, 2020           | 91          | 4.396          | 1.210 to 10.873  | 0.41       | 2.62   |
| Calmes, 2020             | 88          | 11.364         | 5.586 to 19.907  | 0.40       | 2.60   |
| Dashti, 2020             | 619         | 14.540         | 11.856 to 17.566 | 2.79       | 3.13   |
| Garibaldi, 2020          | 171         | 9.357          | 5.443 to 14.750  | 0.77       | 2.88   |
| Giannouchos, 2020        | 11705       | 2.298          | 2.034 to 2.586   | 52.63      | 3.23   |
| Goyal, 2020              | 130         | 13.077         | 7.806 to 20.110  | 0.59       | 2.78   |
| Gregoriano, 2020         | 35          | 14.286         | 4.806 to 30.257  | 0.16       | 2.02   |
| Hernandez-Galdamez, 2020 | 5508        | 2.596          | 2.192 to 3.051   | 24.77      | 3.23   |
| Higuchi, 2020            | 7           | 0.000          | 0.000 to 40.962  | 0.036      | 0.87   |
| Hsu, 2020                | 188         | 15.426         | 10.581 to 21.397 | 0.85       | 2.90   |
| Lee, 2020                | 371         | 16.981         | 13.302 to 21.196 | 1.67       | 3.06   |
| Li, 2020                 | 269         | 1.115          | 0.231 to 3.224   | 1.21       | 3.00   |
| Lovinsky-Desir, 2020     | 268         | 13.060         | 9.268 to 17.692  | 1.21       | 3.00   |
| Maeda, 2020              | 57          | 7.018          | 1.945 to 17.004  | 0.26       | 2.36   |
| Mendy, 2020              | 91          | 25.275         | 16.746 to 35.473 | 0.41       | 2.62   |
| Meyer, 2020              | 20          | 15.000         | 3.207 to 37.893  | 0.094      | 1.59   |
| Monteiro, 2020           | 28          | 14.286         | 4.034 to 32.665  | 0.13       | 1.85   |
| Morshed, 2020            | 16          | 6.250          | 0.158 to 30.232  | 0.076      | 1.42   |
| Myrstad, 2020            | 15          | 0.000          | 0.000 to 21.802  | 0.072      | 1.37   |
| Newton, 2020             | 70          | 18.571         | 10.276 to 29.661 | 0.32       | 2.48   |
| Ortiz-Birzuela, 2020     | 29          | 0.000          | 0.000 to 11.944  | 0.13       | 1.88   |
| Ottenhoff, 2020          | 516         | 8.333          | 6.096 to 11.061  | 2.32       | 3.11   |
| Regina, 2020             | 37          | 2.703          | 0.0684 to 14.160 | 0.17       | 2.06   |
| Rosenthal, 2020          | 68          | 16.176         | 8.362 to 27.103  | 0.31       | 2.46   |
| Shabwarishi, 2000        | 16          | 6.250          | 0.158 to 30.232  | 0.076      | 1.42   |
| Shahriaridad, 2020       | 11          | 9.091          | 0.230 to 41.278  | 0.054      | 1.15   |
| Song, 2020               | 242         | 0.413          | 0.0105 to 2.281  | 1.09       | 2.97   |
| Soria, 2020              | 346         | 6.069          | 3.796 to 9.128   | 1.56       | 3.05   |
| Suleyman, 2020           | 141         | 13.475         | 8.312 to 20.241  | 0.64       | 2.81   |
| Toussie, 2020            | 136         | 12.500         | 7.453 to 19.258  | 0.62       | 2.80   |
| Uchida, 2020             | 8           | 12.500         | 0.316 to 52.651  | 0.040      | 0.95   |
| Wang, 2020               | 50          | 10.000         | 3.328 to 21.814  | 0.23       | 2.27   |
| Wang, 2020               | 53          | 41.509         | 28.136 to 55.866 | 0.24       | 2.31   |
| Yang, 2020               | 66          | 1.515          | 0.0384 to 8.155  | 0.30       | 2.45   |
| Total (fixed effects)    | 22202       | 3.716          | 3.471 to 3.973   | 100.00     | 100.00 |

|                        |       |       |                 |        |        |
|------------------------|-------|-------|-----------------|--------|--------|
| Total (random effects) | 22202 | 9.918 | 7.774 to 12.292 | 100.00 | 100.00 |
|------------------------|-------|-------|-----------------|--------|--------|

9.92 (7.77 – 12.29)

## Non-severity

| Study                    | Sample size | Proportion (%) | 95% CI           | Weight (%) |        |
|--------------------------|-------------|----------------|------------------|------------|--------|
|                          |             |                |                  | Fixed      | Random |
| Aggarwal, 2020           | 8           | 0.000          | 0.000 to 36.942  | 0.0057     | 0.45   |
| Almazeedi, 2020          | 1054        | 3.510          | 2.483 to 4.806   | 0.67       | 2.95   |
| Andrikopoulou, 2020      | 124         | 8.065          | 3.935 to 14.331  | 0.079      | 2.18   |
| Argenziano, 2020         | 614         | 9.609          | 7.395 to 12.220  | 0.39       | 2.85   |
| Azar, 2020               | 146         | 15.753         | 10.256 to 22.694 | 0.093      | 2.28   |
| Bermejo-Martin, 2020     | 100         | 6.000          | 2.233 to 12.603  | 0.064      | 2.04   |
| Broadhurst, 2020         | 212         | 13.679         | 9.356 to 19.051  | 0.13       | 2.48   |
| Bruckner, 2020           | 54          | 12.963         | 5.374 to 24.901  | 0.035      | 1.58   |
| Caliskan, 2020           | 474         | 3.586          | 2.103 to 5.680   | 0.30       | 2.79   |
| Calmes, 2020             | 508         | 9.252          | 6.877 to 12.113  | 0.32       | 2.81   |
| Dashti, 2020             | 575         | 14.087         | 11.347 to 17.202 | 0.36       | 2.84   |
| Garibaldi, 2020          | 523         | 10.325         | 7.852 to 13.257  | 0.33       | 2.82   |
| Giannouchos, 2020        | 78049       | 2.999          | 2.881 to 3.121   | 49.21      | 3.10   |
| Goyal, 2020              | 263         | 12.167         | 8.473 to 16.741  | 0.17       | 2.58   |
| Gregoriano, 2020         | 64          | 17.187         | 8.905 to 28.675  | 0.041      | 1.71   |
| Hernandez-Galdamez, 2020 | 59987       | 2.299          | 2.180 to 2.422   | 37.82      | 3.10   |
| Higuchi, 2020            | 50          | 16.000         | 7.170 to 29.113  | 0.032      | 1.52   |
| Hsu, 2020                | 900         | 15.556         | 13.248 to 18.091 | 0.57       | 2.93   |
| Lee, 2020                | 6901        | 8.999          | 8.334 to 9.699   | 4.35       | 3.08   |
| Li, 2020                 | 279         | 0.717          | 0.0869 to 2.565  | 0.18       | 2.61   |
| Lovinsky-Desir, 2020     | 1030        | 12.427         | 10.474 to 14.598 | 0.65       | 2.95   |
| Maeda, 2020              | 167         | 11.377         | 6.991 to 17.196  | 0.11       | 2.36   |
| Mendy, 2020              | 598         | 7.860          | 5.832 to 10.315  | 0.38       | 2.85   |
| Meyer, 2020              | 81          | 14.815         | 7.896 to 24.449  | 0.052      | 1.89   |
| Monteiro, 2020           | 84          | 10.714         | 5.018 to 19.367  | 0.054      | 1.91   |
| Morshed, 2020            | 87          | 5.747          | 1.892 to 12.904  | 0.055      | 1.94   |
| Myrstad, 2020            | 51          | 13.725         | 5.701 to 26.255  | 0.033      | 1.54   |
| Newton, 2020             | 370         | 14.595         | 11.158 to 18.610 | 0.23       | 2.71   |
| Ortiz-Birzuela, 2020     | 111         | 1.802          | 0.219 to 6.357   | 0.071      | 2.11   |
| Ottenhoff, 2020          | 1703        | 10.981         | 9.535 to 12.563  | 1.07       | 3.01   |
| Regina, 2020             | 263         | 4.183          | 2.106 to 7.360   | 0.17       | 2.58   |
| Rosenthal, 2020          | 659         | 14.264         | 11.683 to 17.170 | 0.42       | 2.87   |
| Shabwarishi, 2000        | 134         | 2.239          | 0.464 to 6.403   | 0.085      | 2.23   |
| Shahriaridad, 2020       | 102         | 5.882          | 2.189 to 12.365  | 0.065      | 2.05   |
| Song, 2020               | 719         | 2.921          | 1.817 to 4.430   | 0.45       | 2.89   |
| Soria, 2020              | 102         | 7.843          | 3.447 to 14.870  | 0.065      | 2.05   |
| Suleyman, 2020           | 214         | 15.888         | 11.261 to 21.488 | 0.14       | 2.49   |
| Toussie, 2020            | 202         | 14.356         | 9.830 to 19.963  | 0.13       | 2.46   |
| Uchida, 2020             | 27          | 0.000          | 0.000 to 12.770  | 0.018      | 1.07   |
| Wang, 2020               | 73          | 1.370          | 0.0347 to 7.398  | 0.047      | 1.81   |
| Wang, 2020               | 509         | 9.037          | 6.692 to 11.870  | 0.32       | 2.81   |
| Yang, 2020               | 397         | 1.511          | 0.557 to 3.260   | 0.25       | 2.74   |
| Total (fixed effects)    | 158568      | 3.300          | 3.212 to 3.389   | 100.00     | 100.00 |

|                        |        |       |                |        |        |
|------------------------|--------|-------|----------------|--------|--------|
| Total (random effects) | 158568 | 8.226 | 6.968 to 9.578 | 100.00 | 100.00 |
|------------------------|--------|-------|----------------|--------|--------|

8.23 (6.97 – 9.58)

## Survival

| Study              | Intervention | Controls | Relative risk | 95% CI                 | z | P | Weight (%) |        |
|--------------------|--------------|----------|---------------|------------------------|---|---|------------|--------|
|                    |              |          |               |                        |   |   | Fixed      | Random |
| Alizadehsani, 2020 | 0/15         | 2/108    | 1.362         | 0.0685<br>to<br>27.114 |   |   | 0.032      | 0.20   |
| Alkundi, 2020      | 0/24         | 2/63     | 0.512         | 0.0255<br>to<br>10.294 |   |   | 0.032      | 0.20   |
| Almazeedi, 2020    | 4/19         | 39/1077  | 5.814         | 2.308<br>to<br>14.642  |   |   | 0.34       | 1.52   |
| Azar, 2020         | 10/51        | 10/59    | 1.157         | 0.524<br>to<br>2.555   |   |   | 0.46       | 1.86   |
| Baqui, 2020        | 100/3328     | 182/4043 | 0.667         | 0.525<br>to<br>0.848   |   |   | 4.98       | 4.23   |
| Berenguer, 2020    | 69/1116      | 231/2884 | 0.772         | 0.595<br>to<br>1.001   |   |   | 4.24       | 4.14   |
| Bisso, 2020        | 1/46         | 8/122    | 0.332         | 0.0426<br>to<br>2.578  |   |   | 0.068      | 0.41   |
| Borobia, 2020      | 17/460       | 97/1766  | 0.673         | 0.406<br>to<br>1.115   |   |   | 1.12       | 2.93   |
| Caliskan, 2020     | 4/75         | 17/490   | 1.537         | 0.532<br>to<br>4.445   |   |   | 0.25       | 1.25   |
| Calmes, 2020       | 4/87         | 53/509   | 0.442         | 0.164<br>to<br>1.189   |   |   | 0.29       | 1.38   |
| Choi, 2020         | 21/277       | 199/7363 | 2.805         | 1.818<br>to<br>4.327   |   |   | 1.52       | 3.27   |
| Choi, 2020         | 8/126        | 118/3931 | 2.115         | 1.057<br>to<br>4.233   |   |   | 0.59       | 2.17   |
| Clouston, 2020     | 13/211       | 73/1176  | 0.993         | 0.560<br>to<br>1.758   |   |   | 0.88       | 2.64   |
| Dashti, 2020       | 25/187       | 510/3953 | 1.036         | 0.713<br>to<br>1.506   |   |   | 2.05       | 3.57   |
| Garibaldi, 2020    | 8/131        | 70/694   | 0.605         | 0.298<br>to<br>1.228   |   |   | 0.57       | 2.12   |



|                          |           |             |       |                       |  |  |       |      |
|--------------------------|-----------|-------------|-------|-----------------------|--|--|-------|------|
| Gayam, 2020              | 16/132    | 38/276      | 0.880 | 0.510<br>to<br>1.520  |  |  | 0.96  | 2.75 |
| Giannoglou, 2020         | 10/81     | 61/431      | 0.872 | 0.467<br>to<br>1.630  |  |  | 0.73  | 2.42 |
| Gupta, 2020              | 70/784    | 187/1431    | 0.683 | 0.527<br>to<br>0.887  |  |  | 4.22  | 4.13 |
| Haw, 2020                | 22/768    | 146/2988    | 0.586 | 0.377<br>to<br>0.911  |  |  | 1.47  | 3.23 |
| Hernandez-Galdamez, 2020 | 544/25928 | 5366/185075 | 0.724 | 0.663<br>to<br>0.789  |  |  | 37.59 | 4.76 |
| Hsu, 2020                | 15/98     | 169/1088    | 0.985 | 0.606<br>to<br>1.602  |  |  | 1.21  | 3.02 |
| Hussein, 2020            | 7/64      | 65/431      | 0.725 | 0.348<br>to<br>1.511  |  |  | 0.53  | 2.03 |
| Lee, 2020                | 44/227    | 641/7045    | 2.130 | 1.618<br>to<br>2.806  |  |  | 3.77  | 4.06 |
| Lombardi, 2020           | 2/233     | 18/810      | 0.386 | 0.0903<br>to<br>1.653 |  |  | 0.14  | 0.75 |
| Lovinsky-Desir, 2020     | 9/110     | 154/1188    | 0.631 | 0.332<br>to<br>1.201  |  |  | 0.69  | 2.35 |
| Marcello, 2020           | 103/1717  | 323/4363    | 0.810 | 0.654<br>to<br>1.004  |  |  | 6.21  | 4.34 |
| Meyer, 2020              | 3/30      | 12/71       | 0.592 | 0.180<br>to<br>1.947  |  |  | 0.20  | 1.04 |
| Mikami, 2020             | 76/1694   | 97/2014     | 0.932 | 0.695<br>to<br>1.249  |  |  | 3.33  | 3.97 |
| Nguyen, 2020             | 2/34      | 44/266      | 0.356 | 0.0902<br>to<br>1.401 |  |  | 0.15  | 0.83 |
| Paranjpe, 2020           | 23/310    | 157/1889    | 0.893 | 0.586<br>to<br>1.360  |  |  | 1.62  | 3.34 |
| Peixoto, 2020            | 3/502     | 277/19768   | 0.426 | 0.137<br>to<br>1.326  |  |  | 0.22  | 1.13 |
| Robinson, 2020           | 7/45      | 73/358      | 0.763 | 0.375<br>to<br>1.553  |  |  | 0.57  | 2.11 |

|                              |                |                  |        |                         |                |            |            |        |
|------------------------------|----------------|------------------|--------|-------------------------|----------------|------------|------------|--------|
| Rosenthal, 2020              | 10/61          | 95/666           | 1.149  | 0.633<br>to<br>2.087    |                |            | 0.80       | 2.53   |
| Saha, 2020                   | 3/95           | 12/73            | 0.192  | 0.0563<br>to<br>0.656   |                |            | 0.19       | 1.00   |
| Salacup, 2020                | 0/52           | 19/190           | 0.0924 | 0.0056<br>7 to<br>1.505 |                |            | 0.037      | 0.23   |
| Sapey, 2020                  | 143/769        | 295/1448         | 0.913  | 0.763<br>to<br>1.092    |                |            | 8.87       | 4.48   |
| Sardinha, 2020               | 10/470         | 13/737           | 1.206  | 0.533<br>to<br>2.728    |                |            | 0.43       | 1.79   |
| Satici, 2020                 | 1/55           | 42/626           | 0.271  | 0.0380<br>to<br>1.931   |                |            | 0.074      | 0.44   |
| Shahriarida<br>d, 2020       | 1/9            | 6/104            | 1.926  | 0.259<br>to<br>14.295   |                |            | 0.071      | 0.43   |
| Tartof, 2020                 | 44/206         | 1228/6710        | 1.167  | 0.894<br>to<br>1.524    |                |            | 4.02       | 4.10   |
| Thompson, 2020               | 11/169         | 36/301           | 0.544  | 0.285<br>to<br>1.041    |                |            | 0.68       | 2.33   |
| Trabulus, 2020               | 1/43           | 19/293           | 0.359  | 0.0493<br>to<br>2.611   |                |            | 0.073      | 0.44   |
| Van<br>Gerwen,<br>2020       | 61/616         | 171/1399         | 0.810  | 0.614<br>to<br>1.068    |                |            | 3.74       | 4.06   |
| Total (fixed<br>effects)     | 1525/4145<br>5 | 11375/27027<br>7 | 0.796  | 0.755<br>to<br>0.840    | -<br>8.31<br>5 | <0.00<br>1 | 100.0<br>0 | 100.00 |
| Total<br>(random<br>effects) | 1525/4145<br>5 | 11375/27027<br>7 | 0.888  | 0.774<br>to<br>1.019    | -<br>1.68<br>8 | 0.091      | 100.0<br>0 | 100.00 |

0.89 (0.77 – 1.02), p = 0.09

TIF attached

## Died

| Study                    | Sample size | Proportion (%) | 95% CI           | Weight (%) |        |
|--------------------------|-------------|----------------|------------------|------------|--------|
|                          |             |                |                  | Fixed      | Random |
| Alizadehsani, 2020       | 15          | 0.000          | 0.000 to 21.802  | 0.039      | 1.05   |
| Alkundi, 2020            | 24          | 0.000          | 0.000 to 14.247  | 0.060      | 1.37   |
| Almazeedi, 2020          | 19          | 21.053         | 6.052 to 45.565  | 0.048      | 1.21   |
| Azar, 2020               | 51          | 19.608         | 9.824 to 33.116  | 0.13       | 1.91   |
| Baqui, 2020              | 3328        | 3.005          | 2.451 to 3.643   | 8.02       | 2.99   |
| Berenguer, 2020          | 1116        | 6.183          | 4.842 to 7.760   | 2.69       | 2.93   |
| Bisso, 2020              | 46          | 2.174          | 0.0550 to 11.527 | 0.11       | 1.84   |
| Borobia, 2020            | 460         | 3.696          | 2.167 to 5.851   | 1.11       | 2.83   |
| Caliskan, 2020           | 75          | 5.333          | 1.472 to 13.096  | 0.18       | 2.16   |
| Calmes, 2020             | 87          | 4.598          | 1.267 to 11.355  | 0.21       | 2.25   |
| Choi, 2020               | 277         | 7.581          | 4.754 to 11.355  | 0.67       | 2.72   |
| Choi, 2020               | 126         | 6.349          | 2.781 to 12.127  | 0.31       | 2.44   |
| Clouston, 2020           | 211         | 6.161          | 3.321 to 10.305  | 0.51       | 2.64   |
| Dashti, 2020             | 187         | 13.369         | 8.842 to 19.100  | 0.45       | 2.60   |
| Garibaldi, 2020          | 131         | 6.107          | 2.673 to 11.678  | 0.32       | 2.46   |
| Gayam, 2020              | 132         | 12.121         | 7.090 to 18.937  | 0.32       | 2.46   |
| Giannoglou, 2020         | 81          | 12.346         | 6.082 to 21.534  | 0.20       | 2.21   |
| Gupta, 2020              | 784         | 8.929          | 7.026 to 11.146  | 1.89       | 2.90   |
| Haw, 2020                | 768         | 2.865          | 1.804 to 4.305   | 1.85       | 2.90   |
| Hernandez-Galdamez, 2020 | 25928       | 2.098          | 1.927 to 2.280   | 62.48      | 3.01   |
| Hsu, 2020                | 98          | 15.306         | 8.827 to 23.986  | 0.24       | 2.31   |
| Hussein, 2020            | 64          | 10.938         | 4.512 to 21.246  | 0.16       | 2.06   |
| Lee, 2020                | 227         | 19.383         | 14.451 to 25.134 | 0.55       | 2.66   |
| Lombardi, 2020           | 233         | 0.858          | 0.104 to 3.066   | 0.56       | 2.67   |
| Lovinsky-Desir, 2020     | 110         | 8.182          | 3.810 to 14.964  | 0.27       | 2.37   |
| Marcello, 2020           | 1717        | 5.999          | 4.923 to 7.228   | 4.14       | 2.96   |
| Meyer, 2020              | 30          | 10.000         | 2.112 to 26.529  | 0.075      | 1.53   |
| Mikami, 2020             | 1694        | 4.486          | 3.551 to 5.583   | 4.08       | 2.96   |
| Nguyen, 2020             | 34          | 5.882          | 0.720 to 19.677  | 0.084      | 1.62   |
| Paranjpe, 2020           | 310         | 7.419          | 4.761 to 10.925  | 0.75       | 2.75   |
| Peixoto, 2020            | 502         | 0.598          | 0.123 to 1.736   | 1.21       | 2.84   |
| Robinson, 2020           | 45          | 15.556         | 6.491 to 29.455  | 0.11       | 1.82   |
| Rosenthal, 2020          | 61          | 16.393         | 8.152 to 28.089  | 0.15       | 2.03   |
| Saha, 2020               | 95          | 3.158          | 0.656 to 8.952   | 0.23       | 2.30   |
| Salacup, 2020            | 52          | 0.000          | 0.000 to 6.848   | 0.13       | 1.92   |
| Sapey, 2020              | 769         | 18.596         | 15.905 to 21.529 | 1.86       | 2.90   |
| Sardinha, 2020           | 470         | 2.128          | 1.025 to 3.878   | 1.13       | 2.83   |
| Satici, 2020             | 55          | 1.818          | 0.0460 to 9.719  | 0.13       | 1.96   |
| Shahriaridad, 2020       | 9           | 11.111         | 0.281 to 48.250  | 0.024      | 0.75   |
| Tartof, 2020             | 206         | 21.359         | 15.969 to 27.593 | 0.50       | 2.63   |
| Thompson, 2020           | 169         | 6.509          | 3.294 to 11.348  | 0.41       | 2.56   |
| Trabulus, 2020           | 43          | 2.326          | 0.0589 to 12.289 | 0.11       | 1.79   |
| Van Gerwen, 2020         | 616         | 9.903          | 7.660 to 12.538  | 1.49       | 2.87   |

|                        |       |       |                |        |        |
|------------------------|-------|-------|----------------|--------|--------|
| Total (fixed effects)  | 41455 | 3.262 | 3.093 to 3.437 | 100.00 | 100.00 |
| Total (random effects) | 41455 | 7.136 | 5.621 to 8.818 | 100.00 | 100.00 |

7.14 (5.62 – 8.82)

TIF attached

## Survived

| Study                    | Sample size | Proportion (%) | 95% CI           | Weight (%) |        |
|--------------------------|-------------|----------------|------------------|------------|--------|
|                          |             |                |                  | Fixed      | Random |
| Alizadehsani, 2020       | 108         | 1.852          | 0.225 to 6.530   | 0.040      | 2.01   |
| Alkundi, 2020            | 63          | 3.175          | 0.387 to 11.002  | 0.024      | 1.77   |
| Almazeedi, 2020          | 1077        | 3.621          | 2.587 to 4.917   | 0.40       | 2.43   |
| Azar, 2020               | 59          | 16.949         | 8.439 to 28.969  | 0.022      | 1.74   |
| Baqui, 2020              | 4043        | 4.502          | 3.883 to 5.187   | 1.50       | 2.47   |
| Berenguer, 2020          | 2884        | 8.010          | 7.045 to 9.061   | 1.07       | 2.47   |
| Bisso, 2020              | 122         | 6.557          | 2.873 to 12.512  | 0.046      | 2.05   |
| Borobia, 2020            | 1766        | 5.493          | 4.476 to 6.660   | 0.65       | 2.45   |
| Caliskan, 2020           | 490         | 3.469          | 2.034 to 5.497   | 0.18       | 2.36   |
| Calmes, 2020             | 509         | 10.413         | 7.897 to 13.398  | 0.19       | 2.37   |
| Choi, 2020               | 7363        | 2.703          | 2.344 to 3.099   | 2.72       | 2.48   |
| Choi, 2020               | 3931        | 3.002          | 2.491 to 3.584   | 1.45       | 2.47   |
| Clouston, 2020           | 1176        | 6.207          | 4.897 to 7.742   | 0.44       | 2.44   |
| Dashti, 2020             | 3953        | 12.902         | 11.872 to 13.987 | 1.46       | 2.47   |
| Garibaldi, 2020          | 694         | 10.086         | 7.947 to 12.572  | 0.26       | 2.40   |
| Gayam, 2020              | 276         | 13.768         | 9.931 to 18.405  | 0.10       | 2.28   |
| Giannoglou, 2020         | 431         | 14.153         | 11.002 to 17.806 | 0.16       | 2.35   |
| Gupta, 2020              | 1431        | 13.068         | 11.364 to 14.925 | 0.53       | 2.45   |
| Haw, 2020                | 2988        | 4.886          | 4.141 to 5.721   | 1.11       | 2.47   |
| Hernandez-Galdamez, 2020 | 185075      | 2.900          | 2.824 to 2.977   | 68.47      | 2.49   |
| Hsu, 2020                | 1088        | 15.533         | 13.430 to 17.824 | 0.40       | 2.43   |
| Hussein, 2020            | 431         | 15.081         | 11.836 to 18.814 | 0.16       | 2.35   |
| Lee, 2020                | 7045        | 9.099          | 8.437 to 9.794   | 2.61       | 2.48   |
| Lombardi, 2020           | 810         | 2.222          | 1.322 to 3.489   | 0.30       | 2.41   |
| Lovinsky-Desir, 2020     | 1188        | 12.963         | 11.104 to 15.007 | 0.44       | 2.44   |
| Marcello, 2020           | 4363        | 7.403          | 6.644 to 8.220   | 1.61       | 2.48   |
| Meyer, 2020              | 71          | 16.901         | 9.050 to 27.663  | 0.027      | 1.83   |
| Mikami, 2020             | 2014        | 4.816          | 3.923 to 5.844   | 0.75       | 2.46   |
| Nguyen, 2020             | 266         | 16.541         | 12.284 to 21.563 | 0.099      | 2.27   |
| Paranjpe, 2020           | 1889        | 8.311          | 7.105 to 9.648   | 0.70       | 2.46   |
| Peixoto, 2020            | 19768       | 1.401          | 1.242 to 1.575   | 7.31       | 2.49   |
| Robinson, 2020           | 358         | 20.391         | 16.338 to 24.942 | 0.13       | 2.32   |
| Rosenthal, 2020          | 666         | 14.264         | 11.696 to 17.153 | 0.25       | 2.40   |
| Saha, 2020               | 73          | 16.438         | 8.793 to 26.954  | 0.027      | 1.84   |
| Salacup, 2020            | 190         | 10.000         | 6.129 to 15.175  | 0.071      | 2.19   |
| Sapey, 2020              | 1448        | 20.373         | 18.326 to 22.541 | 0.54       | 2.45   |
| Sardinha, 2020           | 737         | 1.764          | 0.942 to 2.997   | 0.27       | 2.41   |
| Satici, 2020             | 626         | 6.709          | 4.878 to 8.961   | 0.23       | 2.39   |
| Shahriaridad, 2020       | 104         | 5.769          | 2.146 to 12.135  | 0.039      | 1.99   |
| Tartof, 2020             | 6710        | 18.301         | 17.382 to 19.247 | 2.48       | 2.48   |
| Thompson, 2020           | 301         | 11.960         | 8.519 to 16.172  | 0.11       | 2.29   |
| Trabulus, 2020           | 293         | 6.485          | 3.949 to 9.942   | 0.11       | 2.29   |
| Van Gerwen, 2020         | 1399        | 12.223         | 10.552 to 14.055 | 0.52       | 2.44   |

|                        |        |       |                 |        |        |
|------------------------|--------|-------|-----------------|--------|--------|
| Total (fixed effects)  | 270277 | 3.776 | 3.705 to 3.849  | 100.00 | 100.00 |
| Total (random effects) | 270277 | 8.566 | 6.949 to 10.334 | 100.00 | 100.00 |

8.57 (6.95 – 10.33)

## Hospitalization

| Study                    | Intervention | Controls    | Relative risk | 95% CI         | z | P | Weight (%) |        |
|--------------------------|--------------|-------------|---------------|----------------|---|---|------------|--------|
|                          |              |             |               |                |   |   | Fixed      | Random |
| Argenziano, 2020         | 88/850       | 25/150      | 0.621         | 0.413 to 0.935 |   |   | 0.70       | 3.74   |
| Azar, 2020               | 40/356       | 76/796      | 1.177         | 0.819 to 1.690 |   |   | 0.90       | 4.12   |
| Bermejo-Martin, 2020     | 8/200        | 4/50        | 0.500         | 0.157 to 1.594 |   |   | 0.088      | 0.94   |
| Campoli, 2020            | 12/62        | 34/189      | 1.076         | 0.595 to 1.945 |   |   | 0.34       | 2.56   |
| Chhiba, 2020             | 115/853      | 133/853     | 0.865         | 0.686 to 1.089 |   |   | 2.21       | 5.25   |
| Dashti, 2020             | 171/1194     | 337/2759    | 1.173         | 0.988 to 1.391 |   |   | 4.02       | 5.74   |
| Duanmu, 2020             | 3/24         | 7/76        | 1.357         | 0.380 to 4.844 |   |   | 0.073      | 0.80   |
| Garcia-Pachon, 2020      | 4/158        | 6/218       | 0.920         | 0.264 to 3.206 |   |   | 0.076      | 0.83   |
| Giannouchos, 2020        | 750/31270    | 1872/58484  | 0.749         | 0.689 to 0.815 |   |   | 16.85      | 6.28   |
| Green, 2020              | 17/190       | 137/2076    | 1.356         | 0.838 to 2.195 |   |   | 0.51       | 3.22   |
| Hernandez-Galdamez, 2020 | 1506/65495   | 4365/145507 | 0.767         | 0.723 to 0.812 |   |   | 35.19      | 6.38   |
| Hsu, 2020                | 184/1186     | 176/1543    | 1.360         | 1.122 to 1.649 |   |   | 3.18       | 5.58   |
| Israel, 2020             | 814/13120    | 1831/30010  | 1.017         | 0.939 to 1.101 |   |   | 18.40      | 6.30   |
| Jehi, 2020               | 189/958      | 462/3578    | 1.528         | 1.311 to 1.781 |   |   | 5.00       | 5.87   |
| Lee, 2020                | 640/6811     | 44/461      | 0.985         | 0.736 to 1.316 |   |   | 1.39       | 4.73   |
| Mendy, 2020              | 36/216       | 34/473      | 2.319         | 1.493 to 3.601 |   |   | 0.61       | 3.51   |

|                        |                 |                  |       |                        |                |            |            |        |
|------------------------|-----------------|------------------|-------|------------------------|----------------|------------|------------|--------|
| Mikami, 2020           | 174/3708        | 98/2785          | 1.334 | 1.046<br>to<br>1.700   |                |            | 2.00       | 5.15   |
| Newton, 2020           | 67/440          | 67/553           | 1.257 | 0.918<br>to<br>1.722   |                |            | 1.19       | 4.52   |
| Nguyen, 2020           | 46/302          | 59/306           | 0.790 | 0.556<br>to<br>1.122   |                |            | 0.95       | 4.21   |
| O'Keefe, 2020          | 6/35            | 67/461           | 1.180 | 0.551<br>to<br>2.525   |                |            | 0.20       | 1.84   |
| Ortiz-Brizuela, 2020   | 2/140           | 7/169            | 0.345 | 0.072<br>8 to<br>1.634 |                |            | 0.049      | 0.56   |
| Rosenthal, 2020        | 39/274          | 66/453           | 0.977 | 0.677<br>to<br>1.409   |                |            | 0.88       | 4.08   |
| Singer, 2020           | 52/737          | 47/914           | 1.372 | 0.936<br>to<br>2.011   |                |            | 0.81       | 3.95   |
| Suleyman, 2020         | 53/355          | 19/108           | 0.849 | 0.526<br>to<br>1.368   |                |            | 0.52       | 3.24   |
| Van Gerwen, 2020       | 242/2015        | 198/1688         | 1.024 | 0.858<br>to<br>1.221   |                |            | 3.79       | 5.70   |
| Yan, 2020              | 3/26            | 10/102           | 1.177 | 0.349<br>to<br>3.972   |                |            | 0.080      | 0.87   |
| Total (fixed effects)  | 5261/13097<br>5 | 10181/2547<br>62 | 0.897 | 0.867<br>to<br>0.928   | -<br>6.23<br>5 | <0.00<br>1 | 100.0<br>0 | 100.00 |
| Total (random effects) | 5261/13097<br>5 | 10181/2547<br>62 | 1.057 | 0.936<br>to<br>1.194   | 0.89<br>0      | 0.374      | 100.0<br>0 | 100.00 |

1.06 (0.94 – 1.19),  $p = 0.37$



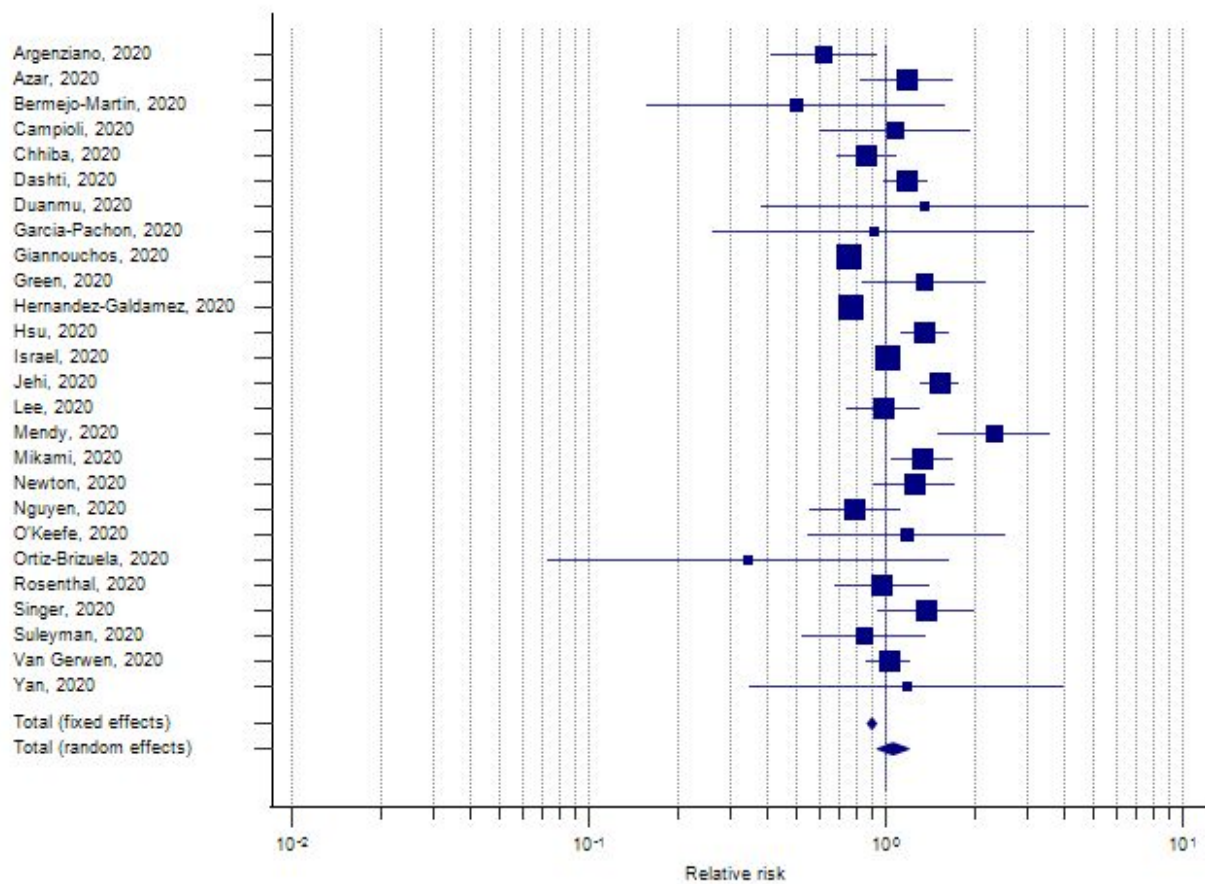

## Hospitalized prevalence

| Study                    | Sample size | Proportion (%) | 95% CI           | Weight (%) |        |
|--------------------------|-------------|----------------|------------------|------------|--------|
|                          |             |                |                  | Fixed      | Random |
| Argenziano, 2020         | 850         | 10.353         | 8.386 to 12.599  | 0.65       | 4.27   |
| Azar, 2020               | 356         | 11.236         | 8.150 to 14.985  | 0.27       | 4.05   |
| Bermejo-Martin, 2020     | 200         | 4.000          | 1.742 to 7.729   | 0.15       | 3.80   |
| Campioli, 2020           | 62          | 19.355         | 10.421 to 31.369 | 0.048      | 2.88   |
| Chhiba, 2020             | 853         | 13.482         | 11.261 to 15.959 | 0.65       | 4.27   |
| Dashti, 2020             | 1194        | 14.322         | 12.383 to 16.438 | 0.91       | 4.32   |
| Duanmu, 2020             | 24          | 12.500         | 2.656 to 32.361  | 0.019      | 1.87   |
| Garcia-Pachon, 2020      | 158         | 2.532          | 0.694 to 6.355   | 0.12       | 3.65   |
| Giannouchos, 2020        | 31270       | 2.398          | 2.232 to 2.574   | 23.87      | 4.44   |
| Green, 2020              | 190         | 8.947          | 5.299 to 13.939  | 0.15       | 3.77   |
| Hernandez-Galdamez, 2020 | 65495       | 2.299          | 2.186 to 2.417   | 50.00      | 4.44   |
| Hsu, 2020                | 1186        | 15.514         | 13.499 to 17.702 | 0.91       | 4.32   |
| Israel, 2020             | 13120       | 6.204          | 5.797 to 6.630   | 10.02      | 4.43   |
| Jehi, 2020               | 958         | 19.729         | 17.253 to 22.392 | 0.73       | 4.29   |
| Lee, 2020                | 6811        | 9.397          | 8.714 to 10.114  | 5.20       | 4.42   |
| Mendy, 2020              | 216         | 16.667         | 11.954 to 22.319 | 0.17       | 3.84   |
| Mikami, 2020             | 3708        | 4.693          | 4.034 to 5.423   | 2.83       | 4.40   |
| Newton, 2020             | 440         | 15.227         | 12.000 to 18.931 | 0.34       | 4.12   |
| Nguyen, 2020             | 302         | 15.232         | 11.372 to 19.789 | 0.23       | 3.99   |
| O'Keefe, 2020            | 35          | 17.143         | 6.562 to 33.650  | 0.027      | 2.27   |
| Ortiz-Brizuela, 2020     | 140         | 1.429          | 0.173 to 5.065   | 0.11       | 3.57   |
| Rosenthal, 2020          | 274         | 14.234         | 10.321 to 18.940 | 0.21       | 3.95   |
| Singer, 2020             | 737         | 7.056          | 5.314 to 9.150   | 0.56       | 4.25   |
| Suleyman, 2020           | 355         | 14.930         | 11.388 to 19.069 | 0.27       | 4.05   |
| Van Gerwen, 2020         | 2015        | 12.010         | 10.622 to 13.510 | 1.54       | 4.37   |
| Yan, 2020                | 26          | 11.538         | 2.446 to 30.154  | 0.021      | 1.96   |
| Total (fixed effects)    | 130975      | 3.583          | 3.483 to 3.685   | 100.00     | 100.00 |
| Total (random effects)   | 130975      | 9.988          | 7.975 to 12.200  | 100.00     | 100.00 |

9.99 (7.98 – 12.2)

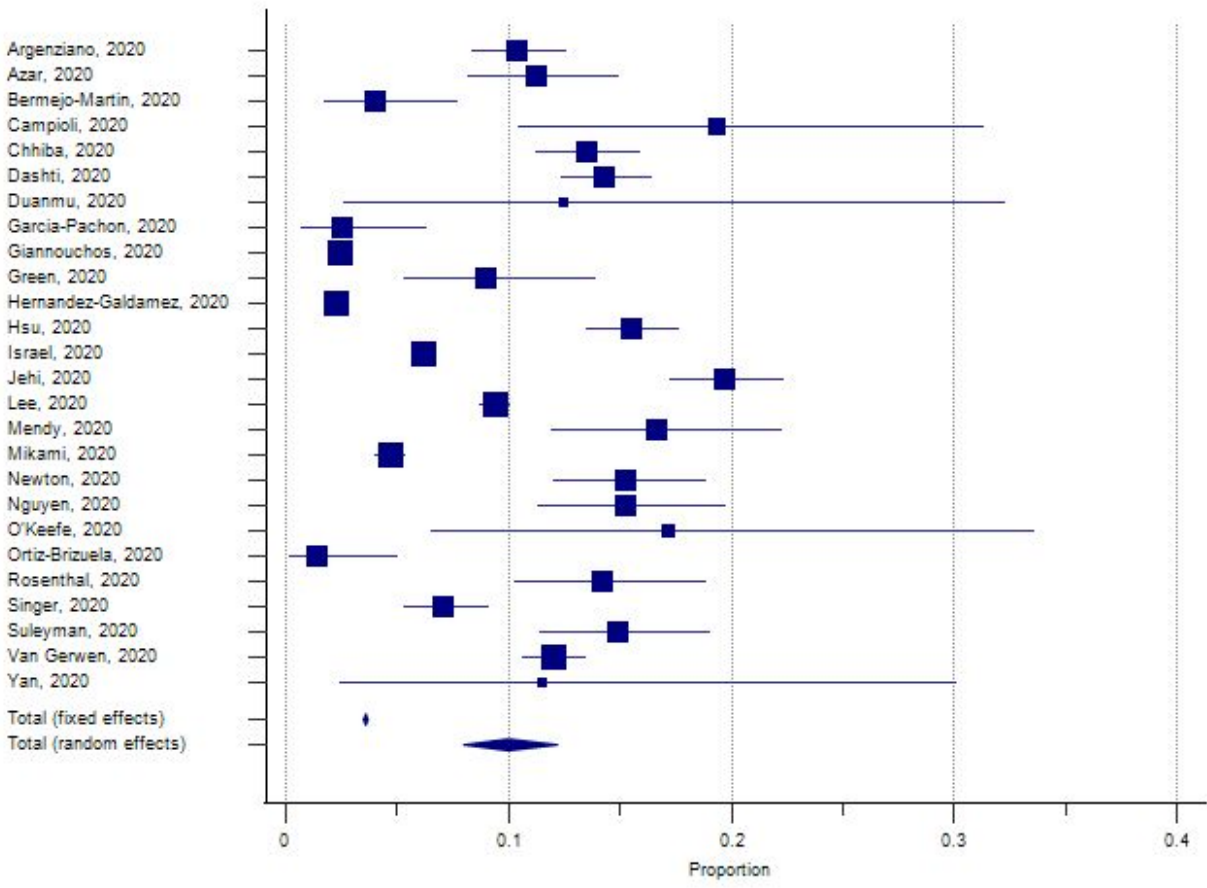

## Non-hospitalized prevalence

| Study                    | Sample size | Proportion (%) | 95% CI           | Weight (%) |        |
|--------------------------|-------------|----------------|------------------|------------|--------|
|                          |             |                |                  | Fixed      | Random |
| Argenziano, 2020         | 150         | 16.667         | 11.086 to 23.612 | 0.059      | 3.17   |
| Azar, 2020               | 796         | 9.548          | 7.596 to 11.805  | 0.31       | 4.21   |
| Bermejo-Martin, 2020     | 50          | 8.000          | 2.223 to 19.234  | 0.020      | 1.98   |
| Campioli, 2020           | 189         | 17.989         | 12.792 to 24.221 | 0.075      | 3.38   |
| Chhiba, 2020             | 853         | 15.592         | 13.221 to 18.203 | 0.34       | 4.23   |
| Dashti, 2020             | 2759        | 12.215         | 11.015 to 13.495 | 1.08       | 4.45   |
| Duanmu, 2020             | 76          | 9.211          | 3.784 to 18.061  | 0.030      | 2.45   |
| Garcia-Pachon, 2020      | 218         | 2.752          | 1.017 to 5.894   | 0.086      | 3.50   |
| Giannouchos, 2020        | 58484       | 3.201          | 3.060 to 3.347   | 22.95      | 4.55   |
| Green, 2020              | 2076        | 6.599          | 5.569 to 7.754   | 0.82       | 4.41   |
| Hernandez-Galdamez, 2020 | 145507      | 3.000          | 2.913 to 3.089   | 57.11      | 4.55   |
| Hsu, 2020                | 1543        | 11.406         | 9.862 to 13.099  | 0.61       | 4.37   |
| Israel, 2020             | 30010       | 6.101          | 5.833 to 6.378   | 11.78      | 4.55   |
| Jehi, 2020               | 3578        | 12.912         | 11.830 to 14.055 | 1.40       | 4.47   |
| Lee, 2020                | 461         | 9.544          | 7.021 to 12.601  | 0.18       | 3.98   |
| Mendy, 2020              | 473         | 7.188          | 5.029 to 9.900   | 0.19       | 4.00   |
| Mikami, 2020             | 2785        | 3.519          | 2.866 to 4.272   | 1.09       | 4.45   |
| Newton, 2020             | 553         | 12.116         | 9.514 to 15.130  | 0.22       | 4.07   |
| Nguyen, 2020             | 306         | 19.281         | 15.014 to 24.154 | 0.12       | 3.75   |
| O'Keefe, 2020            | 461         | 14.534         | 11.444 to 18.086 | 0.18       | 3.98   |
| Ortiz-Brizuela, 2020     | 169         | 4.142          | 1.681 to 8.348   | 0.067      | 3.28   |
| Rosenthal, 2020          | 453         | 14.570         | 11.451 to 18.160 | 0.18       | 3.98   |
| Singer, 2020             | 914         | 5.142          | 3.802 to 6.780   | 0.36       | 4.25   |
| Suleyman, 2020           | 108         | 17.593         | 10.937 to 26.102 | 0.043      | 2.84   |
| Van Gerwen, 2020         | 1688        | 11.730         | 10.233 to 13.361 | 0.66       | 4.38   |
| Yan, 2020                | 102         | 9.804          | 4.802 to 17.291  | 0.040      | 2.77   |
| Total (fixed effects)    | 254762      | 3.796          | 3.722 to 3.871   | 100.00     | 100.00 |
| Total (random effects)   | 254762      | 9.485          | 8.032 to 11.045  | 100.00     | 100.00 |

9.49 (8.03 – 11.05)

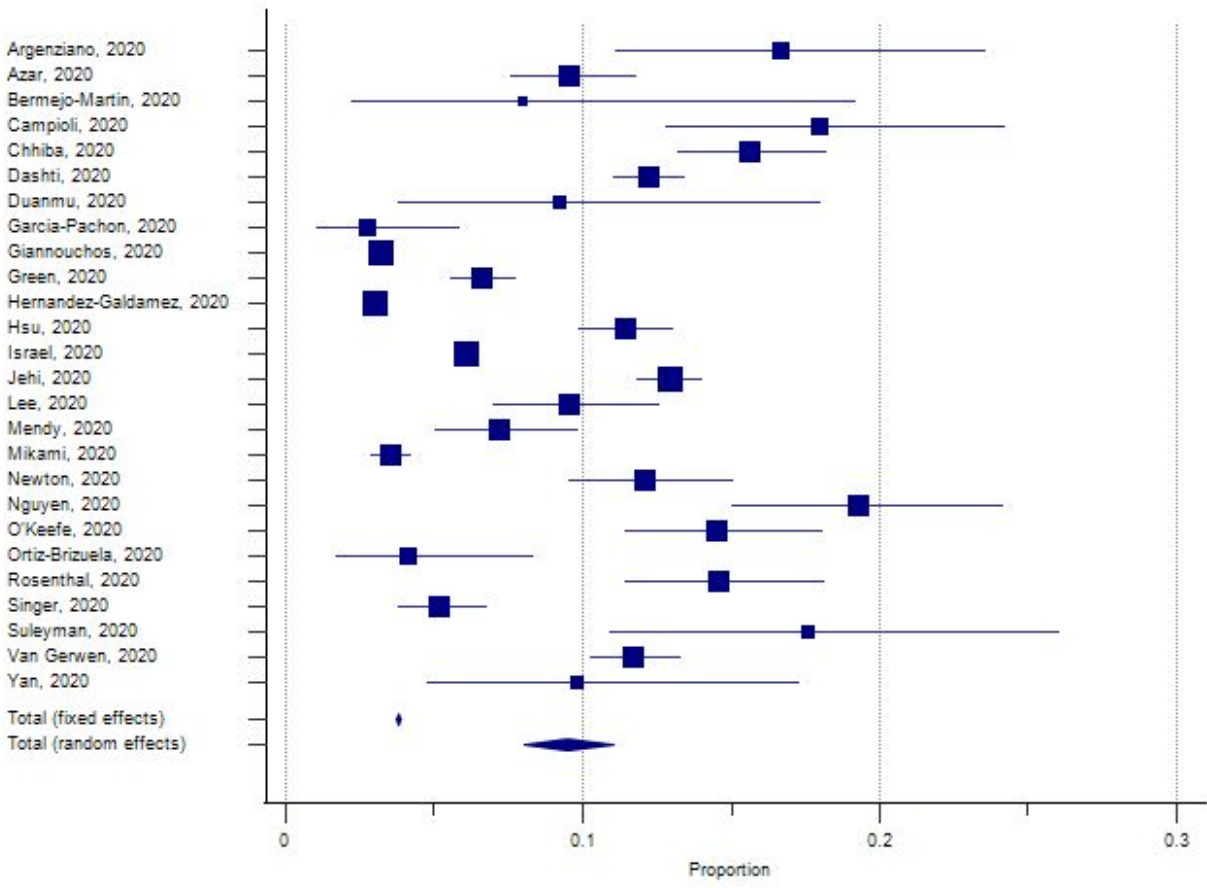

## Survival

| Study                   | Intervention | Controls     | Relative risk | 95% CI           | z | P | Weight (%) |        |
|-------------------------|--------------|--------------|---------------|------------------|---|---|------------|--------|
|                         |              |              |               |                  |   |   | Fixed      | Random |
| Alizadehsani, 2020      | 0/15         | 2/108        | 1.362         | 0.0685 to 27.114 |   |   | 0.016      | 0.31   |
| Alkundi, 2020           | 0/24         | 2/63         | 0.512         | 0.0255 to 10.294 |   |   | 0.016      | 0.31   |
| Almazeedi, 2020         | 4/19         | 39/1077      | 5.814         | 2.308 to 14.642  |   |   | 0.17       | 1.82   |
| Azar, 2020              | 10/51        | 10/59        | 1.157         | 0.524 to 2.555   |   |   | 0.23       | 2.10   |
| Baqui, 2020             | 100/3328     | 182/4043     | 0.667         | 0.525 to 0.848   |   |   | 2.52       | 3.47   |
| Berenguer, 2020         | 69/1116      | 231/2884     | 0.772         | 0.595 to 1.001   |   |   | 2.14       | 3.43   |
| Bisso, 2020             | 1/46         | 8/122        | 0.332         | 0.0426 to 2.578  |   |   | 0.034      | 0.61   |
| Borobia, 2020           | 17/460       | 97/1766      | 0.673         | 0.406 to 1.115   |   |   | 0.57       | 2.83   |
| Caliskan, 2020          | 4/75         | 17/490       | 1.537         | 0.532 to 4.445   |   |   | 0.13       | 1.56   |
| Calmes, 2020            | 4/87         | 53/509       | 0.442         | 0.164 to 1.189   |   |   | 0.15       | 1.69   |
| Choi, 2020              | 21/277       | 199/7363     | 2.805         | 1.818 to 4.327   |   |   | 0.77       | 3.02   |
| Choi, 2020              | 8/126        | 118/3931     | 2.115         | 1.057 to 4.233   |   |   | 0.30       | 2.34   |
| Clouston, 2020          | 13/211       | 73/1176      | 0.993         | 0.560 to 1.758   |   |   | 0.44       | 2.66   |
| Dashti, 2020            | 25/187       | 510/3953     | 1.036         | 0.713 to 1.506   |   |   | 1.04       | 3.18   |
| Dominguez-Ramirez, 2020 | 1388/51408   | 15086/243335 | 0.435         | 0.413 to 0.460   |   |   | 49.38      | 3.70   |

|                          |           |             |       |                       |  |  |       |      |
|--------------------------|-----------|-------------|-------|-----------------------|--|--|-------|------|
| Garibaldi, 2020          | 8/131     | 70/694      | 0.605 | 0.298<br>to<br>1.228  |  |  | 0.29  | 2.31 |
| Gayam, 2020              | 16/132    | 38/276      | 0.880 | 0.510<br>to<br>1.520  |  |  | 0.49  | 2.72 |
| Giannoglou, 2020         | 10/81     | 61/431      | 0.872 | 0.467<br>to<br>1.630  |  |  | 0.37  | 2.52 |
| Gupta, 2020              | 70/784    | 187/1431    | 0.683 | 0.527<br>to<br>0.887  |  |  | 2.13  | 3.43 |
| Haw, 2020                | 22/768    | 146/2988    | 0.586 | 0.377<br>to<br>0.911  |  |  | 0.74  | 3.00 |
| Hernandez-Galdamez, 2020 | 544/25928 | 5366/185075 | 0.724 | 0.663<br>to<br>0.789  |  |  | 19.03 | 3.68 |
| Hsu, 2020                | 15/98     | 169/1088    | 0.985 | 0.606<br>to<br>1.602  |  |  | 0.61  | 2.89 |
| Hussein, 2020            | 7/64      | 65/431      | 0.725 | 0.348<br>to<br>1.511  |  |  | 0.27  | 2.24 |
| Lee, 2020                | 44/227    | 641/7045    | 2.130 | 1.618<br>to<br>2.806  |  |  | 1.91  | 3.40 |
| Lombardi, 2020           | 2/233     | 18/810      | 0.386 | 0.0903<br>to<br>1.653 |  |  | 0.069 | 1.04 |
| Lovinsky-Desir, 2020     | 9/110     | 154/1188    | 0.631 | 0.332<br>to<br>1.201  |  |  | 0.35  | 2.47 |
| Marcello, 2020           | 103/1717  | 323/4363    | 0.810 | 0.654<br>to<br>1.004  |  |  | 3.14  | 3.52 |
| Meyer, 2020              | 3/30      | 12/71       | 0.592 | 0.180<br>to<br>1.947  |  |  | 0.10  | 1.36 |
| Mikami, 2020             | 76/1694   | 97/2014     | 0.932 | 0.695<br>to<br>1.249  |  |  | 1.68  | 3.36 |
| Nguyen, 2020             | 2/34      | 44/266      | 0.356 | 0.0902<br>to<br>1.401 |  |  | 0.077 | 1.13 |
| Paranjpe, 2020           | 23/310    | 157/1889    | 0.893 | 0.586<br>to<br>1.360  |  |  | 0.82  | 3.06 |

|                        |            |                  |        |                         |                 |            |            |        |
|------------------------|------------|------------------|--------|-------------------------|-----------------|------------|------------|--------|
| Peixoto, 2020          | 3/502      | 277/19768        | 0.426  | 0.137<br>to<br>1.326    |                 |            | 0.11       | 1.45   |
| Robinson, 2020         | 7/45       | 73/358           | 0.763  | 0.375<br>to<br>1.553    |                 |            | 0.29       | 2.30   |
| Rosenthal, 2020        | 10/61      | 95/666           | 1.149  | 0.633<br>to<br>2.087    |                 |            | 0.41       | 2.59   |
| Saha, 2020             | 3/95       | 12/73            | 0.192  | 0.0563<br>to<br>0.656   |                 |            | 0.096      | 1.31   |
| Salacup, 2020          | 0/52       | 19/190           | 0.0924 | 0.0056<br>7 to<br>1.505 |                 |            | 0.019      | 0.35   |
| Sapey, 2020            | 143/769    | 295/1448         | 0.913  | 0.763<br>to<br>1.092    |                 |            | 4.49       | 3.58   |
| Sardinha, 2020         | 10/470     | 13/737           | 1.206  | 0.533<br>to<br>2.728    |                 |            | 0.22       | 2.05   |
| Satici, 2020           | 1/55       | 42/626           | 0.271  | 0.0380<br>to<br>1.931   |                 |            | 0.038      | 0.65   |
| Shahriaridad , 2020    | 1/9        | 6/104            | 1.926  | 0.259<br>to<br>14.295   |                 |            | 0.036      | 0.63   |
| Tartof, 2020           | 44/206     | 1228/6710        | 1.167  | 0.894<br>to<br>1.524    |                 |            | 2.03       | 3.42   |
| Thompson, 2020         | 11/169     | 36/301           | 0.544  | 0.285<br>to<br>1.041    |                 |            | 0.34       | 2.46   |
| Trabulus, 2020         | 1/43       | 19/293           | 0.359  | 0.0493<br>to<br>2.611   |                 |            | 0.037      | 0.64   |
| Van Gerwen, 2020       | 61/616     | 171/1399         | 0.810  | 0.614<br>to<br>1.068    |                 |            | 1.89       | 3.40   |
| Total (fixed effects)  | 2913/92863 | 26461/51361<br>2 | 0.566  | 0.545<br>to<br>0.588    | -<br>29.29<br>6 | <0.00<br>1 | 100.0<br>0 | 100.00 |
| Total (random effects) | 2913/92863 | 26461/51361<br>2 | 0.851  | 0.714<br>to<br>1.013    | -1.819          | 0.069      | 100.0<br>0 | 100.00 |

PR = 0.85, 95% CI 0.71 – 1.01, p = 0.07



## Survival Pooled Prevalence

| Study                    | Sample size | Proportion (%) | 95% CI           | Weight (%) |        |
|--------------------------|-------------|----------------|------------------|------------|--------|
|                          |             |                |                  | Fixed      | Random |
| Alizadehsani, 2020       | 108         | 1.852          | 0.225 to 6.530   | 0.021      | 1.77   |
| Alkundi, 2020            | 63          | 3.175          | 0.387 to 11.002  | 0.012      | 1.46   |
| Almazeedi, 2020          | 1077        | 3.621          | 2.587 to 4.917   | 0.21       | 2.43   |
| Azar, 2020               | 59          | 16.949         | 8.439 to 28.969  | 0.012      | 1.42   |
| Baqui, 2020              | 4043        | 4.502          | 3.883 to 5.187   | 0.79       | 2.50   |
| Berenguer, 2020          | 2884        | 8.010          | 7.045 to 9.061   | 0.56       | 2.49   |
| Bisso, 2020              | 122         | 6.557          | 2.873 to 12.512  | 0.024      | 1.83   |
| Borobia, 2020            | 1766        | 5.493          | 4.476 to 6.660   | 0.34       | 2.47   |
| Caliskan, 2020           | 490         | 3.469          | 2.034 to 5.497   | 0.096      | 2.31   |
| Calmes, 2020             | 509         | 10.413         | 7.897 to 13.398  | 0.099      | 2.32   |
| Choi, 2020               | 7363        | 2.703          | 2.344 to 3.099   | 1.43       | 2.52   |
| Choi, 2020               | 3931        | 3.002          | 2.491 to 3.584   | 0.77       | 2.50   |
| Clouston, 2020           | 1176        | 6.207          | 4.897 to 7.742   | 0.23       | 2.44   |
| Dashti, 2020             | 3953        | 12.902         | 11.872 to 13.987 | 0.77       | 2.50   |
| Dominguez-Ramirez, 2020  | 243335      | 6.200          | 6.105 to 6.297   | 47.37      | 2.53   |
| Garibaldi, 2020          | 694         | 10.086         | 7.947 to 12.572  | 0.14       | 2.37   |
| Gayam, 2020              | 276         | 13.768         | 9.931 to 18.405  | 0.054      | 2.17   |
| Giannoglou, 2020         | 431         | 14.153         | 11.002 to 17.806 | 0.084      | 2.28   |
| Gupta, 2020              | 1431        | 13.068         | 11.364 to 14.925 | 0.28       | 2.45   |
| Haw, 2020                | 2988        | 4.886          | 4.141 to 5.721   | 0.58       | 2.49   |
| Hernandez-Galdamez, 2020 | 185075      | 2.900          | 2.824 to 2.977   | 36.03      | 2.53   |
| Hsu, 2020                | 1088        | 15.533         | 13.430 to 17.824 | 0.21       | 2.43   |
| Hussein, 2020            | 431         | 15.081         | 11.836 to 18.814 | 0.084      | 2.28   |
| Lee, 2020                | 7045        | 9.099          | 8.437 to 9.794   | 1.37       | 2.52   |
| Lombardi, 2020           | 810         | 2.222          | 1.322 to 3.489   | 0.16       | 2.39   |
| Lovinsky-Desir, 2020     | 1188        | 12.963         | 11.104 to 15.007 | 0.23       | 2.44   |
| Marcello, 2020           | 4363        | 7.403          | 6.644 to 8.220   | 0.85       | 2.51   |
| Meyer, 2020              | 71          | 16.901         | 9.050 to 27.663  | 0.014      | 1.53   |
| Mikami, 2020             | 2014        | 4.816          | 3.923 to 5.844   | 0.39       | 2.48   |
| Nguyen, 2020             | 266         | 16.541         | 12.284 to 21.563 | 0.052      | 2.15   |
| Paranjpe, 2020           | 1889        | 8.311          | 7.105 to 9.648   | 0.37       | 2.47   |
| Peixoto, 2020            | 19768       | 1.401          | 1.242 to 1.575   | 3.85       | 2.53   |
| Robinson, 2020           | 358         | 20.391         | 16.338 to 24.942 | 0.070      | 2.24   |
| Rosenthal, 2020          | 666         | 14.264         | 11.696 to 17.153 | 0.13       | 2.37   |
| Saha, 2020               | 73          | 16.438         | 8.793 to 26.954  | 0.014      | 1.55   |
| Salacup, 2020            | 190         | 10.000         | 6.129 to 15.175  | 0.037      | 2.03   |
| Sapey, 2020              | 1448        | 20.373         | 18.326 to 22.541 | 0.28       | 2.45   |
| Sardinha, 2020           | 737         | 1.764          | 0.942 to 2.997   | 0.14       | 2.38   |
| Satici, 2020             | 626         | 6.709          | 4.878 to 8.961   | 0.12       | 2.36   |
| Shahriaridad, 2020       | 104         | 5.769          | 2.146 to 12.135  | 0.020      | 1.75   |
| Tartof, 2020             | 6710        | 18.301         | 17.382 to 19.247 | 1.31       | 2.52   |

|                        |        |        |                  |        |        |
|------------------------|--------|--------|------------------|--------|--------|
| Thompson, 2020         | 301    | 11.960 | 8.519 to 16.172  | 0.059  | 2.19   |
| Trabulus, 2020         | 293    | 6.485  | 3.949 to 9.942   | 0.057  | 2.18   |
| Van Gerwen, 2020       | 1399   | 12.223 | 10.552 to 14.055 | 0.27   | 2.45   |
| Total (fixed effects)  | 513612 | 4.854  | 4.795 to 4.913   | 100.00 | 100.00 |
| Total (random effects) | 513612 | 8.445  | 7.224 to 9.751   | 100.00 | 100.00 |

8.45 (7.22 – 9.75)

## Died Pooled Prevalence

| Study                    | Sample size | Proportion (%) | 95% CI           | Weight (%) |        |
|--------------------------|-------------|----------------|------------------|------------|--------|
|                          |             |                |                  | Fixed      | Random |
| Alizadehsani, 2020       | 15          | 0.000          | 0.000 to 21.802  | 0.017      | 0.67   |
| Alkundi, 2020            | 24          | 0.000          | 0.000 to 14.247  | 0.027      | 0.95   |
| Almazeedi, 2020          | 19          | 21.053         | 6.052 to 45.565  | 0.022      | 0.80   |
| Azar, 2020               | 51          | 19.608         | 9.824 to 33.116  | 0.056      | 1.52   |
| Baqui, 2020              | 3328        | 3.005          | 2.451 to 3.643   | 3.58       | 3.41   |
| Berenguer, 2020          | 1116        | 6.183          | 4.842 to 7.760   | 1.20       | 3.28   |
| Bisso, 2020              | 46          | 2.174          | 0.0550 to 11.527 | 0.051      | 1.43   |
| Borobia, 2020            | 460         | 3.696          | 2.167 to 5.851   | 0.50       | 3.04   |
| Caliskan, 2020           | 75          | 5.333          | 1.472 to 13.096  | 0.082      | 1.85   |
| Calmes, 2020             | 87          | 4.598          | 1.267 to 11.355  | 0.095      | 1.98   |
| Choi, 2020               | 277         | 7.581          | 4.754 to 11.355  | 0.30       | 2.80   |
| Choi, 2020               | 126         | 6.349          | 2.781 to 12.127  | 0.14       | 2.28   |
| Clouston, 2020           | 211         | 6.161          | 3.321 to 10.305  | 0.23       | 2.64   |
| Dashti, 2020             | 187         | 13.369         | 8.842 to 19.100  | 0.20       | 2.57   |
| Dominguez-Ramirez, 2020  | 51408       | 2.700          | 2.562 to 2.844   | 55.33      | 3.48   |
| Garibaldi, 2020          | 131         | 6.107          | 2.673 to 11.678  | 0.14       | 2.31   |
| Gayam, 2020              | 132         | 12.121         | 7.090 to 18.937  | 0.14       | 2.31   |
| Giannoglou, 2020         | 81          | 12.346         | 6.082 to 21.534  | 0.088      | 1.92   |
| Gupta, 2020              | 784         | 8.929          | 7.026 to 11.146  | 0.84       | 3.21   |
| Haw, 2020                | 768         | 2.865          | 1.804 to 4.305   | 0.83       | 3.20   |
| Hernandez-Galdamez, 2020 | 25928       | 2.098          | 1.927 to 2.280   | 27.91      | 3.47   |
| Hsu, 2020                | 98          | 15.306         | 8.827 to 23.986  | 0.11       | 2.08   |
| Hussein, 2020            | 64          | 10.938         | 4.512 to 21.246  | 0.070      | 1.71   |
| Lee, 2020                | 227         | 19.383         | 14.451 to 25.134 | 0.25       | 2.69   |
| Lombardi, 2020           | 233         | 0.858          | 0.104 to 3.066   | 0.25       | 2.71   |
| Lovinsky-Desir, 2020     | 110         | 8.182          | 3.810 to 14.964  | 0.12       | 2.17   |
| Marcello, 2020           | 1717        | 5.999          | 4.923 to 7.228   | 1.85       | 3.35   |
| Meyer, 2020              | 30          | 10.000         | 2.112 to 26.529  | 0.033      | 1.10   |
| Mikami, 2020             | 1694        | 4.486          | 3.551 to 5.583   | 1.82       | 3.35   |
| Nguyen, 2020             | 34          | 5.882          | 0.720 to 19.677  | 0.038      | 1.19   |
| Paranjpe, 2020           | 310         | 7.419          | 4.761 to 10.925  | 0.33       | 2.86   |
| Peixoto, 2020            | 502         | 0.598          | 0.123 to 1.736   | 0.54       | 3.07   |
| Robinson, 2020           | 45          | 15.556         | 6.491 to 29.455  | 0.050      | 1.42   |
| Rosenthal, 2020          | 61          | 16.393         | 8.152 to 28.089  | 0.067      | 1.67   |
| Saha, 2020               | 95          | 3.158          | 0.656 to 8.952   | 0.10       | 2.05   |
| Salacup, 2020            | 52          | 0.000          | 0.000 to 6.848   | 0.057      | 1.54   |
| Sapey, 2020              | 769         | 18.596         | 15.905 to 21.529 | 0.83       | 3.20   |
| Sardinha, 2020           | 470         | 2.128          | 1.025 to 3.878   | 0.51       | 3.05   |
| Satici, 2020             | 55          | 1.818          | 0.0460 to 9.719  | 0.060      | 1.58   |
| Shahriaridad, 2020       | 9           | 11.111         | 0.281 to 48.250  | 0.011      | 0.45   |
| Tartof, 2020             | 206         | 21.359         | 15.969 to 27.593 | 0.22       | 2.63   |

|                        |       |       |                  |        |        |
|------------------------|-------|-------|------------------|--------|--------|
| Thompson, 2020         | 169   | 6.509 | 3.294 to 11.348  | 0.18   | 2.50   |
| Trabulus, 2020         | 43    | 2.326 | 0.0589 to 12.289 | 0.047  | 1.38   |
| Van Gerwen, 2020       | 616   | 9.903 | 7.660 to 12.538  | 0.66   | 3.14   |
| Total (fixed effects)  | 92863 | 2.945 | 2.837 to 3.056   | 100.00 | 100.00 |
| Total (random effects) | 92863 | 6.814 | 5.732 to 7.982   | 100.00 | 100.00 |

6.81 (5.73 – 7.98)

## Severity

| Study                | Intervention | Controls   | Relative risk | 95% CI                 | z | P | Weight (%) |        |
|----------------------|--------------|------------|---------------|------------------------|---|---|------------|--------|
|                      |              |            |               |                        |   |   | Fixed      | Random |
| Aggarwal, 2020       | 2/24         | 0/8        | 1.800         | 0.0952<br>to<br>34.024 |   |   | 0.055      | 0.35   |
| Almazeedi, 2020      | 37/1054      | 6/42       | 0.246         | 0.110<br>to<br>0.550   |   |   | 0.73       | 2.56   |
| Andrikopoulou, 2020  | 8/34         | 10/124     | 2.918         | 1.249<br>to<br>6.818   |   |   | 0.66       | 2.42   |
| Argenziano, 2020     | 29/236       | 59/614     | 1.279         | 0.842<br>to<br>1.943   |   |   | 2.70       | 4.08   |
| Azar, 2020           | 23/146       | 20/110     | 0.866         | 0.502<br>to<br>1.495   |   |   | 1.59       | 3.53   |
| Bermejo-Martin, 2020 | 6/100        | 2/100      | 3.000         | 0.620<br>to<br>14.509  |   |   | 0.19       | 1.05   |
| Broadhurst, 2020     | 15/139       | 29/212     | 0.789         | 0.439<br>to<br>1.417   |   |   | 1.38       | 3.37   |
| Bruckner, 2020       | 3/51         | 7/54       | 0.454         | 0.124<br>to<br>1.660   |   |   | 0.28       | 1.41   |
| Caliskan, 2020       | 17/474       | 4/91       | 0.816         | 0.281<br>to<br>2.369   |   |   | 0.42       | 1.85   |
| Calmes, 2020         | 47/508       | 10/88      | 0.814         | 0.428<br>to<br>1.550   |   |   | 1.14       | 3.14   |
| Dashti, 2020         | 90/619       | 81/575     | 1.032         | 0.782<br>to<br>1.363   |   |   | 6.13       | 4.65   |
| Garibaldi, 2020      | 54/523       | 16/171     | 1.103         | 0.649<br>to<br>1.876   |   |   | 1.68       | 3.60   |
| Giannouchos, 2020    | 269/11705    | 2341/78049 | 0.766         | 0.676<br>to<br>0.868   |   |   | 30.44      | 5.10   |
| Goyal, 2020          | 17/130       | 32/263     | 1.075         | 0.620<br>to<br>1.862   |   |   | 1.57       | 3.52   |
| Gregoriano, 2020     | 5/35         | 11/64      | 0.831         | 0.314<br>to<br>2.200   |   |   | 0.50       | 2.07   |

|                          |          |            |       |                        |  |  |       |      |
|--------------------------|----------|------------|-------|------------------------|--|--|-------|------|
| Hernandez-Galdamez, 2020 | 143/5508 | 1379/59987 | 1.129 | 0.953<br>to<br>1.339   |  |  | 16.38 | 5.00 |
| Higuchi, 2020            | 8/50     | 0/7        | 2.667 | 0.170<br>to<br>41.844  |  |  | 0.062 | 0.40 |
| Hsu, 2020                | 29/188   | 140/900    | 0.992 | 0.687<br>to<br>1.432   |  |  | 3.50  | 4.29 |
| Lee, 2020                | 621/6901 | 63/371     | 0.530 | 0.418<br>to<br>0.672   |  |  | 8.41  | 4.79 |
| Li, 2020                 | 3/269    | 2/279      | 1.556 | 0.262<br>to<br>9.238   |  |  | 0.15  | 0.86 |
| Lovinsky-Desir, 2020     | 35/268   | 128/1030   | 1.051 | 0.741<br>to<br>1.490   |  |  | 3.89  | 4.37 |
| Maeda, 2020              | 19/167   | 4/57       | 1.621 | 0.576<br>to<br>4.566   |  |  | 0.44  | 1.92 |
| Mendy, 2020              | 23/91    | 47/598     | 3.216 | 2.056<br>to<br>5.030   |  |  | 2.36  | 3.96 |
| Meyer, 2020              | 3/20     | 12/81      | 1.012 | 0.315<br>to<br>3.251   |  |  | 0.35  | 1.64 |
| Monteiro, 2020           | 9/84     | 4/28       | 0.750 | 0.250<br>to<br>2.247   |  |  | 0.39  | 1.78 |
| Morshed, 2020            | 5/87     | 1/16       | 0.920 | 0.115<br>to<br>7.359   |  |  | 0.11  | 0.66 |
| Myrstad, 2020            | 0/15     | 7/51       | 0.217 | 0.0131<br>to<br>3.589  |  |  | 0.060 | 0.38 |
| Newton, 2020             | 54/370   | 13/70      | 0.786 | 0.454<br>to<br>1.361   |  |  | 1.57  | 3.52 |
| Ortiz-Birzuela, 2020     | 0/29     | 2/111      | 0.747 | 0.0368<br>to<br>15.141 |  |  | 0.052 | 0.34 |
| Ottenhoff, 2020          | 187/1703 | 43/516     | 1.318 | 0.960<br>to<br>1.808   |  |  | 4.72  | 4.50 |
| Regina, 2020             | 1/37     | 11/263     | 0.646 | 0.0859<br>to<br>4.862  |  |  | 0.12  | 0.69 |

|                        |            |             |       |                        |            |       |        |        |
|------------------------|------------|-------------|-------|------------------------|------------|-------|--------|--------|
| Rosenthal, 2020        | 94/659     | 11/68       | 0.882 | 0.497<br>to<br>1.563   |            |       | 1.44   | 3.42   |
| Shabwarishi, 2000      | 1/16       | 3/134       | 2.792 | 0.308<br>to<br>25.271  |            |       | 0.098  | 0.59   |
| Shahriaridad, 2020     | 6/102      | 1/11        | 0.647 | 0.0855<br>to<br>4.895  |            |       | 0.12   | 0.69   |
| Song, 2020             | 1/242      | 21/719      | 0.141 | 0.0191<br>to<br>1.046  |            |       | 0.12   | 0.70   |
| Suleyman, 2020         | 19/141     | 34/214      | 0.848 | 0.504<br>to<br>1.426   |            |       | 1.75   | 3.65   |
| Toussie, 2020          | 17/136     | 29/202      | 0.871 | 0.498<br>to<br>1.521   |            |       | 1.52   | 3.48   |
| Uchida, 2020           | 0/27       | 1/8         | 0.107 | 0.00477<br>to<br>2.405 |            |       | 0.049  | 0.32   |
| Wang, 2020             | 5/50       | 1/73        | 7.300 | 0.879<br>to<br>60.618  |            |       | 0.11   | 0.64   |
| Wang, 2020             | 46/509     | 22/53       | 0.218 | 0.143<br>to<br>0.332   |            |       | 2.66   | 4.06   |
| Yang, 2020             | 6/397      | 1/66        | 0.997 | 0.122<br>to<br>8.153   |            |       | 0.11   | 0.65   |
| Total (fixed effects)  | 1957/33844 | 4608/146478 | 0.895 | 0.836<br>to<br>0.959   | -<br>3.147 | 0.002 | 100.00 | 100.00 |
| Total (random effects) | 1957/33844 | 4608/146478 | 0.920 | 0.768<br>to<br>1.102   | -<br>0.909 | 0.363 | 100.00 | 100.00 |

0.92 (0.77 – 1.10), p = 0.36

## Severe Pooled Prevalence

|                          |       |        |                  |        |        |
|--------------------------|-------|--------|------------------|--------|--------|
| Aggarwal, 2020           | 24    | 8.333  | 1.026 to 26.997  | 0.074  | 1.51   |
| Almazeedi, 2020          | 1054  | 3.510  | 2.483 to 4.806   | 3.11   | 2.99   |
| Andrikopoulou, 2020      | 34    | 23.529 | 10.746 to 41.171 | 0.10   | 1.77   |
| Argenziano, 2020         | 236   | 12.288 | 8.386 to 17.169  | 0.70   | 2.77   |
| Azar, 2020               | 146   | 15.753 | 10.256 to 22.694 | 0.43   | 2.61   |
| Bermejo-Martin, 2020     | 100   | 6.000  | 2.233 to 12.603  | 0.30   | 2.44   |
| Broadhurst, 2020         | 139   | 10.791 | 6.167 to 17.174  | 0.41   | 2.59   |
| Bruckner, 2020           | 51    | 5.882  | 1.230 to 16.242  | 0.15   | 2.05   |
| Caliskan, 2020           | 474   | 3.586  | 2.103 to 5.680   | 1.40   | 2.91   |
| Calmes, 2020             | 508   | 9.252  | 6.877 to 12.113  | 1.50   | 2.92   |
| Dashti, 2020             | 619   | 14.540 | 11.856 to 17.566 | 1.83   | 2.95   |
| Garibaldi, 2020          | 523   | 10.325 | 7.852 to 13.257  | 1.55   | 2.92   |
| Giannouchos, 2020        | 11705 | 2.298  | 2.034 to 2.586   | 34.55  | 3.06   |
| Goyal, 2020              | 130   | 13.077 | 7.806 to 20.110  | 0.39   | 2.56   |
| Gregoriano, 2020         | 35    | 14.286 | 4.806 to 30.257  | 0.11   | 1.79   |
| Hernandez-Galdamez, 2020 | 5508  | 2.596  | 2.192 to 3.051   | 16.26  | 3.05   |
| Higuchi, 2020            | 50    | 16.000 | 7.170 to 29.113  | 0.15   | 2.04   |
| Hsu, 2020                | 188   | 15.426 | 10.581 to 21.397 | 0.56   | 2.70   |
| Lee, 2020                | 6901  | 8.999  | 8.334 to 9.699   | 20.37  | 3.06   |
| Li, 2020                 | 269   | 1.115  | 0.231 to 3.224   | 0.80   | 2.80   |
| Lovinsky-Desir, 2020     | 268   | 13.060 | 9.268 to 17.692  | 0.79   | 2.80   |
| Maeda, 2020              | 167   | 11.377 | 6.991 to 17.196  | 0.50   | 2.66   |
| Mendy, 2020              | 91    | 25.275 | 16.746 to 35.473 | 0.27   | 2.40   |
| Meyer, 2020              | 20    | 15.000 | 3.207 to 37.893  | 0.062  | 1.38   |
| Monteiro, 2020           | 84    | 10.714 | 5.018 to 19.367  | 0.25   | 2.35   |
| Morshed, 2020            | 87    | 5.747  | 1.892 to 12.904  | 0.26   | 2.37   |
| Myrstad, 2020            | 15    | 0.000  | 0.000 to 21.802  | 0.047  | 1.17   |
| Newton, 2020             | 370   | 14.595 | 11.158 to 18.610 | 1.09   | 2.87   |
| Ortiz-Birzuela, 2020     | 29    | 0.000  | 0.000 to 11.944  | 0.089  | 1.65   |
| Ottenhoff, 2020          | 1703  | 10.981 | 9.535 to 12.563  | 5.03   | 3.02   |
| Regina, 2020             | 37    | 2.703  | 0.0684 to 14.160 | 0.11   | 1.83   |
| Rosenthal, 2020          | 659   | 14.264 | 11.683 to 17.170 | 1.95   | 2.95   |
| Shabwarishi, 2000        | 16    | 6.250  | 0.158 to 30.232  | 0.050  | 1.22   |
| Shahriaridad, 2020       | 102   | 5.882  | 2.189 to 12.365  | 0.30   | 2.45   |
| Song, 2020               | 242   | 0.413  | 0.0105 to 2.281  | 0.72   | 2.77   |
| Suleyman, 2020           | 141   | 13.475 | 8.312 to 20.241  | 0.42   | 2.60   |
| Toussie, 2020            | 136   | 12.500 | 7.453 to 19.258  | 0.40   | 2.58   |
| Uchida, 2020             | 27    | 0.000  | 0.000 to 12.770  | 0.083  | 1.60   |
| Wang, 2020               | 50    | 10.000 | 3.328 to 21.814  | 0.15   | 2.04   |
| Wang, 2020               | 509   | 9.037  | 6.692 to 11.870  | 1.51   | 2.92   |
| Yang, 2020               | 397   | 1.511  | 0.557 to 3.260   | 1.17   | 2.88   |
| Total (fixed effects)    | 33844 | 5.120  | 4.888 to 5.360   | 100.00 | 100.00 |



|                        |       |       |                 |        |        |
|------------------------|-------|-------|-----------------|--------|--------|
| Total (random effects) | 33844 | 8.673 | 6.867 to 10.668 | 100.00 | 100.00 |
|------------------------|-------|-------|-----------------|--------|--------|

8.67 (6.87 – 10.67)

## Not Severe Pooled Prevalence

|                          |        |        |                  |        |        |
|--------------------------|--------|--------|------------------|--------|--------|
| Aggarwal, 2020           | 8      | 0.000  | 0.000 to 36.942  | 0.0061 | 0.45   |
| Almazeedi, 2020          | 42     | 14.286 | 5.428 to 28.539  | 0.029  | 1.52   |
| Andrikopoulou, 2020      | 124    | 8.065  | 3.935 to 14.331  | 0.085  | 2.57   |
| Argenziano, 2020         | 614    | 9.609  | 7.395 to 12.220  | 0.42   | 3.62   |
| Azar, 2020               | 110    | 18.182 | 11.474 to 26.674 | 0.076  | 2.46   |
| Bermejo-Martin, 2020     | 100    | 2.000  | 0.243 to 7.038   | 0.069  | 2.37   |
| Broadhurst, 2020         | 212    | 13.679 | 9.356 to 19.051  | 0.15   | 3.03   |
| Bruckner, 2020           | 54     | 12.963 | 5.374 to 24.901  | 0.038  | 1.76   |
| Caliskan, 2020           | 91     | 4.396  | 1.210 to 10.873  | 0.063  | 2.28   |
| Calmes, 2020             | 88     | 11.364 | 5.586 to 19.907  | 0.061  | 2.24   |
| Dashti, 2020             | 575    | 14.087 | 11.347 to 17.202 | 0.39   | 3.59   |
| Garibaldi, 2020          | 171    | 9.357  | 5.443 to 14.750  | 0.12   | 2.85   |
| Giannouchos, 2020        | 78049  | 2.999  | 2.881 to 3.121   | 53.27  | 4.03   |
| Goyal, 2020              | 263    | 12.167 | 8.473 to 16.741  | 0.18   | 3.18   |
| Gregoriano, 2020         | 64     | 17.187 | 8.905 to 28.675  | 0.044  | 1.93   |
| Hernandez-Galdamez, 2020 | 59987  | 2.299  | 2.180 to 2.422   | 40.94  | 4.03   |
| Higuchi, 2020            | 7      | 0.000  | 0.000 to 40.962  | 0.0055 | 0.41   |
| Hsu, 2020                | 900    | 15.556 | 13.248 to 18.091 | 0.61   | 3.74   |
| Lee, 2020                | 371    | 16.981 | 13.302 to 21.196 | 0.25   | 3.39   |
| Li, 2020                 | 279    | 0.717  | 0.0869 to 2.565  | 0.19   | 3.22   |
| Lovinsky-Desir, 2020     | 1030   | 12.427 | 10.474 to 14.598 | 0.70   | 3.78   |
| Maeda, 2020              | 57     | 7.018  | 1.945 to 17.004  | 0.040  | 1.81   |
| Mendy, 2020              | 598    | 7.860  | 5.832 to 10.315  | 0.41   | 3.61   |
| Meyer, 2020              | 81     | 14.815 | 7.896 to 24.449  | 0.056  | 2.16   |
| Monteiro, 2020           | 28     | 14.286 | 4.034 to 32.665  | 0.020  | 1.17   |
| Morshed, 2020            | 16     | 6.250  | 0.158 to 30.232  | 0.012  | 0.78   |
| Myrstad, 2020            | 51     | 13.725 | 5.701 to 26.255  | 0.035  | 1.70   |
| Newton, 2020             | 70     | 18.571 | 10.276 to 29.661 | 0.048  | 2.02   |
| Ortiz-Birzuela, 2020     | 111    | 1.802  | 0.219 to 6.357   | 0.076  | 2.47   |
| Ottenhoff, 2020          | 516    | 8.333  | 6.096 to 11.061  | 0.35   | 3.55   |
| Regina, 2020             | 263    | 4.183  | 2.106 to 7.360   | 0.18   | 3.18   |
| Rosenthal, 2020          | 68     | 16.176 | 8.362 to 27.103  | 0.047  | 1.99   |
| Shabwarishi, 2000        | 134    | 2.239  | 0.464 to 6.403   | 0.092  | 2.64   |
| Shahriaridad, 2020       | 11     | 9.091  | 0.230 to 41.278  | 0.0082 | 0.58   |
| Song, 2020               | 719    | 2.921  | 1.817 to 4.430   | 0.49   | 3.67   |
| Suleyman, 2020           | 214    | 15.888 | 11.261 to 21.488 | 0.15   | 3.03   |
| Toussie, 2020            | 202    | 14.356 | 9.830 to 19.963  | 0.14   | 2.99   |
| Uchida, 2020             | 8      | 12.500 | 0.316 to 52.651  | 0.0061 | 0.45   |
| Wang, 2020               | 73     | 1.370  | 0.0347 to 7.398  | 0.051  | 2.06   |
| Wang, 2020               | 53     | 41.509 | 28.136 to 55.866 | 0.037  | 1.74   |
| Yang, 2020               | 66     | 1.515  | 0.0384 to 8.155  | 0.046  | 1.96   |
| Total (fixed effects)    | 146478 | 2.983  | 2.897 to 3.072   | 100.00 | 100.00 |

|                        |        |       |                 |        |        |
|------------------------|--------|-------|-----------------|--------|--------|
| Total (random effects) | 146478 | 9.142 | 7.842 to 10.530 | 100.00 | 100.00 |
|------------------------|--------|-------|-----------------|--------|--------|

9.14 (7.84 – 10.53)

## COVID testing

| Study                   | Intervention | Controls     | Relative risk | 95% CI         | z | P | Weight (%) |        |
|-------------------------|--------------|--------------|---------------|----------------|---|---|------------|--------|
|                         |              |              |               |                |   |   | Fixed      | Random |
| Azar, 2020              | 119/1052     | 2042/12983   | 0.719         | 0.604 to 0.856 |   |   | 1.40       | 6.96   |
| Barasa, 2020            | 14/117       | 36/277       | 0.921         | 0.516 to 1.642 |   |   | 0.13       | 1.85   |
| Caliskan, 2020          | 21/565       | 8/248        | 1.152         | 0.517 to 2.566 |   |   | 0.066      | 1.06   |
| Chudasama, 2020         | 226/1706     | 41379/358576 | 1.148         | 1.016 to 1.297 |   |   | 2.86       | 8.10   |
| Dai, 2020               | 41/863       | 21788/305588 | 0.666         | 0.494 to 0.899 |   |   | 0.47       | 4.52   |
| Giannouchos, 2020       | 2603/89756   | 6161/146682  | 0.690         | 0.660 to 0.722 |   |   | 20.90      | 9.37   |
| Goodacre, 2020          | 767/5768     | 1276/8228    | 0.858         | 0.789 to 0.932 |   |   | 6.16       | 8.84   |
| Green, 2020             | 153/2266     | 3387/35203   | 0.702         | 0.600 to 0.821 |   |   | 1.74       | 7.35   |
| Israel, 2020            | 195/4151     | 1287/20755   | 0.758         | 0.654 to 0.877 |   |   | 1.97       | 7.56   |
| Lieberman-Cribbin, 2020 | 275/6245     | 346/5160     | 0.657         | 0.563 to 0.766 |   |   | 1.79       | 7.40   |
| Marcello, 2020          | 710/10142    | 711/6464     | 0.636         | 0.576 to 0.703 |   |   | 4.31       | 8.55   |
| Meyers, 2020            | 5/91         | 258/2862     | 0.610         | 0.258 to 1.440 |   |   | 0.057      | 0.93   |
| Porto, 2020             | 26/410       | 68/763       | 0.712         | 0.460 to 1.100 |   |   | 0.22       | 2.84   |
| Shah, 2020              | 4/33         | 38/283       | 0.903         | 0.344 to 2.370 |   |   | 0.046      | 0.76   |

|                        |                 |                    |       |                      |                 |            |            |        |
|------------------------|-----------------|--------------------|-------|----------------------|-----------------|------------|------------|--------|
| Singer, 2020           | 99/1651         | 137/1246           | 0.545 | 0.426<br>to<br>0.699 |                 |            | 0.69       | 5.42   |
| Sundaram, 2020         | 3880/25030      | 136461/733661      | 0.833 | 0.809<br>to<br>0.858 |                 |            | 49.37      | 9.50   |
| Yang, 2020             | 727/7340        | 4850/32119         | 0.656 | 0.609<br>to<br>0.706 |                 |            | 7.81       | 8.99   |
| Total (fixed effects)  | 9865/15718<br>6 | 220233/167109<br>8 | 0.769 | 0.753<br>to<br>0.785 | -<br>24.97<br>9 | <0.00<br>1 | 100.0<br>0 | 100.00 |
| Total (random effects) | 9865/15718<br>6 | 220233/167109<br>8 | 0.742 | 0.680<br>to<br>0.810 | -6.688          | <0.00<br>1 | 100.0<br>0 | 100.00 |

Significant 0.74 (0.68 – 0.81),  $p < 0.001$

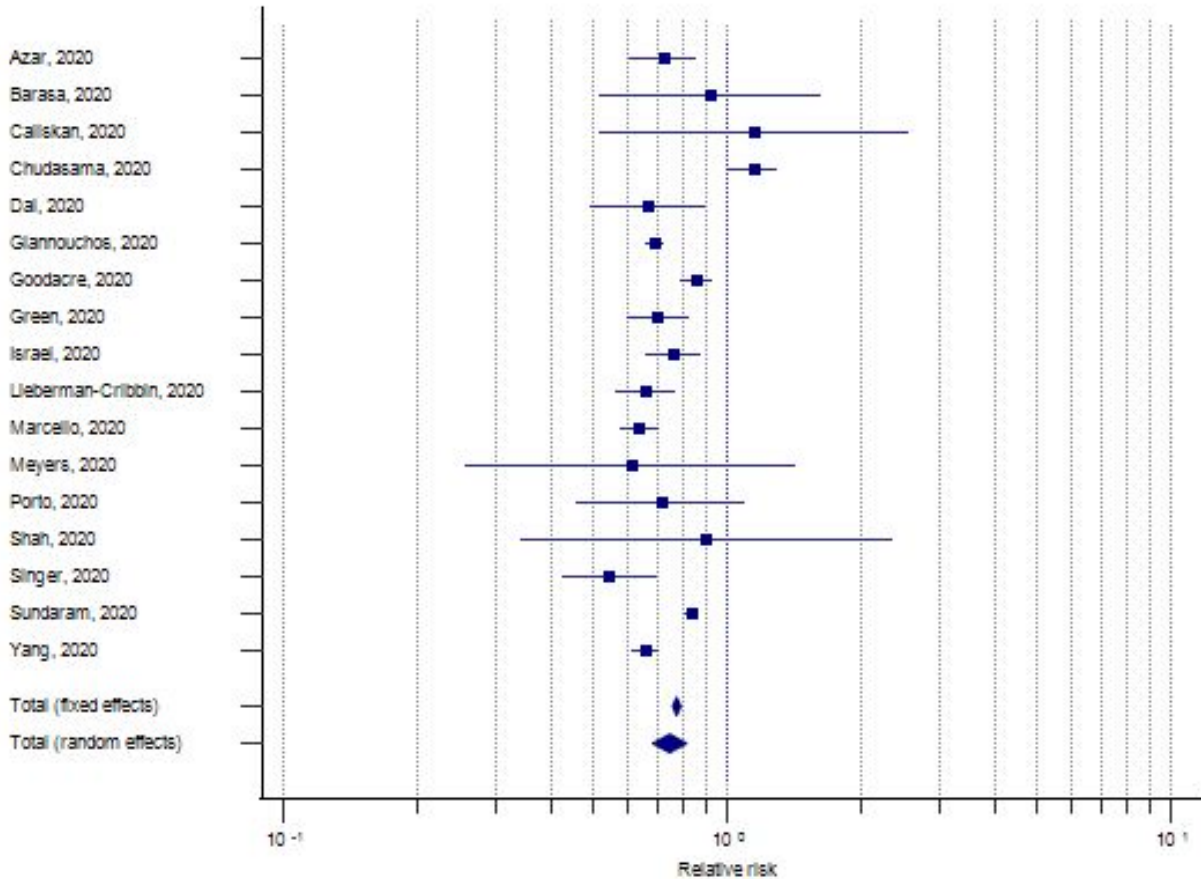

COVID+ pooled prevalence

| Study                   | Sample size | Proportion (%) | 95% CI           | Weight (%) |        |
|-------------------------|-------------|----------------|------------------|------------|--------|
|                         |             |                |                  | Fixed      | Random |
| Azar, 2020              | 1052        | 11.312         | 9.461 to 13.382  | 0.67       | 6.08   |
| Barasa, 2020            | 117         | 11.966         | 6.699 to 19.261  | 0.075      | 5.32   |
| Caliskan, 2020          | 565         | 3.717          | 2.315 to 5.626   | 0.36       | 5.98   |
| Chudasama, 2020         | 1706        | 13.247         | 11.674 to 14.949 | 1.09       | 6.12   |
| Dai, 2020               | 863         | 4.751          | 3.431 to 6.390   | 0.55       | 6.05   |
| Giannouchos, 2020       | 89756       | 2.900          | 2.791 to 3.012   | 57.10      | 6.19   |
| Goodacre, 2020          | 5768        | 13.298         | 12.431 to 14.201 | 3.67       | 6.17   |
| Green, 2020             | 2266        | 6.752          | 5.753 to 7.864   | 1.44       | 6.13   |
| Israel, 2020            | 4151        | 4.698          | 4.074 to 5.386   | 2.64       | 6.16   |
| Lieberman-Cribbin, 2020 | 6245        | 4.404          | 3.908 to 4.942   | 3.97       | 6.17   |
| Marcello, 2020          | 10142       | 7.000          | 6.511 to 7.514   | 6.45       | 6.17   |
| Meyers, 2020            | 91          | 5.495          | 1.808 to 12.358  | 0.059      | 5.12   |
| Porto, 2020             | 410         | 6.341          | 4.184 to 9.154   | 0.26       | 5.91   |
| Shah, 2020              | 33          | 12.121         | 3.403 to 28.202  | 0.022      | 3.96   |
| Singer, 2020            | 1651        | 5.996          | 4.900 to 7.252   | 1.05       | 6.12   |
| Sundaram, 2020          | 25030       | 15.501         | 15.055 to 15.956 | 15.92      | 6.18   |
| Yang, 2020              | 7340        | 9.905          | 9.230 to 10.611  | 4.67       | 6.17   |
| Total (fixed effects)   | 157186      | 5.564          | 5.451 to 5.678   | 100.00     | 100.00 |
| Total (random effects)  | 157186      | 7.806          | 5.084 to 11.051  | 100.00     | 100.00 |

7.81 (5.08 – 11.05)

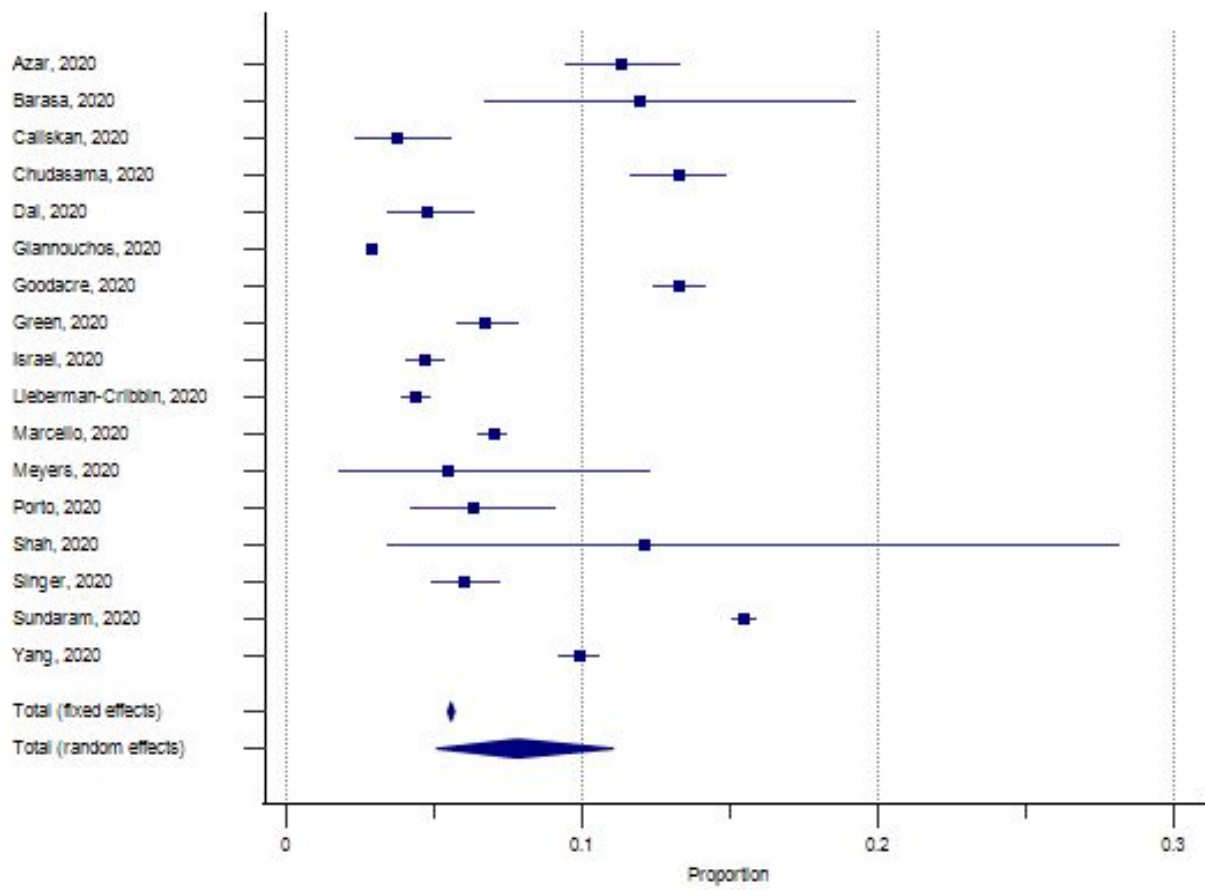

### COVID- pooled prevalence

| Study                   | Sample size | Proportion (%) | 95% CI           | Weight (%) |        |
|-------------------------|-------------|----------------|------------------|------------|--------|
|                         |             |                |                  | Fixed      | Random |
| Azar, 2020              | 12983       | 15.727         | 15.105 to 16.365 | 0.78       | 5.99   |
| Barasa, 2020            | 277         | 12.996         | 9.271 to 17.536  | 0.017      | 5.50   |
| Caliskan, 2020          | 248         | 3.226          | 1.403 to 6.257   | 0.015      | 5.45   |
| Chudasama, 2020         | 358576      | 11.540         | 11.436 to 11.645 | 21.46      | 6.00   |
| Dai, 2020               | 305588      | 7.130          | 7.039 to 7.222   | 18.29      | 6.00   |
| Giannouchos, 2020       | 146682      | 4.200          | 4.098 to 4.304   | 8.78       | 6.00   |
| Goodacre, 2020          | 8228        | 15.506         | 14.730 to 16.306 | 0.49       | 5.98   |
| Green, 2020             | 35203       | 9.621          | 9.315 to 9.934   | 2.11       | 6.00   |
| Israel, 2020            | 20755       | 6.201          | 5.877 to 6.538   | 1.24       | 5.99   |
| Lieberman-Cribbin, 2020 | 5160        | 6.705          | 6.038 to 7.422   | 0.31       | 5.97   |
| Marcello, 2020          | 6464        | 10.999         | 10.247 to 11.788 | 0.39       | 5.98   |
| Meyers, 2020            | 2862        | 9.015          | 7.990 to 10.124  | 0.17       | 5.95   |
| Porto, 2020             | 763         | 8.912          | 6.987 to 11.162  | 0.046      | 5.81   |
| Shah, 2020              | 283         | 13.428         | 9.680 to 17.962  | 0.017      | 5.51   |
| Singer, 2020            | 1246        | 10.995         | 9.312 to 12.865  | 0.075      | 5.88   |
| Sundaram, 2020          | 733661      | 18.600         | 18.511 to 18.689 | 43.90      | 6.00   |
| Yang, 2020              | 32119       | 15.100         | 14.710 to 15.496 | 1.92       | 6.00   |
| Total (fixed effects)   | 1671098     | 12.640         | 12.589 to 12.690 | 100.00     | 100.00 |
| Total (random effects)  | 1671098     | 10.232         | 7.526 to 13.299  | 100.00     | 100.00 |

10.23 (7.53 – 13.30)



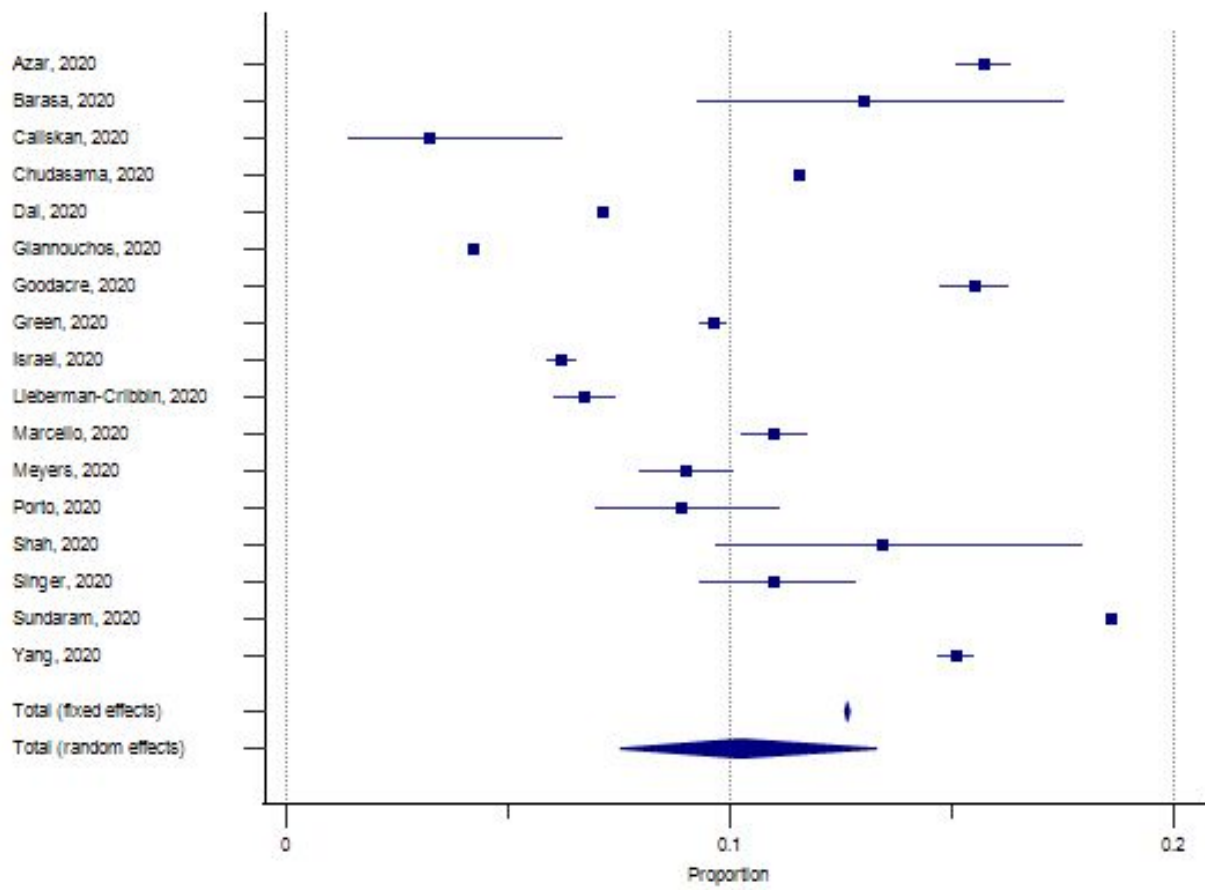

# Meta-analysis of Relative Measures of Association Adjusted for Confounding Factors

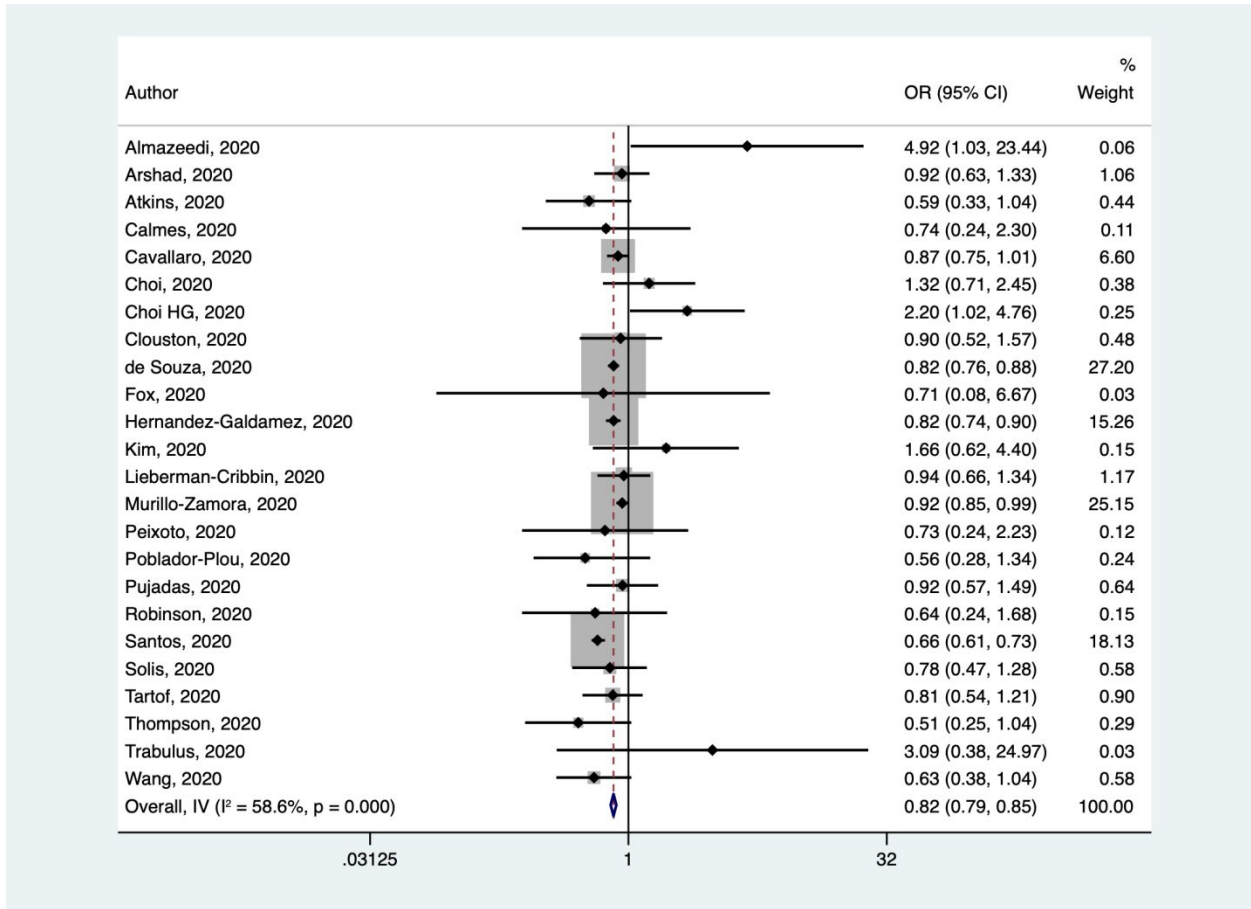

Significant heterogeneity,  $I^2 = 59.1\%$ , (29.7% - 72.9%),  $p < 0.001$
